# Supplementary material
Source: publisher figshare collection journal article supplement (https://gsajournals.figshare.com/ndownloader/files/17726078)
Supplement: Supplementary file 1 [file 17726078]

## Sheet: Table S5
Table S5: The 490 predicted proteins with annotated CAZY domain. For each protein with a CAZY annotation the contig number (column A), gene ID, lenght and contig locus (column B, C, D) and SignalP-5.0 prediction (column E) is indicated. Putative protein with at least one Cazy domain were annotated using dbCAN2 which lean on HMMER (column F), Hotpep (column G) and DIAMOND (column H). Column I indi…
				SignalP-5.0 prediction results	dbCAN2 prediction results
Contig number	Gene ID	Gene length (in bp)	Locus	Prediction	HMMER	Hotpep	DIAMOND	#ofTools	Protein sequence
unitig_0	g1010	1669	unitig_0:2693144-2694813	SP(Sec/SPI)	GH5_1(39-349)	N	N	1	MRTTTALTAALAVHASTALAATSSITFKTVKGQIYADDQPFYIKGVNWFGFETIESVVQGLWPSATTIEAALDLLQSYDVNALRLPLALDSIISNPEVDNDQTAGTPALAGKTYLEVLDYFIYECRKRNILVVLDNHRMEASEPDFPDVAEPKKIIPALEKLAERYCSNPATWNVLGIDIKNEPKGKATWGSGDESTDWNLAAATIGNAVLDKCKRFLIFVEGVQTNIKGETVEWGQAGGSLQGTKKNPVKLKNMERLVYSPHLISPGVDYKSPWWLASDFPSNMVKIWDSYFGFVPEKTGNPVVIGAWGAKMEGKNEKWATEVASYLAKNKLGSFYWAFNPQSADTGGLVKDDWRTAIEERFELLADLPTTDVSKLLNKYGKCKDGCKGYGQCVDGQC…
unitig_0	g141	2255	unitig_0:346963-349218	SP(Sec/SPI)	GH81(83-745)	GH81	GH81	3	MKTINTLLGLTALAASAVTGATLEGAGLVVNSTNSEVNIAPLGDFQLFEALSTEAPPSNIFAYTNRHSTFLPPRYLAPGLVGNAAIPTNNWWGNMIAYSTDAQPNPVWANPYVFRATIAAAPYGLTLSYPYTTRALGGSTGNGNANQFYLHAVINDFTLGAAEFTAKPTYEVYGWDDLSVSVRLYRAGDASSKIESTLTSGMAIVTGKYAKLTPKFSTVHAILTVNGASVSNGKTFTGTRFVVTLNSGQRWVIYSTTQITLRVDGSNLVGTSQVTTNIRTALASSDAHLAVLDRTRSCIIEGGDVEARDTNTYAFNMKTSGDCSSGLFHYLQVHHLDTLDRTYAAEVSGADLFSTTRGKMTGVLTKTSPPTIRFTDTRSVPADFYPPRKPSASVVSANN…
unitig_0	g142	2255	unitig_0:352882-355137	SP(Sec/SPI)	GH81(83-745)	GH81	GH81	3	MKTINALLGLIALAASAVNGALLEGAGLVVNNTNTEVKIAPLGDFQLFEALSTEAPPSNIFAYTNRHSTFLPPRYLAPGLVGNAAIPTNNWWGNMIAYSTDAQPNPVWANPYVFRATIAAAPYGLTLSYPYTTRAFGGSTGNGNANQFYLHAVINDFTLGAAEFTAKPTYEVYGWDDLSVSVRLYRAGDASSKIESTLTSGMAIVTGKYAKLTPKFSTVHAILTVNGASVSNGKTFFDSRFVVTLNSGQRWVIYSAVPITLRVDGSNLVGTAQITAYVRTALVSSDAHLAVLDRTRLCLIEGGDVEARDTNTYAFNMKTSGDCSSGLFHYLQVHHLDTLDRTYAAEVSGADLFSTTRGKMTGVLTKTSPPTIRFTDTRSVPADFYPPRKPSASVVSANN…
unitig_0	g143	2255	unitig_0:357009-359264	SP(Sec/SPI)	GH81(83-745)	GH81	GH81	3	MKTINALLGLIALAASAVNGALLEGAGLVVNNTNTEVKIAPLGDFQLFEALSTEAPPADVFAYTNRHSTFLPPRYLAPGLVGNAAIPTNNWWGNMIAYSTDAQPNPVWANPYVFRATIAAAPYGLTLSYPYTTRAFGGSTGNGNANQYYLHAVINDLTLGAAEFTTAPTYEVYGWDDLSVSVRLYRAGDVTSKIESTMTSGMALVTGKYAKLTPKFSTVHAILTVNGAAVSSGQTFTDSRFVVTLNSGQRWVIYSAIPITLRVDGSNLVGTAQITAYVRAALVGSDAHLAVLDKTRLCLIEGGDVEARDTNTYAFNMKTSGDCSSGLFHYLQVHHLDTLDRTYAAEASGADLFSTTRGKMTGVLTKTSPPTIRFTDTTSVPADFYPPRKPSASVVASNN…
unitig_0	g147	1697	unitig_0:366745-368442	OTHER	GH81(5-559)	N	GH81	2	MTIGKLESILTSGMATMTFKYTALTPRIITSSNLVTVNGQRVNASAQISNNRFLLALGNGQNWVLYTSGNITLRGSNSTTGLLANASFTGYIRAAIYTSDAHLAVLDKTKACFLDGVEVKSINTNSYAFNFKTSGVCTSGLFHYLHIHHLDTLDQSTASVVTGTDLISSTRGKMTGVLTKKTPPMVQFTDKASVPADFYSPRKPNATIVAANHITQTLINDINASWSIPVYGSYYFNGKAAQKYAQLCLLARDSSVAGVNGTALLRKCLDKLEAILLPYVENKWSYPMKFDTVYRGIVSSLGFAYNDPYADFGNTMYNDHHYYWGYWIMTAAIVNYLDPMWSRLAQMNRLTSFLIRDVANPTSNDKGFAKFRYFDWFRGHSFSHGVTPFWDGKDQESTS…
unitig_0	g228	10472	unitig_0:574289-584761	OTHER	GH35(108-391)	GH35	GH35	3	MKDAGEENTALLRACDYQDLDDWPAEPPRRRWRLRRADLACLAVIGIVASFVSVRQPELRPDNPLWGHTTAHYEQADDVKQFRYMTYDDIDAEKRRSGYTVTYTQRGFEIDGKATILLGGSIHYPRSTPGMWEDLLLKAKHDGLNHVELYVFWNFHQPEPDTFHLHGRHNLTHFYDLAAKVGLFLHVRFGPMDVRSNSSPWKVEMERFVKKMVELSRPYLAQNGGPIILAQIENEFTADDVDYINWCGSLVSRLNTSIPWVMCNGKAADNTILACNGNDCVDFALKQSEERPSEPFMWTENEGWYQKWGVDPENEHSEQNSNRDPKEVAYAIARWFAIGGAHHNYYMYHGGNNYGRSASAGVTTMYADGVNLHADGLSNEPKRSHLRKLHETLIACNEV…
unitig_0	g240	11111	unitig_0:616863-627974	OTHER	CBM38(3190-3366)	N	N	1	MFTSIRSYAVDAKQLIVLVQPITSVAGEPFALQPVVALTDDDGNILTTENMGTVRAQIGVNPARFASVQPATNSFPIENGIAKCAGLYINLVSSGYTIMFVSLYHGVRAETAPFDIITGSRYKLAIMADISTAFGGTAFRPQPAVGVVDRGGNLVESLNEGTVRLEILKNPVGGTLLPARNLNVSIGGGMGTFQGLYIDVAGSPYYLRYTTDLVLEGGSIVDTNPFTVAEGLCNNLVLAKTPKEATGGKAFSIQPVAKLIDAGGNLLEADSSSIVRVAIASNPSGGTLSPSSLLKARVEKGIAIFRGLRIDKAGEDYTLTFTLFTKIAGRNDWLETSIEKLSPSFNVTVGMPVELFLKQNLSDGVLDGQPNEVQPILALRDSGGNVVSSLVTGTVAASM…
unitig_0	g259	2937	unitig_0:660754-663691	OTHER	GT2_Chitin_synth_1(287-439)+GT2_Chitin_synth_2(418-658)	GT2	GT2	3	MSEGHDDLEARLRAIREARNRGGAASGTLNTQPPRPASTGALPTQPSLGLEEELEELQSMLSDSTYLPRPTMHETVSTTTTTSVPSAEEDAGVWQDMRPSARSYMEDEPPRVYNRQGSHQRAISVPGAGNAHGEVSYESAFRLIQQAADAERNADPLLAIQLYTDAGDLLVRVGKTENDPLLKQGIKEKAMEIMKRAEELDQWYYSLQESFRQAALPPQLKIQKTQVPRVQESWGRRQPPFANSEEFTHMRYTAVTTKDPYHFTNEGFQLRVDELGRKIRTFITITMYNEEGSELKGTLTGIARNLQYMSEVWGERAWENVAIAVVSDGRTKASASCLDFLTSVGAFDEEIMTVTSVGVDVQMHLFESTIQLVRDDNFEAYYPPIQLIYALKENNGGKL…
unitig_0	g291	5932	unitig_0:744004-749936	OTHER	GT41(215-760)	N	N	1	MPRALHEMASNGATLRRFHRHLRANRQFTICTSILQHWIATSAVLWLAVWPVYADQVLKVTPDNALALREAVQWYAQGQEAMENGDHTHAIDKFQRSIEAYPLAGAFNNLGMLIFQTTQDEAQALDIFRRGAGIAKETNDTQNYASTYNNLGHLIRQRNRHSIAYCLEAIEYFDEALAANPDFIDALYNKASALHAMRQNQEAERLYRRVLELNPNYVGAHLDLGSIHFARGEIDEAVHHLDAVIALATSDFALLGALNNKGHFLKANEHYVEALQVHEHAVALAPENPMALVNLVTSKRTLCLWESIEEIHERLLHSIRLELLLRPKGVSLLPYDSTLLPVPDRFRKQLAEAYSKEAEQSATLELLPPVDLGIVDALTDRPSRPLRIAYLTFDFRDHP…
unitig_0	g295	2443	unitig_0:771426-773869	OTHER	GT105(267-330)	N	N	1	MPMEDEVVTQAAAVGLTALLTAWNTRHNQFVWDDRAAVLGNAGVRRHDTSIWRLFKDDFWGTSIDSVNSHKSYRPLTVLTFRWNHYWHGIDPYGYHLVNVVVHAICSVLVWRTAEVIMRLYAPKKRVRVGSIIAGLLFALHPIHCDAVASVVGRADLLCTMFALIGFHYYVDGTTSQVHSTHQKVYYVLAGLGLGVAASLCKELGFTTFALYCAYDIMRGIKEDGVDRFRWRRRASRVGSVVLFTLVCAMLRVSINGEHRQMVWNKLANNIVVQESKLTRVLSYAHVHAWYLWKLVWPGWLSFDYGFNTIPVIESILDPRNLLTLLAYAVVATGVAHGIHTVKTSPVLLMISFGAITFIPASNLFFPVGTVVAERLLYFPSAGFCFLVGYLMEQVFDIH…
unitig_0	g4	425	unitig_0:6191-6616	OTHER	GH43_26(2-131)	N	N	1	MLHRAKTLQELKYSSTQVIWSEKQSVAVGGPCCLYWAPELHRIDNKWYMYFSAVHKGDQEETKMHRNYVIENTNLDPFAGTWKYKGQLKDPKNDFWAIDATILQLRGTNYVLYSDHADNNHILQRIYISKLRIRGHKNQGA
unitig_0	g445	1407	unitig_0:1155110-1156517	OTHER	GT60(101-403)	N	GT60	2	MSYQPYGRVSARDRDRRRAGWDMRFGILMVFPVICLVVVLYEFLYLQQFTASEAQEAAALQEFAATTAAPTQDRIVRLRTEPSVTPSPAPTSIVRGRRTMILIANYRDSKRCSETLRSIFDNAVFPDLLKISIFDQIYLSEGEKPCIETFCELVGEAKCRRSQLVATQIDALVATGPTAARYETEKAITDEDFCLAIDSHLVFVNKWDERLIAQWEATENPNAIITVYPKSTEHLEKRDTEDKVQLMCNSRIETEDADAMIQYAAPIWVDKKDVPKPRLMSQFAGGFNFGNCKQAVDVRNDPYTPYLFHGEEYSRAARLWTAGYDFYVPNDDIVFHWYEKRKVVWERDWGKRYVIQQSSKRRIRYALGLPVTAEDFDRTDLDKFRLGNKRTFEQWKKFS…
unitig_0	g5	1529	unitig_0:7124-8653	SP(Sec/SPI)	GH43_26(46-341)+CBM13(370-507)	GH43	N	2	MNLFRNFLSANETLIKMLLKHLVTLLLCAVGAAVQAADYAGPLGSNPDPHVTYYGGFYYYTGTARPEEGSIVMLHRAKTLQEIKYSPTQTVWSEQQSVAVGGPCCYYWAPELHRIDNKWYIYFSAVQRAGQEEIKWHRNYVIENTNSDPFVGTWTYKGQLKDSQNDFWAIDATILQLRGTNYILYSGHADNDHSLQRIYISKLENPWTQVPGRTMITEPQYSFETNGNVNEGPEILMKNGKVFMVYSANGCWTNQYNLGMLWMNEGDDPMNAASWRKLNYPVFGANPAVGAYSPGHNSFFKSPDGTQDWIAYHAAATANEGCEINRFFNAKLVNWKSDGFPDFGAPVANGHLLPGPSGEPGLSTGAVLANGVYEVVNVVSGRSLDVPSCRGESGLKLQQ…
unitig_0	g6	1478	unitig_0:9152-10630	SP(Sec/SPI)	GH43_26(29-324)+GH5_35(355-489)	GH43	N	2	MFKKVLAFFAIVAGAVTQAADYAGPLGSNPDPYVIYHNGYYYYTGTARPEEGGIVMLHRAKTLQELKYSSTHVIWSEKQSVEAGGPCCYYWAPELHRIDNKWYMYFSAVQKGDQEEIKWHRNYVIENENEDPYEGKWTYKGQLKDPENDFWAIDATILQLRGTNYILYSGHADNDHSLQRIYISKLENPWTQVPGRTMITEPQYSFETNGNVNEGPEILMKNGKVFMVYSANGCWTNQYNLGMLWMNEGDDPMNAKSWHKLDHSVFGSDPSVQAFAPGHNSFFKSPDGKEDWIAYHAAATNKEDCGINRFFNAKKVDWKSDGFPDFGKPVANGHLRPGPSGEPDLPSNNVLANGVYEVVNVESGRSLDVPSCRGESGLKLQQWDAFHNDCQKWIFHNVG…
unitig_0	g630	7873	unitig_0:1683205-1691078	SP(Sec/SPI)	GH16(73-412)+GT48(1628-2279)	GT48	GH16	3	MMFTCKPWALAMASMAVLHALGVGALVPQGIYGRREMDWVDPDTPLESRTIDVPAGPHSFGKGPNMTYKLIFSDEFEDSNRTFEAGFDRRWTALDNLDTTNMGQHYFLPQAVQIDKGNLIITTTKPKHKYRGTTYVSGSLQSWNKFCYTGGYVEVKAVLPGKWGIPGTWPALWIMGNIGRATYLGSQDGTWPWSFDSCAPWVEKAQEVEQMINACGNLTDPDVPGSYPEMYGLNKNQGRGATEIDIMEAQIQVKDQPAMISTSLQIRPSLSDDLRPPIGGLPGPGQWYQGLKFGNYTHINSDYYGDKGLDSISALTQLNSDAYKAFHIYQLDWSPGPYGYIRWFMDGNFLFEIPGAALNVWSEGVPPRMIPAEPSYLILSTAVSEKFSPPCDSQICDSI…
unitig_0	g656	3694	unitig_0:1767500-1771194	SP(Sec/SPI)	GH72(29-383)	GH72	GH72	3	MARWMTSLAVLASALCGTALLEGVEASNGAIIVRGNKMYNEKTGERFLMKGMTYEYAVSDKYYAKYSKETIATNLKGLKFNTLRVYNINPEESYKEFMTDMEKLGVYVLVAASPDNSEYFGKYRYAPIRKDLGPDGPVTGKGQTDNGETCYPSLLLEYGKKIAKNFAQYDNTLGIILANEIMQTDLTAGACVKQYAADLKNWMRANGKKMRMIPLAYAAADSAYNNPKVSKTVLQPEEYHVVKIQGLLCGDKMSDGFMTKSIDMYLINEYRWCEGVDYDATYKFFLELVKGLPIVVGFGEYGCHEPPTKARTWPMVPYLLQEPSKTKGFTNVFSGGLAYSYGEAKLDKGSAFPMFSGGSLDPLEEPSSKASTDYTNLKSQFDKYSPFKETAKWTDSTKC…
unitig_0	g659	2606	unitig_0:1785377-1787983	SP(Sec/SPI)	GH3(149-354)	GH3	GH3	3	MLLALRGIGGICAFWGAAGALAGAEHVHEGKESVFDPLVGDLRAFGRLKDTLAFDKHEVSSVDIDALIANMTLREKVAQMTQLDIYSMMNGEDRNPATALNRTITEEYAKLGIGSILNAPFPGPIDGRTGWDASEWQSITDQIKRIYRQHSKIPMIYGIDTIHGATYVRGATLFGQPLSAASSFNPDLVFKMGEIEAKDTLAAGIPWIFSPILGIAVQPKWSRVYETFGEDPYLVSQMGTSIIQGIQQSGQAAACMKHFIGYSNPIDGLDRADNVISDFDLLNYFAPSFLAAAQAGVKSAMETYVSINGYPVIASHKILTDLLRTDMAFSGMLVSDYSEIDRMQFEHHLVATVDEAVQISLTQTSLDMNMGPKAEDYFATVERLVQQGLVPESRIDESV…
unitig_0	g706	920	unitig_0:1885251-1886171	SP(Sec/SPI)	GH114(28-217)	GH114	N	2	MRAVAVLPFVLYAGAAHAWWKPTPGTSYQIQLQGDLDLSYNVSMYDIDLFDTPESTIDELRERGIKVICYFSAGTYETWRPDKDNFTTDMYGKELPDWENEFYVDTTNEAVRAVMKARIELAKEKGCDGVDPDNVDAMDNDSGLNLTETTQLDYNKFLAKTAHDLDLAVGLKNDLAQVEDLVDDFDFAINEECIEMGDCGDLKPFIASNKPVFGIEYNGDRKRGCALAKELRFDTLYKDLDLKEERYSCGDADLSSSSSLDASYVSDSSSGSTDISVVPTPSSVDRRRGPVSLVCAIAALVAAIRI
unitig_0	g707	503	unitig_0:1886502-1887005	OTHER	GH114(1-103)	GH114	N	2	MKTRMEMAKEKGCDGVDPDNVDGMLNDSGFKLTNATQLDYNKFLAKTAHDLDLAVGLKNDLVQMEDLADDFDFAVNEECIEMGDCDDLKPFIANNKPVFGIEYKGDREKGCKQARELRFDTLYKDLDLKSKRYSCDDADSDSSFGLNYHRATTFVCSIALLAAAFHN
unitig_0	g734	1484	unitig_0:1946343-1947827	SP(Sec/SPI)	GH30_5(23-487)	GH30	GH30_5	3	MRIATILSALALGAHGTASADYTVTVNAKDTMVTWEGWGTSLCWWANVFGEREDVADVFFTLKDSVSIKDGPANLPALGFNIARYNIGGSGNNVIDNNGKKESMKHSENMPAHRFMETFWLDWFNSDPKSSSWNWNADPRQRKMVQLAKARGVNHLEAFSNSPPWWMTKNHATAGADLFGFLDNLQSWNYETFAVYLATVVKYAKDNWGFEFDYVEPFNEPMTGWWLFPGKQEGCHVIVTTQNTVIKHLRRHLNDRGLQSVQIAASDENSPGVAFTTLGMMALSSDVINAVNKVNTHGYMGLEPYRGPLRGALRDLSKSLGKRLWDSEYGEGDGSGLSLAESVGLDINEMGVSAFVYWQVLDIDGWGLIQSRLQDNFIGGANGKYFALAQYSRHIRPGM…
unitig_0	g770	1996	unitig_0:2047852-2049848	SP(Sec/SPI)	GT59(24-432)	GT59	GT59	3	MMTVGTTLAVALAYALVLERVNHVVSEPYMDEIFHVPQAQKYCQGRFDEWDPKITTFPGVYFVGVAFARLYQWLGLSDTGSFCSISVLRSVNVAFAAGNTWLIIRLRQLLMPTDSNLLLHALMITAFPVQFFFSFVYYTDAGAVFFVLLMYFLALRANLVVRPVSPVGLITSAMAGAAAVLFRQTNIVWVLFVAGTTLVRYVERSQGNVIYGSTKQDAKLGSTFVVRNSFFQVAINFVKAIFSDLLPLLSLLWPFIALVLGFIVFLVVNGGIVVGDKSNHEASIHGAQLLYFVFVASTGFGLSLFQPSQVLRFADSTRRQAKSMGGLVFLATIVGVVIAIIHFLSPVHKFMLADNRHYTFYVWRKFFLKHRLAKFIPSLLYMFQGWRCWTELRRTRTPL…
unitig_0	g821	2372	unitig_0:2170928-2173300	SP(Sec/SPI)	GH3(113-325)	N	GH3	2	MLKSWIKALCCTALALAAVPRGTLAETADERAAKIVDKFTIEDILGQMTQINIDVILDSEGKLNEAKVIELAKLRVGSYLNSPFSGGDKNGKYGYTVDEWRKLITRIQELSTKENGGHPIIYGLDSVHGAIYVQNSTIFGQQINGGASFNTDLVRKMGEITGRDTAAAGVSWIFGPILEISQNPLWARTFETFGEDPYLVSVMGSNIIKGIQANDDVAACMKHFVGYSKTPTGHDRDGVTLSDFDLLNYFMPPFIAATQAGVKSAMENYISINGVPVVASSKILRDLLRRDLGFEGFVVTDWAEINNLHDFHRVAKSLSEAVRMSLTQTSIDMSMVPSNTDFINYGKEMLKDFPEYYERLKESARRIVKTKIELGLYETPVPGAKYVKDVGSSDHNQVA…
unitig_0	g822	2372	unitig_0:2174369-2176741	SP(Sec/SPI)	GH3(117-325)	N	GH3	2	MLKTWVKAICCTALAMAIVPRGALGESADDRAKKIVDSFSVDQVLGQMTQINLDVILDSQGHLNEDKVRELAKLHVGSYLGGQYMNGAKNGTYANTVDEWRKMITRIQEIHTEVDNGNPVIYGIDSVHGAIFVQNATIFGQQINGGASFNPDLVRKMGEITGRDTAAAGIPWIFGPILEISQNPLWARTFETFGEDPYLVSVMGSNIIKGIQANKDVAACMKHFVGYSKTPTGHDRDGVTLSDFDLLNYFMPPFIAATQAGVKSAMENYISINGVPVVASSKILRDLLRRDLGFEGFVVTDYAEINNLYNFHRVAKSLSEAVRMSLTQTSIDMSMVPSNTDFINYGKEMLKDFPEYSERLKESARRIVKTKIELGLYETPVPGAKYVKDVGSSDHNQVA…
unitig_0	g823	2372	unitig_0:2178225-2180597	SP(Sec/SPI)	GH3(114-325)	N	GH3	2	MLKSWIKAICFTALALAIVPSGALTDSAESRAAKIVDGFSVDEVLGQMTQINIAVLLNSQGGLDEDKVRQFAKLHVGSYLGSPQTNGPIGGNYSSSVDEWRKMITRIQDIHKEEGNGHPIIYGIDSVHGANFILNTTIFGHQINGGASFNPDLVRKMGEITGRDTAAAGISWTFGPILELSQNPLWPRTYETFGEDPYLVSVMGSNVIKGIQANKDVAACMKHFVGYSKTPTGHDRDGVTLSDFDLLNYFMPPFIAATQAGVKSAMENYISINGVPVVASSKILRDLLRRDLGFEGFVVTDFAEIYNLNSFHRVAKSLSEAVRMSLTQTSIDMSMVAMDSNFITYAKDMLKDFPEYYDRLKESARRIIKTKIELGLYETPVPGAKYVKDVGSSAHRDVA…
unitig_0	g824	2381	unitig_0:2181024-2183405	SP(Sec/SPI)	GH3(125-346)	N	GH3	2	MLVRLNHLLLVSCATLWSIASSIDLPIPFPTTSGSPDASLDVRTDEILAKLTLDDIVGLMTQINIGSVFDNYALNETKVRQFAKARVGSFLDSPFSGNPINGSYGLNATEWRTVITRIQEINMEENGGHPIIYGIDSVHGAIYVHNATLFGQQINAGASFNPTLVREMGRITGEDTLAGGMSWIFGPILEVSQNPLWARTYETFGEDPYLVSVMGDAIIRGMQSTPGVPACMKHFVAYSKTVTGHDRAPVTLTDFDLLNYFVPPFIAAVKAGALTTMENYISINGVPVVASNKILTQLLRNDMGYEGLVVTDWGEIYNLYRHHRLVRTQRDAVATSLAQTTLDMSMVPNETTFIDHAKELLEFFPEYLDRMKQSARRIIKTKLTLGLYENPVPGEELIG…
unitig_0	g888	2252	unitig_0:2381167-2383419	OTHER	GT22(13-347)	N	N	1	MLEQLVRSRWVWLAIALFRVWNALFVRTAFNPDEYWQSTEVAHRMVFGYGYLTWEWQDDARLRGYAHPALFALLYKALELLGLDSRWAIAYGPRVLQGGLASLNDYFTYKLALVYFDQKTAKWTLVCHLVSWFIFYVMVRPFSNSIETICTTAALANWPWAFLNTRKKDDEEVDVNALIDSRRLKALSWAALGVLFRPTNAVLWIYLGGVHLLQSGDRARLLVKRVLPIALVTLGTMVIIDRVGYGEWTFVPFNFLKFNLLEGKDRLYGVHPWNWYFTQGYPSIVGTFAPLFLTGWLTAPALKKELGNVIFWTLFIYSWSAHKEFRFVLPLLPPALVYTGYCLRNLEQGLNRERPEGCESHQLERDPLGFVTRKYEFTTDTVSSDKEPLPDYIVLFSTT…
unitig_0	g905	2289	unitig_0:2429252-2431541	OTHER	GH3(84-286)	N	GH3	2	MSVDEMLGQMTQLDLSTILYPNRTLNVDLVRQHARLKVGSYLNAPTFTESDTPDTNSITPDAIHGFSAPEWRALIQEIQQIYMEEAGIPVLYGIDSVHGAIYVRGATIFGQQINAAATFNPDLVYAMGRITGRDTEAAGIPWVFGPILEIAQNPLWSRTFETFGEDPYLVSVMADAIVRGLQSNNQTAACMKHLIGYSKTPTGHDRDGVTISDFDLLNYFAPPFLAAIKAGAKTAMESYISVNGVPVIGNTKILQSLVRNDMQFDGVIVSDWAEIFNLHEWHHVAKSHEDAVRITLTKTPLDLSMVPYNTSFISMAKNVVQQIPELQSRIKTSARRLLQLKSELGLLDRPVPGESSVELVGSNGDREIALSLARESIVLLENKNKVLPLPKSSRVFLTG…
unitig_0	g921	1678	unitig_0:2481123-2482801	SP(Sec/SPI)	GT4(264-400)	N	N	1	MMRWTMTTTLAVLLGALRAVYALGKGAAVSQPPAVLWYAPFLSGGGYCSEAHSYVAAMESAIHDMQLAAEKEATEEKVDKTDGYGHFASSSSTDGDENEQEYKKLRPFSLYVTQHGDSYNAVFIRDLPNETRELLQEHWIEERDFHWRLQHQQVALAICHSEPGAWHPARYKTSDCPPPQALYKVGRTMFETDRVPSGWPDRMNAMDEIWVPTKFQEKVFVDGGVRPESVQVVPEAVDIHFFDPAKVEAPYDLAAAITERTVTQDTTVFLSVFKWEERKAWRVLLKAYFQAFKQDDDVVLAILTNAYHVASESAKDFRDIMDEFAQAEVGKSLQDLPYVHVLPPHLPQEQLPALYKSASAFVLPSRGEGWGRPHVEAMAMELPIISTFWSGTTEYMTEE…
unitig_0	g947	3820	unitig_0:2531288-2535108	OTHER	GT20(157-633)	GT20	GT20	3	MKKTRAHSLDDDASSGLVAPTGVRRGASPRSTSNDALPLASYLEQQRQLQRRNSEEDDEGASEDESEEESSGVDASDDLESDMDGTTPVTSGTVRRSRKASTSSQQFTYDEDDIINMNAREQELLANIQELQRQLSMVQIQTEKPQEEIVPPMVDSRQRRLIMVSNRLPISFQRNETTGEWSFKMSSGGLVTALNGIRDQVPFIWIGWLGEEIAQEDQNKVREKLAKEFNCVPVFLSKEIASRYYNDFSNDILWPIFHYVPLPLFRAGDEKKFDFRLWDAYKLANKRFAQAVNQVYRDGDYVWIHDYHLMTLPSLLRKRHPKCKIGWFLHTPFPSAEMFRQLPVGKQILEGLLGADLLGFHTYDYARHFLSACSRIQGATTSPKGIEREDHFSSVGVFP…
unitig_103	g14770	1242	unitig_103:3929-5171	OTHER	GT62(115-350)	GT62	N	2	MLVGDAQWSSQLQRRWRQLRLTVRVLSSRQRLALATACLLLLCLWGWPRPPAESVLHPRTPSLLPRIGFAHRIHSDRQQLSPQQARIRVSSESFAQYGTDERGLHYRLENDELLENENNRAQDSVLAIVVLNDAASWGEQRTVEDFFRLLQSFSYPQHKMSVAMLTSSKSEFDRIQQVMQHAISQYAQLTLLYRSDFNMDERLNRENRHQHALQTARRRMLARYRNFALLSTLQPWHQHVVWIDADVHRIPSDLLSRMIMLDRDILEPICLRDKADKSGTYEYDLNAWVGRRKTPSLWQSRSDFVPGDLSIQRMAQYRNGPDDVVPLDSVGGTMLYVRADVHRQGVLFPHHHIVGSEWEGEGYDGIETEGLCYAAHFLGFRCWGLPHDAIFHV
unitig_103	g14832	1040	unitig_103:145076-146116	SP(Sec/SPI)	GH131(30-256)	N	N	1	MRFTSVLSSLAAIVACVATGVNAQSKSLPWDGRGQDLTVATLGDKYMLHILNQRMGGQGNPADYVTVEPTGRSPAYNGDTGVISVGVDEKAIFNGQTTFRRSELVQNVKGDTGGTTFFRASIMAKEALQNKYMWQVYFPESHNWEVFVDATKTPQMIQFRTDANVRWETEFTPGTWYNFGIALQSSGITLYQSEGDAALAKAYSTDKAFSVPSDTELHYGLLTLSTDGSQPAMVKNHQDILYFNGVTVETSVSGTSGSAPAPAPSKTPKPSTTTPASSTPATTAPASSTPATTKPASTTPASTAPATTTPATTKPATTTPATTKPASAAPAPSPSPSSGKCLRRRD
unitig_18	g13830	923	unitig_18:14361-15284	SP(Sec/SPI)	GH17(45-300)	N	N	1	MKTFLLALVLAIATLCISVNVVEAKGVCYDPIHGSAKVTRNSINADLRRLREAGFRSVRVYTATLVNENLGKRIIDNKMNAAITVPFVNDRPGDSESHIKAAIEAAKYRVGNNRVTHIYVGNENLASVNAVPQKMFDYIARIKAAVPSDVRVGTVQRNTEYLDPARNGMSRLKELLSKCTIVGVNIHPVFTPNTPANKAINVVNAQWNQLMGNVSNRFPGLSGKIAITEVGWPSGGSLNGNTGSKSGALTFMKAYAKWRRNNIIEGRSFFFQAFDQPQRTDGPFEKFFGVFNSDRSKKYSSFNFNDM
unitig_18	g13832	920	unitig_18:16942-17862	SP(Sec/SPI)	GH17(34-303)	N	N	1	MKTFFLALVLAVATLYLSVDVVQAKGVCYDPIHGSAKVNLNSIKADLRLLRDSGFKTVRVYTATLVNENLGKRIIDHKMNAAITVPFVNDRPGDSESHIKAAIEAAKYRVGDNRVTHIYVGNENLASVNAVPQKMFDYIARIKAAVPSDVLVGTVQRNIEYLDPARNGISRWKELLAQCTIAGVNIHPVFTPNTPANKAINIVSAQWSQLKGNVNNRFPGLSGKIAITEVGWPSGGSLNGNTGSKSGALTFLTAYAKWRQNNVGDRRSFYFQAFDQPQRTDGPFEKYYGVFNSDRSTKLSFNFNNL
unitig_18	g13833	920	unitig_18:19624-20544	SP(Sec/SPI)	GH17(34-303)	N	N	1	MKTFFLALVLAVATLYLSVDVVQAKGVCYDPIHGSAKVNLNSIKADLRLLRDSGFKTVRVYTATLVNENLGKRIIDHKMNAAITVPFVNDRPGDSESHIKAAIEAAKYRVGDNRVTHIYVGNENLASVNAVPQKMFDYIARIKAAVPSDVLVGTVQRNIEYLDPARNGISRWKELLAQCTIAGVNIHPVFTPNTPANKAINIVSAQWSQLKGNVNNRFPGLSGKIAITEVGWPSGGSLNGNTGSKSGALTFLTAYAKWRQNNVGDRRSFYFQAFDQPQRTDGPFEKYYGVFNSDRSTKLSFNFNNL
unitig_18	g13834	926	unitig_18:20783-21709	SP(Sec/SPI)	GH17(39-301)	N	N	1	MKTFLLALLLAVASLCLSINLVEAKGVCYDPVHGNSKVDLESIRADLRRLRDAGFKTVRTYVATHSNQNLGIRIINHNMNAAITVPFVNDRPGDSEIHIKAAIEAAKHRVGENRVTHIYVGNENLASVNAVPQKMFDYIARIKAAVPSDVLVGTVQRNTEYLDNARNGISRWKELLAQCTIAGVNIHPVFTPNTAADKAINVVNAQWTQLNSDAIKQRFPGLPGKLAITEVGWPSGGSMNGNTGTKAGALTFMNAYAKWRQSHISDRRSFYFQAFDQPQRTDGPFEKFFGVFNSDRSNKFTNFNFNDL
unitig_18	g13835	917	unitig_18:22563-23480	SP(Sec/SPI)	GH17(45-298)	N	N	1	MKSFFLALVATVCLSVSSVQAKGICYDPVHGNTNVNADSIRIDLTRLRDAGFKAVRTYVVMHSNQNLGMMIVKNNMNASLTVPFVNDRPGDSEIHIKGAIEAAKHRNGAARVTHIWVGNENLASVNAVPQQMFDFITRLKNSVPKDVLVGTVQRNTEYLDPARNGIGRWKELLDRCTIAGINIHPIFTPNTPADKGVSVVNAQWGQLFSEDMKKRFPGLTGKLAITEVGWPSGGSMNGNTGTKAGSLTFMNAYADWRKRHVDEQRSFYFQAFDQPQRNDGPFEKFFGILESNGNNKFTTFNFKDM
unitig_18	g13865	2480	unitig_18:91149-93629	SP(Sec/SPI)	GH81(154-816)	GH81	GH81	3	MKLVRAVAILAGLIAVQGQVFAQGGDDGFMDARQVGKVRPGGPVADDADVTPAPKPTPAVTGASRAPAPVPTPAPVPSAAPSVAPTAVPSAAPSVAPTGAPSATPSKAPTPSGAPSPAGNMFKPFSTEKPSDLFKPNDGLAKLAPIVNVKADLLTTRPIPTNEWWGNLIHTTNKERGISSNPAWANPYALKLPVGKAPFGIQACYSYTYRRKAELKDDRIKFYLHEYHNDVTLSATEFAAVPSYEVYDWSDLGINLRVCAPGGGKCMDSALVNGMSFISATYDGLTPRVVTEANVTKLEESNGKFVITMDNKQTWVLYAKGAKFTVEGDKKAVVASGAFTGMVRLAILPDGAAADVYDSYAGCAVRGGMVSVQSRTDYSLDWEADGETCASNGLLHFAF…
unitig_18	g13919	2426	unitig_18:254339-256765	SP(Sec/SPI)	GT31(102-304)+GT10(621-772)	N	N	1	MAMMRSAQRTLWTVLWTTLAAVLVGVEANGLASIVEEVGSLRHEAVVAWDGQVLEEPSVENELVAWANTQSFIPEDRQSYRGVERAFLLIGVKTSVLHAFPARQAIRETWAEVAWLAQHDVKVLFLGCEPDLSGYDVTQQRKLQDAIALEKVRYGDLLTDELHCRDSYALLLDKVVAFFHYAATRWRFAFAMVTDDDIYLRVDRMVEILEQQNTTGRFYAGNVCSVQNRAPLLPQRDPTEKNYVPHEVYPMTELPPFALGPHYLLSADLVHYISRNRRDLRGFGSVEDVFVGLWLLALQVHPVHLPQFQDLRYALCSVDLVSLASLSPAAIRRVQDNLNQGLSFCAGSTHTGWLKQVSEANLPASSQSKAEWEALEYQWDIAYHHSTRDLELLINFTRP…
unitig_18	g13961	929	unitig_18:356222-357151	SP(Sec/SPI)	CE4(83-243)	CE4	N	2	METNMRIMLLLLSVHALAVHAQPTVDVVGESVVLPPSPSTLGSLAFLLGLVAFLLAVVYLQPAWLMALVVRHSHPSVLWCVRTSNNVCALTIDDAPSPATPMILDLLKEHGVKATFFIISGNITGNEEVMRRIVREGHLLGNHLTEDRASIMDELHIFEQKIRVCDSAIGSFQTPSSDDTAQEPVEKPEEEEATASTRLLSEGNSTTYEGSSFKWLRPASGWFTSDMRDVILRHGYRICMGSVYPHDAQIKWEAVNSLHLRMCTRPGSVIIVHDRAWTVGVLRSALPKLVDKFRFVSLDELTTHHQKPT
unitig_18	g13993	1274	unitig_18:422289-423563	OTHER	CE9(12-395)	CE9	CE9	3	MTERRESRVLKFTNVRVLRDGQLRNEYFWVADGKVIDPQSRFWQRHSEVDHAPDEIIDGRGCILAPGFIDVQINGGFGLDFSSPAISESEIEFVAHNLVSTGVTAFCPTLVSSSAEVYHAILPKFRVTSDGEKRRAANILGVHLEGPFINVECKGAHDAGVIVAPTNGLKSLEERYGPLDHVKIITLAPELPGAMDAIQALCERGIVASGGHSQANVDVAIKAVGAGMRMLTHVFNAMGPFHHRDPGLIGLLGLTEKRPFYGLILDGVHSHPTSARIVRTCHPQGLVVVTDAMAGMGLAPGAYDLAGQQVEVREDGAYLAGTNTIAGSAVTMDSCIRTMVEYTGCSVVEALEAATLHPAQVLGIEHKKGTLAFGSDADFVLLDDSLHVKRTYIAGELVY…
unitig_19	g5746	1809	unitig_19:58766-60575	SP(Sec/SPI)	PL3_2(354-535)	N	N	1	MRRVWVWVALALLAVATEGVAADNQYWKGNTNTNNNPAPAPADNQYWKGNNQNNNNNNNNAAPSPTTENPYWKSDPNNVWWVGPTGAPPAPTPAPAPPTTQPTPPPTPKATPPPPPPTPSPTPKPRPPLIPPPTPPSTPSTTAPPPPTPSPTPKPRPPLIPPPTPKPTPSPIATASSAPPPVPTGFDDIDNGGYKPGEAHGRDPSEDPWKHSPRPKPVQPKPTSTPEPTDDDDSASDTEPPAPSPTPTFRPVPKPKPTKTPKPTPEPTPEPTPEPTPEPTRAPTPDPTEEPTEEPTEEPTEEPTEEPTEEPTEEPTEEPTEEPTEEPTEEPTEPTPAPETPAPAPTLPDIWPTSAGTVQLTAPHVVAAGETFDGGMKLYERSDIACDADKQMASDDAVF…
unitig_19	g5835	1753	unitig_19:244692-246445	OTHER	CE2(192-408)	N	CE2	2	MRHRPAAWSWRNSAYGDHSRASSSTNNSQPLEENRDRVHNFDIHKYKDGCYLFVPASATDKIRYVGRFLHHGTTTKRPTKINSVQFDWSASSIAIRVTHTSVVAIRMKGDGNYFNVFVNGSFRCILRASLNATCCEVATNLDPAKEYTILISKRTEPQMRGALSTFKVCTFYGFIVDEEAVVLPPPAESKRKIEFIGDSDTCAFGNEGLVSSARKIFGMKGRMENIYNGYACIMSRMFDAEAHVVAWSGKGVHSNRADWGPNMLALWKSTLASREGDWEMSSWVPDVVVINLGINDLSPPASSETDIVAAYALLLAEVRSYRPDADIFCVVCDEGCISSEDDALDRSRLSMQLQEIIKVAMSKVSKYDSKLHFTQIKVNGGLDPADYATFMHYAVSGHV…
unitig_19	g5862	1910	unitig_19:311786-313696	OTHER	GH47(138-581)	GH47	GH47	3	MRSPTRDKRRAPRASVGGLLPDHMGLSSSNPRYYWQRLGMFAVCVCVCVFFWMQYNVLTAGLLKVPTTGSGREQLTDAPSSEHLAHLRVPKIPSPTVGYQGLEGEGGRPLGQLPPVHYDDVITPGIQEDRRFAVKTAMQFVWRNYEKYAFGADELGPLNGARRENVWGNISCSMVDAIDTLWIMNMKDEFYRARDYIAERLHFDHLGEKNTKISVFETIIREVGGLLSAYSLSKDEVFKVKAKELMDLIVPAFDEKEGVFYTFLNPQTKKKSFAIWAQLRAHIADVGSLQLETRYLSDITGDPKYAAMGEAFYDIVRREGSYKGTGLFPTYFDSTTGEFDTHSGSITIGALADSFYEYLIKVYIYSGKREKDASLRKLYDDAVAGMEKYLLKYSESVDL…
unitig_19	g5955	1334	unitig_19:534269-535603	SP(Sec/SPI)	GH17(105-346)	GH17	N	2	MQSNAHPHGLASFMFSVFLLLYSIYSCEALVQDESLPAFDLQPWREEAMAHEESAKYEAAALSNVIPGACYSPFHNAEYPLFGGSASGLNAAMYADFALMKNYVSVVRTYYSSYYGIPVTPAAAASGVKLYLGVFMTDENWYGGQVDDAINAVKQYPDTIVAILVGNENIAPVGPYSPQDVAKRVAAVKQRLRDIGRGDVPVGTVQRATDWLDSPRRNDMLALAAACDIVGVNIYPFFDNNYDAAYPLVILNGVWDLMLQVYPESKLRLTEVGYPTGGGAPSYAPRNIPSTANAQRFYNAFINWNPSRGGGEAFWFMFFDRRPDDNSMQAELEKYFGFFTYDRKSKAPDFPARLTAINQAAAQVTVSTPTPTPAPKPAPVPTTTVPRTTTPPPKTVPRT…
unitig_19	g6128	1520	unitig_19:1041804-1043324	OTHER	CE10(173-446)	N	N	1	MKILPSARLWGQQHGVSAAYLAFAVLMLQLARRGGTKEVVRDNLVSFFAAVVPTELAHKLLAMNALVIYKLREAHTPLLSSWVGSLAVFCHGLAILKFLQNNRENVSAKQFIRAAMEQQSDIAHEKLRAIGNLSLQEWIGVVLPLPQPMALSLAYAGVRKIKTVTFAHVGENRTSKLRMDVYKHDKTPPNAPILVYVHGGAWMFGTRERAPLPLLYQVANHGWVVCSVDYRLSPKVAFPDHLIDVKRAIAYLRQNARNEFDADPEFIAVAGESAGGHLASLVALTATDKSLQPGFEDVDTSVRACIDNYGVHDFLDRHGLYFYKDKGHGFLKMMEVVIMQRPIKESLEQYEQASPVSWLMDDKHCEAKQGQLVPPFLLSHGTHDTLVPFDDSSIFYEKL…
unitig_19	g6165	2276	unitig_19:1136592-1138868	OTHER	GH81(37-747)	GH81	GH81	3	MLTTSGTPPPSALFAWTDALQELIRPNNVPLLGLNASERPPIPTNDWWGNLLAWKANERDSDPIFANPYVYLLAKDRGLSLSYLHDYRVDGPVNENDAIKYYFYPATIKNLVLSATEWTPSTGVQMEIQSWDDMGVTLSLSEKATTPHTSVARYAKTYLSMGNAFTTMEYRDLHAQLQSDHGILTVNNVPIHENQVVTGESFVIEFNNGHKWLAFYYPDNQVMPGQRGVQLRMHHNTLITTAPFTGILQVTYVSSTKDHGVNEHAILDLYRSAAGVYPVATSLFVQDADSFGYEWTLRDAQQGEACRSETHLHFALRHLQQMMDTSYVIKKPELALWSHTRGIMQAYTIRATGDGKAQWRFHALQDISAAVDSQATSFLPRGRLSAQDVQELRLVDILT…
unitig_19	g6243	2593	unitig_19:1334868-1337461	OTHER	GT90(292-589)	N	GT0	2	MDERPSVRGIFAFEDEETLEWRRVVLTDGSGGLPKFATKSECEDFVRRHCWRGSNPDYPTLQHVFTTLVDWKQIEEVLLPKINEYDQRHPPEAPGSINTHNRFLYDHGAKLTAGVDARLNLPFHHQTNRESTMNTIKYMFHHTRSGIFVMIRRRRVVVFAPFVNREYENTWGEQLQLDSSDGSVQQYHREKQRHHGREEYETDARKWWNDGSAIHMDDLRGPRGRDAAGKNPQYWDDYHLTQLRDLLEDACQHRSIPDCEFFINKQQHPHLKDNASEPFGFLFNKDDNDENEDMPRQQHVYSTYAPILSFHSSKRYADVPIPSSVDWETATGLLFPQSFMHSHCDQCQCGDSINCENQWECYCDTNDHGVKPHGIEAVRDLFSAGNRLKSTRAWDEKVP…
unitig_19	g6265	885	unitig_19:1386177-1387062	OTHER	GH43_26(1-127)	GH43	N	2	MIAEPKYSFEQNGKINDGPEILIKNGKVFMSYSANGCWTNDYKLGLLWMNEEDDPMNAASWQKVDHAVFVGNGAVQAYNPGHNSFFKSPDGKEDWLAYHAAATGHEKCGINRFFNAKLITYNEDGFPNFGGPVSSGHLLPGPSGEPDLPTGDVLKNGVYKSGLKVQQWSALDNNCQKFIFHNVGDNYYTISAVSGGMLLTTKDCKKDPTTGVWFFKPTGQDCQKWRIVSHGDDEYSFISKSANLAFDLRAGNNANGADFNVWNTTYEWTQKFHLTKV
unitig_19	g6303	1213	unitig_19:1468863-1470076	OTHER	GH43_26(2-237)	GH43	N	2	MFWAPELHRLDNKWYIYFSAVQKPDQAENVWHSVYVLENANEVPYVGTWTYKGQLKDTQNDHWAIDATIFQLRGTNYVWYSGHADNAQTGVQRIYISKLQSPWTPVPGRTMIAQPQYSYELNGNINEGPEILIKNGKVFLVYSANGCWTNDYKLDLLWMNEGDDPMNAASWHKLDHPVFEGSGAVQAFSPGHNSFFKSPDGTQDWLGYHAAATNTEGCGINRFFNAKVITWNPDGFPNLGGPLSSGRLLAGPSGEPGLPGGAVLANGVYEIVLQWDVLKNDCKFGFQNVGGNYYAISALSGGMMLTTKDCKNDPTTEVWLYKPTGQDCQKWLVVSHVNGEYGFTSKSANLAFDLRAGNKANGADYIVWTATYEWPQKFPLTKV
unitig_19	g6313	1352	unitig_19:1489566-1490918	OTHER	GT60(111-418)	N	N	1	MMVSFKTPMSALGLPQSSLHAAEEQRTREKRQRRQRMTLFAGVICVLFILNELIAFGPRIGGTTETIQTAGRPELEGQTLQGASTLPVGSNTRQNRTRSEEVVGFRNEKKIAVLLTSVGDTERCARTLAAARDLAFLSTRIYFRVFEELSAVDEESCLQLFKTLCPREYAKMVRTKQLRFVRRDASGAMGPSVSKHIVEGLVEDKLFQDEFYLSVDANTVFTKHWDLELLKQWYLIGNTHAILSVSPPPIEFRGLSNNTLFVQCSARIQSTDPDAIVAFNPPEPRVQSRRVHGPVLHTQYSELFHFGTVSSLQTVRSDPYLSHLTVGHEYMRATRFWTHGFDFYTPSKHVLYRRYEEPMTIQEVGRNDAETQRASRRIRRLLGLTVSFSGEALEEVATY…
unitig_217	g14915	1385	unitig_217:14287-15672	SP(Sec/SPI)	GH152(122-356)	N	N	1	MISPKFFCVALALLGSVRAEDEVVDRSVVHNSHVSLLEVVNNKTEVIVIPPAVAANHKAATSAAATRQVELYNNCGYEVQYKWTSGFNTPANAFFPIPSPGPNGYKLKTQERYTATFLALVGCGVANAGPMTRAEWTFVPDGTDFYDITVINGVNIPMKMEPIGASYNTNDPYKCGIPGRIESVTSGSGCSWDYAKFQSDFHYNAVAGGSGKACSSASGCSGGEVCGYKFVPGVGLGMFCGVRYGFYTANQVCALDNGNSYFKCDQSAGDATGLKVRDMYGCVGPWYLSGYQPASVGQDGKTEKCKVKNPKWLEKIAPNLDFLKKACPTTYTYPYDDMTSTFVCPGEKKFRITFCPSGTTSTTPTPTTGPTPTPQPTQTPAPTPGPGGKYVYIGTSPDK…
unitig_26	g6953	1256	unitig_26:115436-116692	SP(Sec/SPI)	PL1_4(115-308)	PL1	PL1_4	3	MKLLLLTLAILHTTAHAAAVPGLAAGTTGGGDVTPVYPKDIDELTKYISDKEPRVIVLNKTFDFRGSAGNKTETGCEPQFYRDCFAKNNGFQAQKVILTNTMTTTGGCDNGKPTTITYDLATKNPLPVKNNKTIRGEGKKGVIMGKGLWIQGNNVIIQNIHITELNPHLVWGGDAIYMQGTESGETQERVWIDHVKVSRVGRQMLVTGFAGVKSLTVSNSDFDGRTTYSASCDGRHYWTFIYDGKDTRVSMINNYVHSTSGRSPKVTSGEGSSIVHIANNFWDDNSGDTSFDVYGFGYVLAEGNYFKDTKNPCVLKDSSDAKIFVTSSSNTATCKSVLGRDCVANTEENSGKLTGKNEQAALDKIQDVAVYKPGIATKLELSVKNWGVGDLTSDKTIEN…
unitig_26	g6954	1175	unitig_26:116945-118120	SP(Sec/SPI)	PL1_4(116-309)	PL1	PL1_4	3	MKLLLLLLATALLHSIVDGAVPGVAAGTTGGGSATPVYPKTIAELKSYLGDNQARVIVLNKAFDFRNSEGVKTEIGCEPQYYRDCVAKNNGYKSQNVILTGTMTTTGGCDNGRETTVTYDIAGAKNPLPVKDNKTLRGEGRNGLIIGKGLWIQGNNVIIQNIHITELNPHLVWGGDAIYMQGTSSGATQERVWIDHVKVSRVGRQMLVTGFEGVRSLTVSNSDFDGRTDWSASCDGRHYWTFIFDGKDTRVSMTNNFVHSTSGRSPKVTSSTGTSIVHIANNFWSDNVGQTSLDVYGAGYVLAEGNYYKDTQHPFLAQSSGAVFVPWSSNAGSCSSVLGRVCVANQLVNSGSMVGYNDATALSKMKGIATYSPGSAKTLVLSTKNWGIGDL
unitig_26	g6967	1577	unitig_26:150719-152296	OTHER	CE10(207-470)	N	N	1	MAKKKTRRAPAKDSSTASTASTASPVAVDATPDSILGALADVQQLAAIDDQYSDSEEPVVTSFEPKKATEDDDEPLIVPTIKTFELDSAALSAAAREHIDQELHATPNRSRTTSSSSLTQSIASLPRTRSLTLEDHATVLQAVPSSRAEVVEVVAEQSWIVTKLTVQLLWALRMSYKWMFMALRLIWFVILLLPAFLVMVHYYLLDGHVHKNIVYGLNGRNLLDVYTVRPSSSTSSAPTRRPVVVFLTGGAWIIGYKAWGALIGRVLSSFGIVVVTPDYRNFPQGVVPDMVEDATCALQWVFENIQHFGGDPTNVTLVGQSAGAHIALCALLERVEKRKERLSPESSEINSEAVDLATWDVGQIRSVIGISGPYNIEASISTFHRHGFDQSVVERIMDH…
unitig_26	g6969	1187	unitig_26:158784-159971	SP(Sec/SPI)	PL1_4(119-313)	PL1	PL1_4	3	MKFLRTGVFALVAVIVQSVADAAVPGIAVGTTGGGSAKPVYPKDIAELKSYLSDSQARVIVLNKSFDYRGSEGSKTETGCEPKSYRDCVAKNNGYKAQNVILTGTMTTTGGCDEGKATTVTYDIAGAKNPLVIGDNKTLRGEGKKGVIIGKGIWIRGNNVIVQNIHITNLNPHLVWGGDAIYLQSASNTAPQERVWVDHVKVSSVGRQMLVTNGAGTKSLTVSNCDFDGRTSYSASCDGRHYWTFYYEGKDTRVSMLNNFVHSTSGRSPKVTSAAGNSIVHIANNYWSDNSGQSSFDVYHSGYVLAEGNYFDNTANPHVATTSDSNVFVPTSSNADSCKSVIGRACVANAVTSSGKLTGTNEATALAKMKGVATYTPRAAKKLLLSSNNWGVGDL
unitig_26	g7072	1433	unitig_26:490457-491890	OTHER	GT4(231-367)	GT4	GT4	3	MSVDLVRSSMESDERPTYRIAMCCDFFYPRLGGVEMHLWSLAQCLLRLGHKVIILTHAVDAPASPSSTKRPLPRQRVGVRWMTNGLKVYYLPITPIVDNVTYPTFVGNFGLFRSICIRERIQIVHGHQATSTFMHECLIQAKTMGFLRTIYTDHSLFGFADAASVHLNKVMKFSLSTIDHAICVSHTCKENLVLRASLSPDMISTIPNAVDASKFTPPTTEPSASSSTINVVIISRLVYRKGIDLVGRAIQIVCAATPNVNFIIGGDGPKRLMLEEMREKHRLHDRVHLYGAVPHANVRDVLCQGHIFLNSSLTESFCIAILEAAACGLFVVSTRVGGVPEVLPPDMIEFAAETTPEALAQAVLDALPRAAKVNRQDFHDRVAKMYNWNDIARRTEDVY…
unitig_26	g7140	1786	unitig_26:688090-689876	SP(Sec/SPI)	GH17(42-303)	N	N	1	MVRVLTSALVAAASLLANAAAYDFKIYGINYNIRAGPDWAAADQKCKKIEQIEKELKIIKSITDIVRIYSLTDCDQGTVVLPAAVKAGLQIELGLWVGKDNAGYSGERDKLVELLKNKDLINDKNIVSVHVGSEAIYREDVTAEQAISNFNEVKKLWTEAGNKAPISIGDISDTFLAYPELIKAVDFVSANLFPFWETEPIDTAVSHFWERYQDLEAVVKPEGKEIVIGETGWASGGKQSGASEASPENAAKYFADFYNLAEEHDLKYYYFAAFDEAWKIHGAKEDETVEGYFGLFTSDGVLKPEIANIEFSDVVENAVNNNAATTTTTTTTTTTEYNYTFSYSGSWSVEFHGTDDDEGSEESEEDESTNSTETTTSSYEEEYEIEIEIEGGDQPTPKP…
unitig_26	g7141	3690	unitig_26:690750-694440	SP(Sec/SPI)	GH17(42-301)	N	N	1	MVRVLTSALVAAASLLANAAAYDFKIYGINYNIRAGPDWAAADQKCKKIEQIEKELKIIKSITDIVRIYSLTDCDQGTVVLPAAVKAGLQIELGLWVGKDNAGYSGERDKLVELLKNKDLINDKHIVSVHVGSEAIYREDVTAEQAISNFNEVKKLWTEAGNKAPISIGDIGDTFLEHPELIKAVDFVSANLFPFWESEPIETAVSHFWERYQTLDEAVKAEGKEIVIGETGWASGGKQEGASEASPENAAKYFADFYNLAQEHDLKYYYFAAFDEAWKIDTAREDETVEGYFGLFTINGILKPEIAEIEFDDVVVMTNTSRTSGWNTSPGIISLDVFDILNSSNEDHTEGDESSDSVEYVEEVEEGEDEVEEEEEEEEEDATSLVSISNSSTTTTTQV…
unitig_26	g7182	6713	unitig_26:776025-782738	OTHER	GT48(863-1608)	GT48	GT48	3	MQQTPDGPTRRRASSNYFELDADRRRNRSERSERFSARLTGLDVGSSSTKYSKAPNSANLRTLTGATSYEIDDDEASIDYCADKLKAKFGFQEGSVANQREHVMLLLANGKARCKPSDAPDHHVIELHKKIMGNFREWSKFLGVKPMFYEGKAEGDLKHPLHMDILLYFLIWGEAANLRHMPECICYLQYQMMSMVNQDPYCQDGRPEGWYLTYVVRPIWTECSNMKRKNSLGKPLEHVQIRNYDDINEYFWKPHCLSVDVEHVGTVLTNTHGKTFYEHRSIFTLVLNYYRIFQFNLMFLVLLTVLAFAASISPSGGQTGFSQFKSLGDTVFPYTSRDLKLAVVSIVFSHAALCLCKCFLEVAHGWHLLTAKEAKASSSRSFTYGTALVLRLLWNAGFV…
unitig_26	g7199	6812	unitig_26:834904-841716	OTHER	GT48(881-1611)	GT48	GT48	3	MAQAAERRRAGSNYFQLDADRKRNNSQHYGQQQPDQGRFSTRLSMMDVGQPMQGGYGGPQGGYGGPQGGYGGYDGGDFGGPQGGIPEVQKPLGGGMQGDFDDEVSVDFCCEVLFGKFGFQSGSVDNQREHVLLLLANGKARAGPSDSPGKHVADLHKKLRSNYVEWCEFIKVKPLNYVGQPQGDLKNPFHMDIMLYLLIWGEAGNLRHMPECLCYLYHQMMGMLNRDFLGQEKQPEGWYLRQVVRPVWKECSNMTRKNKLGKHLEHVKVRNYDDINEYFWKKHCLNIDISQIGSELTNNHGKTYYEHRSIFTLVLSYYRIFQFNMMFLVILTVLSFASAISPSGGKFWFAQFDTLGQVVPPYEERDLKMAVIAVFFSHAAIATFKCLLEAAHGWHLLVS…
unitig_28	g6366	2736	unitig_28:88105-90841	OTHER	GT66(65-696)	GT66	GT66	3	MAAKGKSKKTEAPAPVHDAHPHAKEHTTHEPVVNEAPVEKLVFGVSLDDEHDIEDESNVLAPIAKYAILGMICLMSFAIRLFAVVRYESVIHEFDPYFNYRTTKYLATEGFLEFLDWFDDRAWYPLGRIIGGTIYPGLMYTAALVYWILNLFNISINVRNTCVFLAPVFAANTAIASYLLTKEVTKRSSAGLMAAAFAGIVPSYISRSVGGSYDNEGVAIFALIFVFYLWIKAVHTGSMFWSASCALAYFYMVAAWGGYVFIINMIPIYVLVMLFAGRYSPRLYIAYSTFYTLGSLMAMQVPFVGFNVIKQAECAGSHGVFVLLQVYCFVNWLRNFISADSFRRLVLFGAGIIVASFALILLVLQFLGKVQWTGRSLTLLDPTYASKYIPIIASVSEHQ…
unitig_28	g6424	1392	unitig_28:223847-225239	SP(Sec/SPI)	GT4(244-403)	GT4	GT4	3	MLVLTGLLLAVLTLVGIAYAFVAGLRCSTKRRDGKAPSSPLRVGFLHPDFGIGGAENLVVNAAIALQKKNVHVTVFTAHHDVSHCFEETRGDGPLAKCIRVHGDWLPRTILGKLYAFCAILRILYVTLVITFVYANEIDAFFVDQVSVSIPFLRFIGKPVLFYGHYPDKLLVIQSGSKLKHLYRLPLDTLEEVTTVCSDVIVVNSKFTRSVFEQAFPRVGRRELGILYPPVDVSVFEQYVPTKPRDPNLFVSLNRFERKKNVALAIHALARLKSLVPPETFALVRLIVAGGYDPNNVENIEHLKELQQEVTKYGLEKHVEFRTSVSDSMKKELLSTAQAIMYTPDKEHFGIVPVEAMTCGTPVIAVKSGGPLESILDGETGFLCEVNADAFADAMAKVC…
unitig_28	g6488	2238	unitig_28:361091-363329	OTHER	GT60(351-634)	GT60	GT60	3	MEKKTVLNVLSPQLQALVEASLGTTLPTGDTRKKEDGVRATAGAGDAVEATNETAQDPPARTQTDAVQANTTSHIGMDAPLQASIVSTVKLNPSELFVLKHPDSPGFIVKDRFLGHSDAARVRNALVQFAKSAEFHQAGVGYGDNKRHEQAARGDRIHWIQRPRDLTRPDATLDAAIVHLLRQVERLVVGVKSAIPELDLRNVTSTQLAIFPGDGSRFVKHTDTYSSNHPSAKGSDNLVRLITCVYYLNPDWIPAHGGSLRFFVDDKQQWDVPPVLDTLAVFRSRDVEHEVLPTFHERMALTIWYYGPASAANAPKIPQLHPAISSFLAPPAPPQVKPQASTTPSSTQEMIFVAIPSYRDPECPHTVADLLAKATHPDRITIGICLQDEDDTMLEHLKE…
unitig_28	g6586	1001	unitig_28:572645-573646	OTHER	AA2(77-319)	N	N	1	MFRRAALRAMKQASAASATRTFASAGAKQTKTKSGAVALAVAGVATVGAFAIADVAQAREKHVDIDQIKKEIVEIFDGNNYMGPTLVRLAWHSAGTYSKKDGSGGSTGGTIRFDPEINHGGNAGLHLAVKALEKVKKNHPEISYADLYVLAGVAMIEEMGGPSVPFRLGRPDATSGKECTPDDRLPNADMGAKDKNSNHMRDVFHRMGFNDREIVALLGAHAIGRCYPDRSGYSGPWTNAEWTFSNEFFRLLLETKWTPKKWNGPKQFEDPSGNLMMLPMDLVLVEDPIFRKYVELYAKDEELFFKDFSDAFLKLTENGVKFPEEKRKGWWPF
unitig_28	g6666	1344	unitig_28:777878-779222	SP(Sec/SPI)	GH17(79-332)	N	N	1	MALHAESWLRRIVLGLLLFLPTTPLSKPPLNPHIMVNAHVWTALTALLAASTTTTSALDKELYGVNYDLRQGPDWDPAKCKNAKTIASELKVLSTITKNVRTYSLADCDVTPVIKSAKELGLTVWLGVWISGESKVFEAEVETMKELIKAGLIDDNIVGFNVGSEAVYRKDVTAEQAIADLTEFKKLLKDNDLAQPVSITDIVDVMLQYPEMIEAGDVVTVNQFPFWEKMDVKAAAAQFRKRIQPLLSLAGKKEVIISETGWASAGKNENASDATPESSARYLNDFYLVAEEEKWKYYYFQAFDSPWKAQIPGEEDTVEGGFGIFDKDGVMKPEFGDLKISPREDTITDVGSASSDGAAGTAGTNGQTASSGNGAVHASSGSGASGTNSNSNKSSNKSP…
unitig_28	g6852	2258	unitig_28:1251231-1253489	SP(Sec/SPI)	GH13_32(351-539)	N	CBM21	2	MAFLPGPTMALVASVLSLLLSSLVDAQSAGVHIFYKTAWKSPKIHYSVNGIDWSMPPGEALKPSADASMPADQGWFQFDKTDASSLVFTFNNGNNNWDNNGESNYRVEAAGVYKFGTGGAASSAPAPAPAPVATIPKATPAPAPASDAEIATLGTCGVFTDSCTGKSYPESTETRRWQTPPRGAAGWTEEFQDMRSLEGYAHVEYAADRQSATVDVRTFLRDSKDVKCTYLFNKEGDFTSSYKATSALKDVLDIVVTCTQSNTNEEWSLKLDPINFVWQNTEVKQPESMEKGQKGAIVDLFGWPYKDIESECKDFLGNAGYMGVKINPPQETVLSDVWTKDGQRNPWYLIYQPVSYRLFSRMGSRDELRSMIQTCRANGVRVYADAVINHMAPGGNDLN…
unitig_28	g6854	2582	unitig_28:1256873-1259455	SP(Sec/SPI)	GH13_32(457-636)	N	CBM21	2	MAVPRASALLLATLVVLATLNVNAQDAIKIFYKTAWKSPKIHYAADAGTWTTSPGVSMEPSTDASMPAKSGWFQFQAPANTKSLEFTFNNGEDVWDNKDGANYKIDKAGVYKYECPATKTPDNGIHIFYKTSWKKPMIHYSINEGDWSPSPGVAMEPSTNTSLPAKDGWFQFATDASADTIEFTFNNGEDVWDSNERSNYRVDDNGVFTYECPPDIDNPSQVPSPSQTATPSDAPSTPPSPSSAPSPKPSGSPAPSPPDLGDCGTFQDSCPGISYNESTESRRWQTPPRNSSGWSEEFQDMRSLQGYAHVEYSADRKSATVNVRTFLRDSTDVTCMYQFNDATEFSATFKATSSLKDALKVTATCSKSTSNEQWSLKLDPINFVWQNTEVKQPESMEKG…
unitig_28	g6908	6112	unitig_28:1456287-1462399	OTHER	CBM13(100-233)+CBM13(251-382)+CBM13(570-697)+CBM13(887-1018)	N	N	1	MKVGYGSENSEGTAFVRRVEVTRRPKAQLAKKVIAAVGVAAFVGCGYVAFQSQTSGSHAALRAGTQAAEAAMILEVDASASTRTMRTLLSGARFQLRVPGKDNLCVDDGGGMTSGQTKVHLWTCVDNHINQVFVYDPRTNQIRSAGKKNLCIDDGGAEYAGHAKFHMFECDPRNINQKFVYEPATMMFRNPTKNNLCMDDGGATYSGQTQFQLWGCDSNNPNQRFALQPIDQPNWRVEHPILLSSEEFMMRVPGKDNLCVDDGGGVASAQTQFHLWTCDPNNLNQVFRYDPDTFTIRSSTKANLCVDDGGGLSAGQTLFHLYECNPSNNNQKFVYDWASQMFRNPTKANMCMDDGGGVSSGQTKFQLWDCDVSNGNQRFEVIRRVVPPPVIKPEYWVPD…
unitig_28	g6909	827	unitig_28:1463131-1463958	OTHER	CBM13(112-245)	N	N	1	MKLGRAADYGSDNPEEAAFLRSSPSLPRPKPKKSKKYVLVAVGASLCLASANVGYHMATGSLSGASSMTPVAVMEDEDAPLPINLVSDQVSPGYGAVPSVLQGGREFVLRIRGKNNLCVDGGGGRNKAETKFLAQPCNPSNVNQMFVYDAVTHQIRSARKPNLCVDDGGANTPSGSNTVLYDCDVDNLNQRFIYDEGTQMFRNPAKSNLCLDDGDGTTAGQSRFVLYTCDNNNPNQHFEVKFRDDWEAERQKVIDAVYSGAKFMMRVSGKDNLCG
unitig_2	g1142	1298	unitig_2:267326-268624	OTHER	GT71(104-331)	N	GT71	2	MITSGLSGYCEIRHKKTGERRRVMEMHCDSLRPDVHFSCDMFQSLLSYGVLSLEYVHDAQFTHENNQLDFRQENSIPDTLVPIGDGGSKNQSVGRLGLSFERAIVMVIYEKLLLSAYVSIRSLRAMGSTLPVEMWFKRSETDVNHPLLKILVADYGVYLREIKEDRVTRFYTKLHAIYYSAFDNILLLDADNFPVRDPIYLFETPEFVGNGAIFWPDYWKPGNTLFNIHRNSFVWDIFGLDYANMFEQESGQVLINRRMHMPALNVLMYYGFSQPRIHEDMRLVWGDKDLFRFAWMKTESSFYMIPRPPGSAGTKHPDYDLFCGLTMVQHDPSGEIIFLHRNTEKIETANDQLLWTHIQQFKPTSKIENYSVRASNVRNYFTHFRGCYGKDENYRNLFT…
unitig_2	g1383	1742	unitig_2:889843-891585	OTHER	CE1(194-508)	N	N	1	MNRLLEKVFPSFSRYREPRSYYSPPEGSKNASVVFRVVYEGSKVIDDGRVVLFFAPKEDPSTRFGAYEGKTPMLAKDVTNIKPGDTIEFDSTEYSLPDVLAFIPHDLSTFTSTLFVQALIHTNMDDPDPNSCLDNALSAFVPVEVSASSATVKIVANQVIKDGMDLSASEWMECVAMKSQLLSEYHNKDVFMYAAVVLPQGYHRRSSHTKYPTVYYIESFMGAEYYADRARDFLASEMGSDWKEGRWPAPMIRVTLGSRFKFGDTSFTDSEVNGPWGTALVSEFIPYLESMFPMLASPSGRFLHGHSSGGWATLWLQLQNPDFFGGTWSTAPDPVDFKHFLTINIYEAVNVFWDPFGRPYPFSRADGAVTSTVRDESSFERVFSRGKGCQWDAFFAIFS…
unitig_2	g1584	656	unitig_2:1288783-1289439	OTHER	GH46(1-201)	N	N	1	MSLVSIPENSKIEWWTNYDYCEDINGDRGFTVSLVGFCSGTSDLLRVVRDVATAKPSHPIAQFVKPLEAVDGTPSHMGLGSLCSTIHSNNDDTWKNAVWNGIRREYWDPAAEWAAKHGLTSALSKGFLFDVALNHGSEVIDELAKKTGKNPKTVGEKAFMMEFMKARAAVITSGDDTTNNGQTDRVDLWKSILQKENMQLKRPLKDLKCYGDTFEITG
unitig_2	g1585	569	unitig_2:1292530-1293099	SP(Sec/SPI)	GH46(43-186)	GH46	N	2	MLWQFLKTTLLVAAVGAHASLGEASSVGDRLPFKSVSGNVTLEQLDTIMSLVSIAENSKVEWWTNYDYCEDIGDGRGYTMSLVGFCSGTSDLLGVVRDVAKAKASHRIAQFVKPLQAVDGTPSHKGLGSLCSTIHSNNDATWKAAVWGGIRREYWDPATNWAAKHGLTSALSKGFLFDVALNHGAEVVD
unitig_2	g1586	1089	unitig_2:1293745-1294834	SP(Sec/SPI)	GH46(37-239)	N	N	1	MWRTWMTTLLLAVAGASAELRVNRFPFDAISGNVTLEQLDTIMSLVSIAENNKAEWWENYDYCEDRENGRGYTVSLVGFCSGTSDLLQIVRYVEKADPDHPLAQFVDALKTVDGTDSTKGLTSLCASVRSSNDKTWQSAVWKGIKREYWEPATRWAYEHGLTSALAKGFLLDVALNHGAEGLDLIAGPLSSVDAMEIGEATYLEDYMNSRANLIAAKGEPASERVAMWQTILTEGNLELERPVADIKFKGDMFTIGGDDENLNGDYEAGKVSTSDENRSGLDTTSETVPKEPVGNALVIKSKNTEAVAESDSDSRLSSASVSSVASTLVVALSVVCSWLHM
unitig_2	g1689	3638	unitig_2:1526239-1529877	OTHER	CE10(527-780)	N	N	1	MELVAREQSIGVTRPLKTHTNVRSVYGSSLSPGICFPQSHNEKATKMSNHTMPEPQRLTDLFTEINASSQTLYAGFLDVKTDQNAANVQLVWGKKDLINYATVKYHSQYHVASLQSKEPVVQRGGVPSGWDVSLTSMSPSKRFVVTFTPDATTDGIFSVFENGELLHAFRAPKSLHGAVYTGDREGGFTWSHDETKIAYVTEKNVTESGVFFENINDKTDDKAVLPTSTKTDWGELYAGQKTAAIFIATVATGKIHEVKGIDSNLPCSDVLFTPNDEDPSRCITTLSTLRTSLQKELSHSCRLRTTDEASNGIATMRSPRFSPDGTKLVFLATPDVITHDTCSQLVVVDWATKKTTTLIDVADEPEPNYTNNPTTAFNGLFIESLFKKCWSTDGQWIFF…
unitig_2	g1698	2387	unitig_2:1546325-1548712	OTHER	CE10(525-780)	N	N	1	MTTTLDDAQLQRLSDLFTEVNASSQTLYAGFLDVDSAQNAANVQLVWGKKDLINNATVKYHSQYHVASVQSDKPVLLRSGVPSGWDVALTSVSPSKRFVVTLKLEKGSDASAPAEGVFSVFENGELLHTFRASKTLHGTVYTGEREGGITWSHDETKIAYVAEKKVAESGVFFENINSKADKTKSDGDEKKADEKTVHLGGKYEYQDDWGEQYVGKKTGGIFIATLATGKIHEIKGIADNLTCADVLFTPNDDGLVFAGTETDNPKRLGIIYCYNRPITLYHYAFNTEDVTQEGVVTQLMLEPSDEASKTIATMRSPRFSPDGTKLVFLATRDVATHNTCSQLVLVDWATKRTTTLIDIVDEPEPNYTNNPTTAFNGLFIGSLSKKCWSSDGQWIFFGT…
unitig_2	g1699	2378	unitig_2:1549427-1551805	OTHER	CE10(516-784)	N	N	1	MSTTAPALSAAKYEELTELLTEIDGDKHYVLEGYLTIHEGDDNASVQLVNAKMDLINGAMTTYHAQWHVSGLASTQPRVMSPVVPSNWTVAITSVSPSKRFTVTFTPDTTTEGIFNVFENGELLHTFRASKTLHGTVYTGEREGGITWSHDETKIAYVAEKNVAESGVFFENINSKADKTKSDDDEKKADEKTVHLGGKYEYQDDWGEQYVGKKTGGIFIATLATGKIHEIKGIADNLTCADVLFTPNDDGLVFAGTETDNPKRLGIIYCYNRPITLYHYAFNTEDVTQEGVVTQLMLEPSDEASKTIATMRSPRFSPDGTKLVFLATRDVATHNTCSQLVLVDWATKRTTTLIDIVDEPEPNYTNNPTTAFNGLFIGSLSKKCWSSDGQWIFFGTQLG…
unitig_2	g1725	2530	unitig_2:1601623-1604153	SP(Sec/SPI)	GH114(116-305)	GH114	N	2	MKIFTVTLVAALFGLSAGCKVGNDSSTDVTTPPQTNVPISAPPQTGEPTSRPPKTTRPPKTTRPPKTRTPKPSASTTATPGTSAPPSSSTPPSSSTPPSTGAPGGSWWKPAPGTTYQIQLTGDLKLDYDVQMYDLDLFDTPAETFAQLKSKGVKVVCYFSAGTYEDWRDDKNKFTKDMYGKNLPEWKGEYWVDTRNEKVREIIKTRMQLAKEKGCDAVDPDNVDGAFNDNGLGLTAATQLDFNRFLADTAHSLGLAVGLKNDLQQVEELSKVFDFAVNEQCAEYDECEVLQPFINLNKAVFGIEYNGDKKKVCAAANKLNQDTLFKSLDLLTDGDWIPPVDTDWSTLPAWLKAKDFDTIVKPRIDDAIAYLKQEAKVETTFSYGYCYGAWVGARLSALE…
unitig_2	g1752	1514	unitig_2:1666332-1667846	SP(Sec/SPI)	AA7(62-292)	AA7	N	2	MKTLLWCLAALAALVPGISATPGHRWLADNKLDLYQSCLGTNRPVTADLFFTPTSSAYLDFATGTNARIDRHPAAVFFAQNEHDVVVALECALLVGLTPVARSGGHSYETLSSIDGGVVIDLASMNNVTVISRNDTAQTGVASVQGGARLGQVYKEIYRQGGYNFNAGTCPGVGIGGHISGGGYGMVSRHYGMAADSTVGLRVALYNGTVVEATATENSDLFWALRGGGSGSFGIVTEFRIQLHKVPQSTMFVIYYDNTVTSQLIRAWMDYFPTADSRITTQVNVDKDGTTFRGQFIGPMWELNELLDASGMLSHGGIKYDVRTDKCTSLGTKAFMWGDNCNNLDVLNTEVHPRSNSKSYSKMKSAYASKKLPDDGIRLVIDQVNKAPASSWIQFEAFG…
unitig_2	g1786	1385	unitig_2:1749075-1750460	SP(Sec/SPI)	GH7(22-460)	GH7	GH7	3	MQLASILAFQSLALASIASAQQIGQSEPEVHPSLASQQCSLSGGCTTESTKIVLDANWRWLHKVGDYKNCYSGNQWDTTLCPDPETCAKNCALEGAKYADTYGITTSSDALRLKFVTKGQYGTNVGSRVYLMQDDQQYKHFKLLNQEFAFDVDVSQLPCGLNGALYFVQMDQDGGKAKHPSNQAGAAYGTGYCDAQCPHDLKFIQGEANVLNWSASASDANSGGGKYGSCCAEMDIWEANKMSTAYTSHPCSVDGLYRCSSPEECGDGALRYKGVCDKDGCDFNPFRMNNKQFYGPGASFALDSTKPFTVVTQFLTDDQTANGKLAEIKRFYKQDGKTIENPAMNWTGADPLASITDKMCKQTKTLFKDEDDHARKGSLEKMGEALKSGVVLTISLWAD…
unitig_2	g1838	2177	unitig_2:1870826-1873003	SP(Sec/SPI)	GH5_33(176-453)	GH5	CBM43	3	MWTRFQVLGALCALALSTVSGAGAPPEVLRALTPPRTVTLNAVAEPVVADKKKDDDKKEDKKDSEKDDKKPVKDLKWYWEHEQDPRFMAATGNFTNFKPNDQEQTCSHDKHSTPFNKQVRGANLGGWLVLEPWITPSLFYQFLSTQERFGDKAPEKTAMDSYSFCTALPKEEANRQLRIHWANWVTEDDIAEMAAAGVNSLRVPVGDWMFTPYEPFIGCTDGAVEELDRVADLALKYDIDLLIDIHGLIGSQNGFDNSGKSAAVKWTSIASTQPVGTTTFEHWPIRQAEWAGTFDQNNHNYSSINYANLNQSLHAVLEIVNRYKDHPAILGLQPVNEPWELTPIQILKDYYWKSYKRVKVLAPHWKFVLHDSFRFGVQYWSQFMKGCPDIALDTHIYQA…
unitig_2	g1949	1872	unitig_2:2201093-2202965	OTHER	GT22(27-445)	N	N	1	MAKLTKRKERTPSPAASRGRRRAMYMSLGMMRVFLAVTSLGMIHPDEFFQSQEVMARHELEDDDPSLHAQLHLPWEYELPTPNRSVFFPALVAGLPYKLLQWWGVRMTGTVLLLTPRLLLCAVSFLIDLALYRCAKALRLKNRFGVVLSFASAWTTLIFMSRPFSNTCETIHLAACMTTLLCFNPHIRFFFGLFHVQTLLLGSLLAFGFFTRFTFPFFFFPLGLELVRRQDAILVDTFRKKSVSSSAPTWRRLCGVVWTGVQGLLAFAVCSIGIIALDTVYFRGEVTSYDIQQLVIAPWNNFIYNLQYENLQLHGVHPRITHAMVNMPMLFGPLYFAFLAHALGSTTNDRIQHLWRGSCVLFPLLCISMAPHQEPRFLLPLLVPLHLFTPNIFKSRWKS…
unitig_34	g8058	2633	unitig_34:285176-287809	SP(Sec/SPI)	AA3_1(16-541)	N	AA3_1	2	MRIPRVGALIGALAVILPAIDAQAYDVVIVGSGPGGLVAAEYLSRDANVSVLILEAGLPSLQATGGTDGPSYASSKGWTQFDIPGEFDNTIYNSANEKYRVDFVTGPYMWLGKLVGGCSSINAALYFRPPDSYVTNTKWPFSPSRVAALLDENEKIHDATDAPSADGKYYLQEAYNIVANAFKKIGYNEKTINDPAARNAKSQTFGHAPYTIKNGLRDTPAKAFWNLMKTRSNVKLVTSAMVSYIRQYQGKATAVVYNTNVEVPLTARGAVIMAAGALGTPKVLIQSGVGPQDQINLLNLRGDFPGVKNGGWVINNNVGKNLFDTNVVFASFSHPDQKSFQYKTKPSWAIDQYMNQGQTGGWASPGPVLIGYENYQVNGRAYEFQTTVLTAGFDTFYSQ…
unitig_34	g8087	2174	unitig_34:368595-370769	SP(Sec/SPI)	AA3_1(21-552)	N	AA3_1	2	MRLPRFLTASSVLLLAVFASQAHAIDTYDVVVVGSGPGGLIAAEYLSRDPLVKVLVLEAGLPSVQASGGTDVPSYAQSKGFTKFDIPGEYDAAASVFDSSNAKYTTDYLDDRKLPLGQLVGGCSTINAALYFRVPDSYISQTQWPFSADHVNQLYDAMENEVYGTTDNPSPDGKAYVQEAYNIVSRALQNHGGYQSKSLNEAEARNNKDRTYGHAPFAIKNGLRDSPAKTCWGKMKSRPNVKLLTSARVSYIKHTHGQATGVVYNDNIEVAVSAHGSVIMAAGALGTPKVLIQSGIGPRDQLSALQALSNRFPGVKQTFGNNGDGWVLNENIGKSLFDTTLVLASFSHPEMRSFQYRNKPQDAINQYMRDQTGPLSTSGPVLIGYENYEVQNRMYEFQI…
unitig_34	g8338	911	unitig_34:974696-975607	SP(Sec/SPI)	GH17(45-296)	N	N	1	MKSFLLTLVAGVASICSVAAQGVCYDPAHVTMVTKDTINSDLVTIRNQGFKAVRTYVVKYGDNNLGSMIIQNGLNASLTIPFNNANPTNSEVHITAAIEAAKTTNGAARVTHIWVGNENLASVNAVPQQMFDYITRIKNSVPKNVLVGTVQRNTEYLDSSRTGISRWGELIAASDIAGINIHPIFTPNTAADKAISVVNAQWGQLYSDATKKLFPTLTSKLAITEVGWPTGGTSNGNTGSKDGALQFMNDYKTWRARHIDAQRSFYFQAFDLPSRTDGPFEPYFGVLNADRSTKFTTYSFMDL
unitig_34	g8339	914	unitig_34:976506-977420	SP(Sec/SPI)	GH17(40-297)	N	N	1	MKSLLLTIVAGVASICSVAAQGVCYDPDHVSPVTTDSINSDLATIRNQGFKAVRTYTVQHGNNNLGKLIVQNGLNASLTIPFDNANPSNSEVHIKAAIEAAHFTNGAARVTHIWVGNENLASVNEVPQPMFDFIGWVRSSVPAGVLVGTVQRSTEYLEPSRAGIYRWNDLIATSDVAGINIHPVFNPNTRADQAIGVVDSQWGRLYSEETRQRFPSLTWKLVITEVGWPTEGYWNGNSGSKEGAMQFMNDYKAWRAHHIDAQRSFYFQAFDLPSRSNDGPFEAYFGVMYADRSPKYNSYTYMDM
unitig_34	g8340	917	unitig_34:977905-978822	SP(Sec/SPI)	GH17(21-298)	N	N	1	MKPLVVLLVCLANFAKVKAHGVCYDPNHNKPADADAIRKDAQRIKEAGFKSVRTYVVKFGPDNLASLLTEQGLNVSVTIPFVNERPDDSMPEMLAAVEAAIKPVTPGAGRVTQIYVGNENLANVNAVPPKMFEFINYVKGAVPPDVLVGTVQRNTEFLEPARVDAIAGWKQLLDGCSIVGVNIHPVFTANTTAERAIDVVNDQWIQLTDEKTKQRFPGIVPKYAITEVGWPSAGSMLGNTGTKEGAQDFVNAYKTWSKKHIAEDRSFYFQMFDQPQRQDGPFEAHFGMVDASGVNKFTSFSFQDL
unitig_34	g8354	1394	unitig_34:1016485-1017879	SP(Sec/SPI)	GH17(34-278)	N	N	1	MKSALYLLAAFAAYSAQVNADGVCYDPDHVGIGSKNANTVRNDLQTIKNAGYSHVRTYISVFGNTDMASIIAQSGLRSALGVPYPAGDTDKQAAAAIRAAQSGSVDYIFVGNENLGNSVPSDMIDLINSIKSQVPGNVKVGTVQTTGTLAGSKGSGWSSLLSACDAIGVNIHPIFTSGTGSSVQKAIKETGAQWDNVKKAIGDKLLLTETGWPTGGQVAGNSGSTDFAASYYQAYKSWSGFLPDSKKFYFQMFDVDSRENAIERSYGIMSSSGSSKYSAGGNPAPTTPPPTTPAPTTPAPTTLPPTTAPPTSIPPTNSTVGHGSSSHDGVIGAGSGSLGDEAGIIKKKKKSTGSSESEVVESAELESGVIESPDYVAPTSDATYTDGANAVGGKKDDVQ…
unitig_34	g8364	3181	unitig_34:1039970-1043151	SP(Sec/SPI)	GT41(420-942)	N	GT41	2	MWRHLLLPLALWLTAAWVSEATEPLQARCHIVSPSNEAFPCYMAAFGEYVPHLEKKYKAVLPVPTAQNEADDLTACSEISKLATRGALVLVRRGGCTFQQKLVNVAAAGGNGMLVINTDDSALQLGTVEFESINAMALSTPRSYGDDLITRLSSADSPEDSVEIHVSSMISSYEQAWSRIKYLTSINAPLVAYDTFIEALPDAISTFDSVLEALVSRKSVYLAGVNDNDLSALLAFVVNCSSAFPDSWDATDDVRFIAATSAASIVTLLENQTQESKNEILLSASMRLLGRGYYAHAARLLSVVKTESSTCQLAFVRFLSGDLVSAVMAGRECRFRHIEINNTVDSLQIPNENFERLVALELSSEGKECLDRLGPYQTSDVNSSGRPARLCCRRRIASH…
unitig_34	g8450	2536	unitig_34:1241302-1243838	OTHER	GT41(18-584)	N	N	1	MRLRGLSVLDVHLELKKLFDSGRMVQLQQAAQEVITHNPDVLQDNRYPSPFQYLGVAQYALGDLAKATETFEEAVRTNENDVMSWVHLGNCYLYLMELTKAATVLEIAVLQKGAVRDVHRLFKARNWMADWQDRDELMAQVELVVADDLLHKRLCVVNPLDFAELPSAQILGLSRQPLIAGGGAVTTANKYNHTNDDWMLHTSELRVGFVSSDLGIHPVSTLIRGMLAMLKGEKTTHRIKVYCFSLTTATSWWKRNITQNVDYMISLTGKDPSEAASIIHSHGIHVLLDLNGHTVHSGLPIFRYSPALVQISFLGYPMTTGVSEIDYVITDAVATPVETSSEFFNEKMLVLPTHYIVNDHLQMLGHTLDGTRPPLSSATRLDPPYHDDVFVFATFSNWQ…
unitig_35	g9540	1238	unitig_35:184671-185909	SP(Sec/SPI)	GT31(150-297)	N	GT31	2	MTVEMPRFRSSRWLSVCVTLLLVASVRGEEAVTAAAHGEQAQQVEGVVETELALDPARTMSKAELCAKDVGMSHPALRLIDVTPEPNPFTLPARYPRIFCFVNTISVHMDRAQAVAETWGQRCDHLMFFSNATDTITVGKGTPRERSYQVVELDVIADHNHLWQKHKASLQYVYEHFRHDYDWFYKADDDAYVILENLRAYLQRPEILMNYKRQPMQMGHRFNLTQELVDYYVVDDALEQSWRKRFHRWVFNSGGPGYVMNRLYMDKIISLIPEKTCLSDYWSEMLPDDAAISYCMMWHDVYPWDTRDLQGRERWHSDKPKGVYYVDPNDPDYWYVDYHHMIGGVRAGDDCCAPDSIAFHYISPPLMFHLERTLYFCREDDERIQDIAAFNDKYQLAIG…
unitig_35	g9559	2248	unitig_35:237334-239582	OTHER	AA3_2(68-615)	N	N	1	MSRPTERTALLADVALSPSASPSASRRSRKPSRLSLLGIAVGTLLLSLVLVVRRREPDVVVSIQDDWEYDAIVVGGGPAGSVVAKLLSDDPWRRVLLIEAGSATQAELGGTERIPSQLNANNLTPFDVPFHWSSVANTQVYHWDYPDVNVAKALGGCGIHNAMLYVRALPSDFHRWDMPKWTWQKALEIYLHMEDFDGPESDYHGKNGTVRTSPPSFIDELSYEFVAASEHVGIPRSPDFNAPNGRFGVGFYHFNTRHGVRESAARRFLGPILEAKRENFKLLLNSTVQKIVLNEAATKAEGVEIERLDGTRQTIRLAKRGQVIVTGGAINTPKILMMSGLGHSGDLKALKIPVKRHLPRVGMNLQDHPVLAMAFSTPMAREIDLHAELTSYFEATQEK…
unitig_35	g9578	911	unitig_35:289198-290109	OTHER	GT1(47-194)	N	N	1	MTMEYMEPWDYPHRHMMLSHHVLGIDPARSVPTNIQVFGPIVHEANIPPHEPEFQAALEKFKAEGTRVVFIAFGTLLTFKKGHDLADELLAGIEKLLGDEKRNLAVIWASLHHHYDKIAPLQAKYPAVQVLFSHAAYGSLSEALLEGKAQLMMPLVFDELLNAHLVEEQGVGLQMDKNTMTADEMATKIDWLLDHSSNPESENSQTLQKLKAICQLSNERAKAIVSNAVTMAATVGVDHLVPPDVKFGFFDRFAVGPIVLVLIVMRWIFQWMSSLVFSNTKVKYD
unitig_35	g9596	5963	unitig_35:328797-334760	SP(Sec/SPI)	GH43_24(1066-1199)	N	GH0	2	MEARGCLVVYAFLLLLCVYEGNAALPTVADAWFQTTRCDELSTADVCVNYERCKRTHRCARGDEDYYIKEARHESFTRQFAGGTRAPIALMNDFEDWKSGTHGWGMQDSDLYANVALGLDTFDFVTIGSLELAAGYVVFNTDKATVWGDVSFKGALTTTKSGTKVAVFNFMTVYLGQGVKVRFVGNQAVSILSRSSMIIDTELRARPGTLGGFPGGGFVGVNTRNNNQNGPGSPSVRVYVKTVSTHGTHVPEIQEIETSAAPGQKIQGHFTVSYGLDGHKTQPIRYDATSYEVQKYLENAFPDIGSLHVERDDTRQQVPEVGRLWRITFLTAVGNVPQLQVQSFLSGLASQVVSRTISEGNELSGTFRLQLRGAQTQELRYDITAPDLRTRLLADFPFL…
unitig_35	g9598	2097	unitig_35:336114-338211	OTHER	GH5_20(207-548)	GH5	GH5_20	3	MPRREDEFMLSPVPDLAQNGGVHATPTYQYSYMHDDGHEDTNTGFIRESAYRNSLMPVRNSETPGRPSSANGDGVFVRGSLLDRDIEALAVSPALSAAEPVKRFKGRIRTWPGLLLLVVLLGTAGFLISYFAMQAHDSSQKRAQEYEAHRFNSTTISGGANDTSVGGDIVSDDGVIGNPKKYPTSACEMPNYLSKNGHIVAAAANGTEVQLKIKGINWFGMETGQAIPFGLWDNSQNGTTVYQIASFLAKNKFNAVRLPLMASWILENKIPNTALINKQENRAIDVTDYMSLLKSIVKALQYRNIGILLSMHTLTYQDNGKLWYNDDVPEEKFLESIDILTKNLCKNEFWNIMGIDLKNEPYKGTWGDGGATDFQAGAQRIANRMLKGCPKWLGFVEGV…
unitig_35	g9599	2037	unitig_35:339444-341481	OTHER	GH5_20(192-533)	GH5	GH5_20	3	MARNDDNYIPSPSLEGSGSMRIVTPSYEFSYMNVDSAERQSASRGRGSEINGRLSASSAHDVFVRGSLLDRDIEAIALKENEMPERSKDYKGRIRRWPGLLIVLILAVGAVFLVVHYAKDAHDTSQERAAKYEAYKFNSTKINDGKDKQVGDDLVSDDGVIGNPKKYPKSTCELPDYQSKNGHIVAVASNGTEVPIKIKGINWFGMETGQALPFGLWDNSQNGTTVYQIASFLARNKFNAVRLPLMATWILENHEPNQWIINKQENRAIDTTNYMTTLKSIVKALQYRNIGILLSMHTLTFKDNGKLWYNADVPEEKFLESIDILTENLCNDDYWNIMGIDLKNEPYQGTWGDGGPKDFHAGAQRIANRMLEGCPKWLGFVEGINAQHTIVIDGEEFGY…
unitig_35	g9610	1945	unitig_35:356984-358929	OTHER	GH5_20(169-510)	GH5	GH5_20	3	MATTYQGEVESPGVTPSYRYSNLAAENIQRQSQSNDVPVDVFVRGSLMDRGIRAVEMADSGKVERSKHFKGRLRRWPGLLLLVLLAGAAVFLVVRYGIMTHESSQDRAAEYEARKFNATKIADGKKDTQKDLTDDGVVGNPAHYPKRACEMPNYLSKNGQIVAVSTNGTEVPLKIKGINWFGMETGQAIPFGLWGNADNGTTAYQIASFLARNKFNAVRLPLMAAWILENKEPNTALLNKGENQAINGTNYMSLLQSIVKALQYRDIGILLSMHTLTYNDNGMLWYNDAVSEENFLEAIDILTKNLCNNDYWNIMGIDLKNEPYKGTWGDGGPTDFHAGAQRIANRMLKGCPKWMGFVEGVNAQHTIVIDGEEFGYYDWYGGGLHGAKKLGMEFDIPNK…
unitig_35	g9611	1966	unitig_35:360265-362231	OTHER	GH5_20(169-510)	GH5	GH5_20	3	MATPYQGEVQSPVATPTYRYSNLAAENIQRQSQSNDVPVDVFVRGSLMDRGIRAVEMADSGKVERSKHFKGRLRRWPGLLLLVLLAGAAVFLVVRYGIMTHESSQDRAAEYEARKFNATKIADGKKDTQKDLTDDGVVGNPAHYPKRACEMPNYLSKNGQIVAVSTNGTEVPLKIKGINWFGMETGQAIPFGLWGNADNGTTAYQIASFLARNKFNAVRLPLMAAWILENKEPNTALLNKGENQAINGTNYMSLLQSIVKALQYRDIGILLSMHTLTYNDNGMLWYNDAVSEENFLEAIDILTKNLCNNDYWNIMGIDLKNEPYKGTWGDGGPTDFHAGAQRIANRMLKGCPKWMGFVEGVNAQHTIVIDGEEFGYYDWYGGGLHGAKKLGMEFDIPNK…
unitig_35	g9655	1343	unitig_35:475215-476558	SP(Sec/SPI)	CE13(84-260)	N	N	1	MMQRVLSVALALSSFSQLTTAYRPGDEVCVVSADNACPLDKLTPSKVDSSTLIYPGGKTRCAFDDFKDPVTGFSTNATYFFQVFPTEKKDKSKLMLYLQGGGACVDDDTCSFGLQCSLQHNATFLMSATASSAGVLNRTDTNNVFKDWNIVNVPYCTGDVHIGNREGGVHEPAAAASLGQPQCLDNNMTVHFNGFENVNAVFKWALENFPDPEHIVLSGSSAGALAAQFYSKMIAKAWKIQEKKIKYTIISDSYVGVAPDSNPIARTVNFFNACGLDYGLPDDVVKKCEANKATVVGTVAPLVKDTLFSDWLFIDSNADITQRVFYQVFQDGLAGFPFNNPLSPEAFYANMTSILDTYEAISSRIATFTVNSSNHMYFDRPTWYSTPGIESNKMGAIVG…
unitig_35	g9701	2060	unitig_35:598292-600352	OTHER	GH30_1(121-498)	GH30	GH30_1	3	MAGGNSNRNTAYGTSSLASDDNLAASTRRRRVLRFGITALTVAAALAVIAYGFSRHGQEATEATTGAGAPVTAKAPEAEVVVPAAVEGAELKVWQSSYLNNETKMMEPISGLKWAKKTDAASVITVDDSKKFQEIFGFGGAFTEASALQFEKLSKEKQEEVLKLYFDKEEGSGYEFGRVPMGSCDFSVSSYSFAEVANDTELTHFDTEVTHDTKILIPFIKRALEKNPKLKLFLAPWSPPAWMKQGDPAHGYEPSMLGSAAPNGLNPDYRAAWALYFSKYITAYKNQGIPFWGLTPQNEPEFAAPWEACLYKASYQADFVGEFLGPVIRRDHPDVKIMIFDHNRASVLHWAQTIYNHPKAKDYVDGMAFHWYDDERYMDGVEFHERLNDTHYVDENRFM…
unitig_35	g9702	1961	unitig_35:600901-602862	OTHER	GH30_1(92-471)	N	GH30_1	2	MSDRTPLLGNGTERNTRSSLLRVGLRLLAAAGVVGVIAYALSRHGGEATENATGSSAGEGAEIQCWQSSYLDGESKMMQPIQGLRWTKKTSKSSAVTVDDSKKYQEIFGFGGAFTEASAVLFQKLPQSKQEEILKLYFDKEEGSAYEFGRVPMGSCDFAVSPYSFDDVANDTELVHFDTTVQRDAQALIPFIKRAMEKNPDLKLILAPWSPPGWMKLADPAHNYEPSMQGSAAPIGLDPEYRGAWALYFSKYITAYKVHGLSFWGLSPQNEPITSVQWESCRYTPSYEAEFVGDFLGPVIKRDHPDVKIMVFDFNRDSVVDWTQTILGHPTAKQYVDGIAVHWYGAEGYLDGIQYFEQLNDTHYVDESRFMLAAEVCNCPDVATGQNAWTRGQRYAHDI…
unitig_35	g9801	1486	unitig_35:888919-890405	OTHER	CE10(102-371)	N	N	1	MVLPLPRLEEGARRRLQRLCLSAVFFLYARKTWRSFRENAAILQLQSEPMTRLGLVLSVLKYTAVGQLLAGAEPLIGLAKPMLGYRIGRNLLSKGEHGLAGIVYGEHSRSSLDLYGMDRNASPRKPVIVFVHGGGWTYGHKWQYGLVGKYLAKHGFLVAVINYRTYPTGSVLEQCQDVQDAIHWMHANAATYGGDPTNLFLSGHSSGAHIGALTLIQSAIREKTGAVDPGNPTSITRPPVYTRVKAFIGLSAPYDIADHYGFESARVVGPFDGVHEISAMKPAMLGLSRFDDFSPPRLIEKAKDLKLSLPPFHILHGNADDVVPPSSSQKLYASMQRAGLRAEYCELDGCSHENILFAVMGDNVPHKDEVVAHYKRIASSASAAAAVHSRL
unitig_35	g9854	2831	unitig_35:1015980-1018811	SP(Sec/SPI)	GH55(24-760)	GH28+GH55	GH55	3	MPPSGSKTLALTMLLLAACVAMCQAAYWLEGINHNGLATYQTSPSTYKVFRNVKDFGAKGDGVTDDTDAINNAISSGNRCALGCDSSTTSPALVYFPAGTYVVSRPIIAYYFSQLVGDPNNKPVLKAAANFAGIAVVDSDPYLAGGANWYGNTNNFYRGVRNFVIDLRATASGTGIHWQVAQATQLQNIVFEMAGTQSQGIFMDNGSGGFMSDLTFNGGRIGAFLGNQQFTSRNLVFNGCDTAVIMNWNWLWTFKSLSINNCQVGVDMRNQGVGSIVILDSSITNTPIGIVVPTNGNTNPRAANTLTIDNLVTNNVPQIVATPTGTTLRAGSTGAVTVAGWAKGRSIDYTTGAAVESTVQGDFTPPQKPAVLLNNGKVFERSRPQYENLAASQFVSARA…
unitig_35	g9904	2300	unitig_35:1144401-1146701	OTHER	GT41(78-675)	N	N	1	MGAVYREKRELDAALECYARALTSLPMHAMLHVDVGRLHYDRQMYADAIASYETALSLDPTLLGEHVAHALALSYHYQQDHATAERFFRQVTKQTTEFHFDLAVTLTKLGKITEACDEYNRALAKDPTFGAAWLNIATLHHQYGDVSDAIPNYLRALALTDDRPELRLMALTNVAIAYEQTRDIHQALGYFHHAQQLLPLVKTKSVADERVSLAVHVARAKRTACIWDAYEDTVAELLQHAVTDYVERGRPNTFMPFDSLMYPMDPLVRLRIARVYSSQISTFPSTHSPASLGLIKSTRPPRLRVAYLSYDFSDHPTLNLMQGVFAHVDRSTTVLLAFGYGRDDGSECRQRMMDHVDEFVNLADSSLEKSVRAIRDRQVHVLMDAQGHTLGSRPQIAAA…
unitig_35	g9916	989	unitig_35:1164199-1165188	SP(Sec/SPI)	CE1(98-231)	N	N	1	MKAFSLLTTLALAALAVTGADAAKCGTKTPAPVPAPATNTTMAPAPAPVATTTKAPAPAASSPAPAAGGEAAAGGAKSAGCGKTATLKSGVQKVTVGGKQREFTLYVPQNYDSSKAYKMIFTFHWRGGSMADAVKNAGGYYGLQALAKESAIFVSPQGNGAGWANPGGEDIKFVEAMISMLDADLCVNQNQRFSTGFSWGAGMSHAVACALPDKFRAVSLIAGGLISGCDGGKQPVAYQLMHGNNDNVLSPQMGKSIMETFVKANGCTSQNAPLPASGSGTHIKTEYKGCKQGYPVIFTGFDGGHVAEPADKGGKNFAPEESWKFFSQF
unitig_386	g11078	1648	unitig_386:108213-109861	SP(Sec/SPI)	GT60(67-380)	N	N	1	MVRLAALLTALLAHGAVVSADSDAPPTLHVANGKGKVELDPTVQHIPLKPELKNLRPPPARVPSTFDIYVGMSVFRDGVRCGKTLLTGFKRATKPDNLYFGIVDQVYDGDATCIEEYCKLASVEWPEHGECRYREHIRLDKRNAHDSRGCAPARHYQQKLLRDEEFCLQIDGHSIFTNNWDENLVADWKQTDNEMAVLTTWLHDIHDFVDEDGNNNVPDFLPHLCATFRGGNGLVRTEDASMISGSTVPQLGTLLGGGFVFSKCHAERRVIVDKHAVWMSDGEEFLRGSHLWTYGYDLYSPSPLGSVVYHNYSRVPVRFETVKIDKEQRELEIEMGINRFHMIVGKDFEGYVDAKEMDKYAYGTVRSFQTYLNFSGVTFEDGKKDQPRYEQLHWVPYEN…
unitig_386	g11079	1619	unitig_386:110107-111726	SP(Sec/SPI)	GT60(70-383)	N	N	1	MRFLLLLALCLSALVLHGVVVRAASGVQSTMGIVNGKGEVRLDPSVQHIPLQPELQQLRPPPARIPAAFDIFVGLSVFRDGYRCAKTIFTGFKRARNPDRLYFGVVDQVNEGDDKCIVEFCKMAAAEWPEYGACRFREHIRIDERTADASRGPTLARHYQQKLLRNEEFCLQLDSHSIFTNNWDENIVADWKQINNEMAVLTTYLHHIHDFVDDDGNNHVPGSLPHLCTTIRGGNGLVRNEGASMISGSKIPQLTALWGAGLSFSKCHAERRVLVDSHTLWMFDGEEFLRSSHLWTYGYDLYSPSPLGSVVYHNYSKAPARFENVKVDQKQKEKETEMGNNRFKLIVGQPFKGPVDALEMDKFAYGTVRSFQTYLNFSGVTFEEGKTDQASCEQLHWVP…
unitig_386	g11083	1630	unitig_386:119572-121202	SP(Sec/SPI)	GT60(69-383)	N	N	1	MRVWSVLAAVLATALVSVDAAKDKEEVATIHVLDAERKEKVDPTVQHIPLNPALAHLRPPPARVPNEFDIFIGLSVFRDGHRCAKTMFTGFTRAKHPDRLYFGVVDQVNSGDQKCIEEFCKMAAAEWPDKGPCHYRDHIRIDERSADDSRGPTLARHYQQKLVKDEEFCLQLDGHSIFTNLWDENLLAEWKRIDNEMAVLTTYLHHLNDFIKDNGDNNPPSGWLPHLCTTTRGGNGLVRNVGASMISGGKFPQMSALWGAGLSFGKCHAERRSLIDSHTLWMFDGEEFLRASSLWTHGYDLYSPSGLGSVVYHNYSKVPARFEHVKVDQNKKKIEVERGINRFHLVVGKPFKGEVDTFELDKFAYGNVRSFQTYLNFSGVTFEEGKNDTDSCRQLHWVP…
unitig_386	g11241	4102	unitig_386:585436-589538	SP(Sec/SPI)	GH1(28-511)	GH1	GH1	3	MRLGFALVAALTSCVVGLQAAADAAEQRCFPDKFLFGTATAAYQVEGGWDELGRTPSIWDDYCREKSGLDCSNVADDFLHRYKSDIQLMSDTGLQSFRFSISWSRVMNWDPETKRMKPNPPGIAFYHSLIDELRRRNIVPILTLYHWDLPTELHNKLKPQGWLNSDIKDHFVEYADLMFHEYGSKVDYWTTFNEPWTFTSKGYGTGEHAPGWTHSKSNAYVAAHNVLLSHGYAVQKFRSLKEKNVIHSDARIGIVLVTDFAYPLNASDPLDVAAAERNMEFTLGWFLTPIVSGDYPEVMRERAGKHLPKFTKEEAAIVKDSYDLFMLNHYASKTVVDCDSPHSNVKCSKLSLGWEGDLGIDGTRLPEGARPSSTDEDGNYLCPWFMAYPQGYLDTIRWM…
unitig_387	g14037	4098	unitig_387:61313-65411	SP(Sec/SPI)	GT62(192-418)	GT62	N	2	MKTVVVVALFAAVACLASGQTTNDNTQALVSSQEALEAIQSAVAPTGVMFTGELEQLEDPTTEDSDLASDGDFGKANTEGLVTNDQQEFFGHHRLRHHHRGRWGGWGSYGPYRFKFGCDGYGGWAYPLGYWNTFGAAALPAPKGDPFVIKGYRETLRSDIRETTETFPQYGTNERGIHYRLDNDAFIKVGAPDMVLIIVVFNNEDSWGETRSVEDFFQLIATFTHPKEQTSVTMLTSSKSEFDKIQRIMREKIPAYAQFSLLLRNDFNPDSSLTRENRHEDGVQNVRRRMLARYRNYAVVSTLESWHQHVVWLDADVYIVPSGLVSKMVHANLDILEPICMIRDGGRDREYDFNAWVGTRTQPKSAEERKGFVPNPLNVDRISTFAQRPEDYIALDSVG…
unitig_387	g14038	2631	unitig_387:66326-68957	SP(Sec/SPI)	GT62(192-418)	GT62	N	2	MKTVVVVALFAAVACLASGQTTNDNTQALVSSQEALEAIQSAVAPTGVMFTGELEQLEDPTTEDSDLASDGDFGKANTEGLVTSDQQEFFGHHRRRHHHRGRWGGWGSYGPYRFKFGCDGYGGWAYPLGYWNTFGAAALPAPKGDPFVIKGYRETLRSDIRETTETFPQYGTNERGIHYRLDNDAFIKVGAPDMVLIIVVFNNEDSWGETRSVEDFFQLIATFTHPKEQTSVTMLTSSKSEFDKIQRIMREKIPAYAQFSLLLRNDFNPDSSLTRENRHEDGVQNVRRRMLARYRNYAVVSTLESWHQHVVWLDADVYIVPSGLVSKMVHANLDILEPICMIRDGGRDREYDFNAWVGTRTQPKSAEERKGFVPNPLNVDRISTFAQRPEDYIALDSVG…
unitig_387	g14039	2630	unitig_387:69872-72502	SP(Sec/SPI)	GT62(192-418)	GT62	N	2	MKTVVVVALFAAVACLASGQTTNDNTQALVSSQEALEAIQSAVAPTGVMFTGELEQLEDPTTEDSDLASDGDFGKANTEGLVTNDQQEFFGHHRRRHHHRGRWGGWGSYGPYRFKFGCDGYGGWAYPLGYWNTFGAAALPAPKGDPFVIKGYRETLRSDIRETTETFPQYGTNERGIHYRLDNDAFIKVGAPDMVLIIVVFNNEDSWGETRSVEDFFQLIATFTHPKEQTSVTMLTSSKSEFDKIQRIMREKIPAYAQFSLLLRNDFNPDSSLTRENRHEDGVQNVRRRMLARYRNYAVVSTLESWHQHVVWLDADVYIVPSGLVSKMVHANLDILEPICMIRDGGRDREYDFNAWVGTRTQPKSAEERKGFVPNPLNVDRISTFAQRPEDYIALDSVG…
unitig_387	g14040	2631	unitig_387:73417-76048	SP(Sec/SPI)	GT62(192-418)	GT62	N	2	MKTVVVVALFAAVACLASGQTTNDNTQALVSSQEALEAIQSAVAPTGVMFTGELEQLEDPTTEDSDLASDGDFGKADTEGLVTNDQQEFFGHHRRRHHHRGRWGGWGSYGPYRFKFGCDGYGGWAYPLGYWNTFGAAALPAPKGDPFVIKGYRETLRSDIRETTETFPQYGTNERGIHYRLDNDAFIKVGAPDMVLIIVVFNNEDSWGETRSVEDFFQLIATFTHPKEQTSVTMLTSSKSEFDKIQRIMREKIPAYAQFSLLLRNDFNPDSSLTRENRHEDGVQNVRRRMLARYRNYAVVSTLESWHQHVVWLDADVYIVPSGLVSKMVHANLDILEPICMIRDGGRDREYDFNAWVGTRTQPKSAEERKGFVPNPLNVDRISTFAQRPEDYIALDSVG…
unitig_387	g14041	2630	unitig_387:76963-79593	SP(Sec/SPI)	GT62(192-418)	GT62	N	2	MKTVVVVALFAAVACLASGQTTNDNTQALVSSQEALEAIQSAVAPTGVMFTGELEQLEDPTTEDSDLASDGDFGKANTEGLVTNDQQEFFGHHRRRHHHRGRWGGWGSYGPYRFKFGCDGYGGWAYPLGYWNTFGAAALPAPKGDPFVIKGYRETLRSDIRETTETFPQYGTNERGIHYRLDNDAFIKVGAPDMVLIIVVFNNEDSWGETRSVEDFFQLIATFTHPKEQTSVTMLTSSKSEFDKIQRIMREKIPAYAQFSLLLRNDFNPDSSLTRENRHEDGVQNVRRRMLARYRNYAVVSTLESWHQHVVWLDADVYIVPSGLVSKMVHANLDILEPICMIRDGGRDREYDFNAWVGTRTQPKSAEERKGFVPNPLNVDRISTFAQRPEDYIALDSVG…
unitig_387	g14042	2630	unitig_387:80508-83138	SP(Sec/SPI)	GT62(192-418)	GT62	N	2	MKTVVVVALFAAVACLASGQTTNDNTQALVSSQEALEAIQSAVAPTGVMFTGELEQLEDPTTEDSDLASDGDFGKADTEGLVTNDQQEFFGHHRRRHHHRGRWGGWGSYGPYRFKFGCDGYGGWAYPLGYWNTFGAAALPAPKGDPFVIKGYRETLRSDIRETTETFPQYGTNERGIHYRLDNDAFIKVGAPDMVLIIVVFNNEDSWGETRSVEDFFQLIATFTHPKEQTSVTMLTSSKSEFDKIQRIMREKIPAYAQFSLLLRNDFNPDSSLTRENRHEDGVQNVRRRMLARYRNYAVVSTLESWHQHVVWLDADVYIVPSGLVSKMVHANLDILEPICMIRDGGRDREYDFNAWVGTRTQPKSAEERKGFVPNPLNVDRISTFAQRPEDYIALDSVG…
unitig_387	g14043	2630	unitig_387:84053-86683	SP(Sec/SPI)	GT62(192-418)	GT62	N	2	MKTVVVVALFAAVACLASGQTTNDNTQALVSSQEALEAIQSAVAPTGVMFTGELEQLEDPTTEDSDLASDGDFGKANTEGLVTNDQQEFFGHHRRRHHHRGRWGGWGSYGPYRFKFGCDGYGGWAYPLGYWNTFGAAALPAPKGDPFVIKGYRETLRSDIRETTETFPQYGTNERGIHYRLDNDAFIKVGAPDMVLIIVVFNNEDSWGETRSVEDFFQLIATFTHPKEQTSVTMLTSSKSEFDKIQRIMREKIPAYAQFSLLLRNDFNPDSSLTRENRHEDGVQNVRRRMLARYRNYAVVSTLESWHQHVVWLDADVYIVPSGLVSKMVHANLDILEPICMIRDGGRDREYDFNAWVGTRTQPKSAEERKGFVPNPLNVDRISTFAQRPEDYIALDSVG…
unitig_387	g14044	2631	unitig_387:87598-90229	SP(Sec/SPI)	GT62(192-418)	GT62	N	2	MKTVVVVALFAAVACLASGQTTNDNTQALVSSQEALEAIQSAVAPTGVMFTGELEQLEDPTTEDSDLASDGDFGKADTEGLVTNDQQEFFGHHRRRHHHRGRWGGWGSYGPYRFKFGCDGYGGWAYPLGYWNTFGAAALPAPKGDPFVIKGYRETLRSDIRETTETFPQYGTNERGIHYRLDNDAFIKVGAPDMVLIIVVFNNEDSWGETRSVEDFFQLIATFTHPKEQTSVTMLTSSKSEFDKIQRIMREKIPAYAQFSLLLRNDFNPDSSLTRENRHEDGVQNVRRRMLARYRNYAVVSTLESWHQHVVWLDADVYIVPSGLVSKMVHANLDILEPICMIRDGGRDREYDFNAWVGTRTQPKSAEERKGFVPNPLNVDRISTFAQRPEDYIALDSVG…
unitig_387	g14045	2631	unitig_387:91144-93775	SP(Sec/SPI)	GT62(192-418)	GT62	N	2	MKTVVVVALFAAVACLASGQTTNDNTQALVSSQEALEAIQSAVAPTGVMFTGELEQLEDPTTEDSDLASDGDFGKADTEGLVTNDQQEFFGHHRRRHHHRGRWGGWGSYGPYRFKFGCDGYGGWAYPLGYWNTFGAAALPAPKGDPFVIKGYRETLRSDIRETTETFPQYGTNERGIHYRLDNDAFIKVGAPDMVLIIVVFNNEDSWGETRSVEDFFQLIATFTHPKEQTSVTMLTSSKSEFDKIQRIMREKIPAYAQFSLLLRNDFNPDSSLTRENRHEDGVQNVRRRMLARYRNYAVVSTLESWHQHVVWLDADVYIVPSGLVSKMVHANLDILEPICMIRDGGRDREYDFNAWVGTRTQPKSAEERKGFVPNPLNVDRISTFAQRPEDYIALDSVG…
unitig_387	g14046	2631	unitig_387:94690-97321	SP(Sec/SPI)	GT62(192-418)	GT62	N	2	MKTVVVVALFAAVACLASGQTTNDNTQALVSSQEALEAIQSAVAPTGVMFTGELEQLEDPTTEDSDLASDGDFGKADTEGLVTNDQQEFFGHHRRRHHHRGRWGGWGSYGPYRFKFGCDGYGGWAYPLGYWNTFGAAALPAPKGDPFVIKGYRETLRSDIRETTETFPQYGTNERGIHYRLDNDAFIKVGAPDMVLIIVVFNNEDSWGETRSVEDFFQLIATFTHPKEQTSVTMLTSSKSEFDKIQRIMREKIPAYAQFSLLLRNDFNPDSSLTRENRHEDGVQNVRRRMLARYRNYAVVSTLESWHQHVVWLDADVYIVPSGLVSKMVHANLDILEPICMIRDGGRDREYDFNAWVGTRTQPKSAEERKGFVPNPLNVDRISTFAQRPEDYIALDSVG…
unitig_387	g14077	7079	unitig_387:156149-163228	OTHER	GT48(852-1609)	GT48	GT48	3	MMRQAASDLRASRRTARSNYLDLEDDLALFEHLESLRTPPATASTTRQDKGVLGIFEVLQRKFGFQSSSVANQKENFACWIANYQLRYPEHERNGQAAYQALWKVHQKFFKNYVKWCKFLGAEPHIGVDGAPMAQLEKQIALFLCLWGEAGNLRFMPECICFLYHSMAMKLPDLEALDDMPEGYYLQRIVRPVYNVVAKMRTAASADPAKPLDHQDVRNYDDVNEFFWRPACLDFDELNIADVLTVKDSKTFREKRSVFNPLLAFYRIWFFLLVVFHTLLVISYVGYYTRDDGADGFAYYANWWDTAQTNLRDQAIFSIFLTVTGLQTLKATLEVWLFDLQTFNDFLFALGSFARLIWHTTFFGLFILVSISPYEQFLFGASTETYLSCGYLLILTYCV…
unitig_387	g14096	6767	unitig_387:215346-222113	OTHER	GT48(837-1562)	GT48	GT48	3	MSAPRRRAQSNYQTLDDQVAERASMSSMGGAPPLSSVSEYKNGVGNGVPAVTRSSAIFELLHAKFGFQEGNVRNQREHFDSWVLNHESRMSTPDSEEAVLQVHAKFFKNYKRWCKFLRTTPYSHENQPHGTAEKQIALFLLVWGEAGNMRFMPECICFLYHSMASKLEGVESLPNVPEGSYLRRVVRPLYLVVAKMKTAAASDKKPDHKDIQNYDDVNEFFWRRSCLDFDEHNVAEAIGLQEQKTFRERRSFLNPFLAFFRVYFFLLVMFHLLIVIAYVAYRSDPDLRTGIHFYENFFSETISDIRTHAFFSIFMTFSGLLALKAVLEIWLGGTLIFARSAYAAALLARLIWHLLFFALFTVVNMSPYEVLVGGSDMLSMAPVITGIYVAPVVIAAIVR…
unitig_387	g14105	2318	unitig_387:252044-254362	SP(Sec/SPI)	GT31(87-287)+GT10(591-735)	N	N	1	MHAWLVWGLVGGLTAAYTLGSHRQTHSTHVSDLNPPLDASEWTIGPALDSRDLLKRPTSNLNSDDQQNHAFLLIGVKTRAVKGFVARQAIRDTWASPAALPSNVRVLFVGCHPDLSEFDPSIHMEIQSSIAQEKAFYGDLLTDELQCRDAYLELVAKTVTFLHYATSHWDFTYVMMADDDIYLRVDRLVELLKENGDHKRYYAGDVSAIRMTWPQSALRDPTHPNYVSEEVYPMRHLPPFASGPHYILSVDCASFITRNRHDLRGVGTLEDVSVGLWMLGMQIHPRHLTQFHQLRSGGCRNALISLADLEPSAIRQIHANLCDNAPFCRHFGFDTWLKLYPEPPPPLLPTEAALWDQLDVTWNVEYYGETRSIEVQLALAHPNLPNILDAKFDPSAAPF…
unitig_387	g14131	2342	unitig_387:308461-310803	SP(Sec/SPI)	GT31(77-278)+GT10(585-754)	N	N	1	MTRRQNTWRWLLLCLCVAASTAASSKSDTGLNQVAVDSSTTARRVVLFNEELQDDGWDRRDILVIGVKTSVIDGVDARRAIRETWANAASLPVGVRVLFAGCEPDLSMYNESKRHSIRKEIRQEKQLYGDLLTDELQCRDSYEHLVEKTVAFFRFASSHWHFAYLMVADDDIYLRVDKLVDLLHQNASTEGFYAGQVWSTHYNRSIHPQRDPSHKNYLSIEEYPSEELPSFANGPFYLLSVDCVHFIVQHQPEFRNVGSLEDVSVALWLQKMNVFPVHIPQFANLKDTLCRNDLVALADATSNAIREIQTNLVNESSFCSGFTVDGWFKRQPDPIEETDARWTDEWNILRLDWSLEFDEYDRSIHLPLRFTHRGGVEPLTLDYVPSGIAYPAFCYLTHD…
unitig_387	g14153	1256	unitig_387:350331-351587	OTHER	GH18(117-292)	N	N	1	MTREMDAYRYSDEDSPRNRRANKACGKRAVTLISALFIVAVIIVVAVVLAKDGDSNDTASDKTQASAATNGTSTDAAGSGSSTGTTTTPPSSSGCPAIAPHERTVAFWQSEVDGCEKIPSGVTHVVFGFALVSNATQQVLPTFQNTDDEIKACVKSLKTKCIVPMGSIGGSTNNAELAATVDADAFATSAVKLIDKFGFQGLDLDDETVGAEFNATRVIARVRALRTALEKKDKSLLLTYDAYFNEGEPSFCKNPEYSAYTRCFPTEIIPSVDWINIMAYNVQSDPTAAAEIYDKALNTTFAEWATQLDGDFTRATIGVCVEKSCAYGPGPSTAIVERWNKFARQAGVGGGMMVYAASGEVADDFAVTRSVLPVSTGTT
unitig_39	g8471	902	unitig_39:23271-24173	OTHER	GT32(84-160)	N	N	1	MTQQRRVSLGLIFVGLLFICVGRVAMVGPHLMALNQPNHTNGLRAQFASMNALQLDRYSREQARIPWLIHQSWKSVDKIPARFEPWMRSWRELNPQWQYIFWTDDDNLAIFEHVYPQYLYIAKALSKIALADMARYALLHHFGGLYADADFECVQPFGGLHEEYELFLSSEPRAHAVLLEGSDSPALCNALMASAPGHPFWVQVLESIKAKFDTESESDPVSLTGPRIVKSTYYGGFGNDTRVAVLLPTYFYPEVTYWNLDKLHASCNSRNDTAVHTCNELELCDSTQNHLNLKNRVLEV
unitig_39	g8472	1043	unitig_39:28096-29139	OTHER	GT32(92-168)	N	N	1	MGVAKNEPMTQQRRVSLGLIFVGLLFICVGRVAMVGPHLMALNQPNHTNGLRAQFASMNALQLDRYSREQARIPWLIHQSWKSVDKIPARFEPWMRSWRELNPQWQYVFWTDDDNLAIFEHVYPQYLYIAKALSKIALADMARYALLHHFGGLYADADFECVQPFGGLHEEYELFLSSEPRAHAVLLEGSDSPALCNALMASAPGHPFWVQVLESIKAKFDTESESDPVSLTGPRIVKSTYYGGFENDTRVAVLPPTYFYPEIAYWNRGNLLEKCKDRNDTAGKEVCAWLEQYPDGEFTEKTHATHHWQCTWCRGAGDETVTLSSIFPTSVYRPSFNQSNNGPKLVV
unitig_39	g8494	1831	unitig_39:70994-72825	OTHER	AA3_2(32-565)	AA3+AA8	AA3_2	3	MLRRATRTFTPQPAFTAVTTRATTRAMSTEIGNEYDYVIVGGGSAGSVLANRLSAHPGNKVLLVEAGPSDINKWDSWKIHMPAALTYNLADDRYNWFYYTEPQKNLNNRRLPWPRGRVLGGSSSLNAMVYIRGHAYDYDDWEKSGANGWSYADCLPYFRKAQNHELGADDYRGGDGPLHVTRGSQKDQELFKTFIDAGVQAGYPFTDDMNGFQQEGFGWMDMTIHKGRRWSAASAYLRPAETRQNLKVITDTMVRKIVFDGRKAIGIETEDNEKKTVSKIYAGKEIILSGGAINSPQLLMLSGVGDADHLKEVGIPLVQHIPAVGQNMEDHLDLYLQYECKKPITLHNATWQYPHNMVQIALEWLYNQTGMGASAHLESGGFIRSTPGKRHPDLQYHFL…
unitig_39	g8643	1831	unitig_39:469877-471708	OTHER	GT58(51-404)	GT58	GT58	3	MAKATTTRSMAPEKRATRIDKDAKTTQQYGPVLAALYDIMWSYRYFPYLAAMLLLTEAVLGYIIIQRVPYTEIDWQAYMQQVSQFKAGERDYVKMYGGTGPLVYPAGFLYVFSVLHSITNGGENIRLAQYIFLGFYLITIGTMLAIYYRTRVLPPWASVFLCLSKRLHSIFMLRLFNDGIAMMLLYIAVYLFARQKWRTGCAIFSFAVSIKMNVLLFAPALFFLLLQSGGILRTLYYLTICATIQIILALPFLRHNWFNYLTKAFELSRVFTYKWTVNWKFLDEEVFVSKSLALGLLCGHMLFLVLFLEKHFNIMGTFRAVLLKPFSFIEPFPMRAEVAVTSMFVINYVGICFSRTLHYQFYVWFFPTLPYLLWKTNMPLIFKIKTFLVIEYAFNTFPA…
unitig_39	g8738	3719	unitig_39:667636-671355	OTHER	GT20(52-541)	N	GT20	2	MDSDAPEERSFQEREADLLRELSSLYTKLNQVREKRAKVEQETSSAASTEDTSDRRRRRRVILVTRSLPFTLTAEDAQSQWRAEFHENLTLDAAMETYMCLHETYDCVWIGSVNGEVEQSEQNTLKEQLHQDRNYYPVFLDPKREKLFYQGFCKTILWPLFHSSPPTTEDQLISQEMDNEADERNVMEKMWQAYVAVNQSFADAVQEVYEEGDLVWIQGYHLSLVPQMVRNLFPNSNIHIGFFMHTPFPSSELYRILNYREEMLTGVLGADLIGFQTYEYARHFQSSVVRLLGLESSHKGVDVDGHFARITICPVGIDPEKFTALARSDGVNDQIRQLRAQFAGKTVMLGMDQLDPTKGLVHKLLAVEELFTLRPELSREVVFVQIVTGGTSALESPLG…
unitig_39	g8747	1862	unitig_39:685990-687852	SP(Sec/SPI)	GT71(173-403)	N	GT71	2	MAGGRGGWREHLVLIVFLVVSSIVAAIVYELTSGGTVRQRVIEDPRLNSIDMQGDKPRVLWKEGEFECLGWKATHSCDPYGLRDPVRDRACHEPLLYGSGYCEVRNQTSGETMRLMLSTCKTWQYWLIKKVPVTCNDARHFTDFSINAVTYKHPPPQDQPPSDALDVKTSYKRGIGMIGYPKVIAGLYAIIRLLRFHGCTLPVEVWIDPSEMEETHSVLKELVRNYNVIVRTVQDPSASKFFAKPYAIYHSYFESVLFLDSDNIPVQDPTYLFDSPEFTTYGAMFWPDFWRPTVNTPFNVQEQSAMWQLMDMPFIDMYEQESGQLLVNRSRSAAALNMLMFYSSHFPRLLTDWHMVYGDKDLFRLAWVNTSTPFYYVPHLVALGGPYDESQNFFCGISM…
unitig_39	g8751	1757	unitig_39:693318-695075	OTHER	GT71(196-425)	N	GT71	2	MFVQRIIVLIYSLFLFVRNRVPHKKWIALVLASLYIALRTTGQAPVVGQPAPQIRINVMNTATKYEGLHGLPSTVTTLWTDETFECIGWKRTHTCRKEEENQDPDDTPEPEKDFFNCSDPIRPEMAGYCIVRNRTSGDLFKLMSSSCDSLATGEYTCDMARNFSDYAVHSLNYEHKPLAPSLALPSFTSSKRKLTNGILMIVYDKVLPSAFATIRMLRLHGCELPVELWYRPDEMSIDNPIIHRLLSDFNVRIRPIFDNRAKGFHVKPYAVYYSNFDNILLLDADNIPTKDPTYLFEEPEFLKTGAIFWPDYWQPSNSLFQLTNTSLLWELTGVDYVDQFEQESGQVLINRLKSKKALDKLMFYSTHQPRLLEELHLIWGDKDLFRLAWLNTTQPFHYI…
unitig_39	g8800	731	unitig_39:796761-797492	SP(Sec/SPI)	GH19(40-241)	N	N	1	MKTSIALLALASLATATNAVKCSVKPAPAPSNSTSVGFSQYFDEAKFKEVFPQALDFYTFKGLIDAAAKFPEFANTGVELDDKRELAAFFAQMGYESDSFKAAETYAKDKFPVTQFCDATKAPCAEGKRYHGRGPIMLSMNFNYYNAGKAIGQDLINNPELVSTDKAITWQAALWYWMSDQGAGAIHDTVAKDFSVSTQIMNGGQECGPDAPAKETEIKRIANYKAMCEKMGIEPVTKLSCNE
unitig_39	g8801	1268	unitig_39:800019-801287	SP(Sec/SPI)	GH71(25-399)	GH71	GH71	3	MKALLALFFLALSTFAASIKAEKLVFAHHVAGVAVSLTPENWRADMQLAKAHLIDGFALNIASGDPNNEVIINNAFNAADAVGFKMFFSFDYASRGAWAAGSVIDYINRFKGRASYYKIDVRPYVSTFEGPGNANDWYSIKGATNCYFVPDWTSIGPDGFRAHLDKVDGAFNWNIWPEGPRNLGTSGDEAWRSVLAGRHYLMGVSPWFYTSLPQWNKNWLWRGDNLWHYRWEDIIRLQPSMVEIVTWNDFGESHYIGPLYPAAFPAGANYCNDMPHQAWLKLLPNYIARYKGIAVPAGNDKIVVWYKRNYGQSCGTGGTTGNNVAYQPFYQPYELQEEKIFVTVLLNSAAQVTVQVGSAAQQVFTANQGGVFHFDAPKNGALGAVVVRVVRNGAEITRA…
unitig_39	g8817	1424	unitig_39:833095-834519	SP(Sec/SPI)	GH17(73-320)	GH17	N	2	MLFADFLLALVIFTTTAACADIQNTTAPGSARRLAGVGNIAVCYSPFHNAEYPLTGGGVDTNKLRAAIKADFQFLSKYVTHVRTYYSMHFDIEIAPIAAKYGLKLYLGVFLTSESWSVQETNAAVNAVVNYPGTVEAVLVGNENLAGNHGATSQILNKVNEIRNRVGSTVTQVKWGTVQRSTEYLDSAYDGDIWTLEKNLDILGVNIYPFFDNSYNGNNPTQLLDDQWNRISSKYTRSKIRLTESGFPTAGAPSSLSPNVWPSLDSSINYYEALVTWQPAGTESLPKFWFQAFDRRPEDPMSAIELERYFGFFTTNRQLKRDGFPHPIGSSPSGWCGVQSSVDYAGNDIGSALSTTAQGCIGICRSVSGCGAYTWTTYGGGTCWLKSARGSSTANTGAT…
unitig_39	g8818	1466	unitig_39:835490-836956	SP(Sec/SPI)	GH17(75-320)	GH17	N	2	MRFAEFLVTLVTISTAVAWVDAQNITSFTPSRRLAGVGNIAVCYSPFHNAEYPLTGGGVDVNKLRAAIEADFQFLSKYVTHVRTYYSMHYGIEVAPIAAKYGLKLYLGVFLTSESWSVDETNAAVNAVVKYPGTVEAVLVGNENLAGNHGATSQILSMVNEIRSRVGSAVNQVKWGTVQRITEYLDSSYDNDIWTLEKNLDILGVNIYPFFNNVYNGNNPTKLLDDQWNAVSSKYTRSKLRLTETGFPTAGAPSSLSPNVWPSLDSSVKYYEALVNWQPSGAESMPKFWFQAFDRHPEDPMSAVECEQYFGFFYTNRQSKRDDFPRQIGSSLPPISPSPVSTSPAPSSWCGVQANVDYSGNDIGSAFSSTAQGCVGICRSFSGCGAYTWTSYGGGTCWL…
unitig_39	g8819	1331	unitig_39:837656-838987	SP(Sec/SPI)	GH17(63-309)	GH17	N	2	MLGRVLRVVAVAASALLVSVNAAVPGNMGTCYSPFHNQVYPLHGEHLASVEPVKKAIEADFELMSKHFTYVRTYYSQYLGIDVAPIAAKYGIKLYMGVFLTNEAWGQNEIDSAVRAVKEHPETVEAIIVGSENMINFQASADSILAKVNEIKGRLGGDAGKVKFGTAQRVTEYLDNKFDGEFQKLAQGLDILGVNIYPFFTNSYNPAKPEELLDQMWNNVAKKYPVEKLRLTETGFPTAGSPSQQAPNVVPSVQNAAGYYDSLLNWAAKGGEGFPKFWFQAFDLRPDDRTMGVDYETHFGFFTTDNKQKKPDFPLQKDQAAPSAAPTQAPTQAPTQAPTQAPTQAPTQAPTQAPTQAPTQAPVTQAPPSTPKVTPAPTPSPSNVGGDADDGKPGVVKPV…
unitig_39	g8840	3722	unitig_39:889750-893472	OTHER	GT71(110-375)+GT71(498-763)	N	GT71	2	MVGLCVVSGALTFSGEFYGQNFDHTKRANHQLHVLRRQATESNSPAIIESDLPANAAEANHQGHSNPSNSTAETPSPPPLSTDRLAATFNASGPLPTRHPDFDDSVSRDRGVIISLHDGILPLGLSLIRDLRCHGSQELIQVYHCFPEELSFQSRILLLTGEPRLEIIDACSSYVDQNLMSKALASNFQNWWLKPLALIHTDLQQVLILDADVIALRDPAVLRETPEYNQTGTLFFYDRVIKCNLYFNANDPRSLNNQLLRGWIESFDYKSFGLSGPAASEHLLSSFAYARKTCHEMDSSMVAIDKTRAGKAIDVLWYLITKERMRISFSWGDKESFWLAYLFAQQPYAFSPWGVSVVSSSPNRDMEQHPETLCGSIAQFLPVEDESPELLYVNGKALL…
unitig_39	g8841	734	unitig_39:893735-894469	OTHER	GT71(127-237)	N	N	1	MRSESFPRRHEYQQPARDRHPKAARSLRVTLVVLVLVTTVVTLTRSITLLEQGDYTPRVIVTSAERVRDLGEETLKPSPKSTPAPTTQAPKLILPPVSRLSYGNAPIHNAAFIKRSSNFDESVSRQRGVVMSIHKGVFALGLCLIGELRCLGNDELIQIYHCFPAELPDNLQQVLLDQDNRLEIVDACSDLVNASVSTESGALNFRNWWLKPLVLHHTDLQEVILLDADDILLQNPALVRLSKG
unitig_39	g8843	1544	unitig_39:895824-897368	OTHER	GT71(122-387)	N	N	1	MPKASRSLWMVLVALALGTTLVTFVRSFSLLQQLKEYAPSKIAAHDQVLAVKTTPKAASTVITSNAEDKGESTVTTAPPTLRLAPAVVIPPASRFAHGDAPIHNAAFIIRGVNFDDSVSRERGIVISIHKGVFALGLSLIRELRCLGNDELIQVYHCLPRDLPGNLQQVLLKQDSHLEIVDVCSDLVQARVITETKAHHFRNWWLKPLVLHHTDVQEVILLDADDILMKDPALTRQSKGCQDTGTLFFYDRVMDGKAYFNNHASKTSNVSLLNHIIATFNYTEFGFDGPKHSDHLLTSFAHKQESCHEQDSSMVAVDKSRSGLALEVLWYLIYHMRFTVEYSFGDKESFWIAYELAQQPYAFSPWGVSVVSSSTSHDIQRHPETLCGSIAQYIPGDETT…
unitig_39	g8844	1718	unitig_39:897756-899474	OTHER	GT71(189-454)	N	N	1	MVASRMSTRVLRWAFVVLTFMALTGMLLRSSLLLEQAKRYVPQGVMPAMLIQPTEPLRDLMDAENKTTPSPTTMAVSQSPSSVQRVPPTPSPSTVQTLTTQPPAQTSSPTATQSPTPPPTTTHATSSPAPSTMTPTTAPTTASTPASTLQIPDPLFPPVRRFSYGDAPIHNPAFINRSANFDQSVSRQRGIVMSIHKGAFALGLSLIRELRCLGNDELIQVYHCFPAELPDKLKQVLLDQDNRLEIIDVCSDLVNAKVMTEFAAVKFRNWWLKPLALHHTDVQEVMLLDADDILMKDPAIMRQSKGYQETGTMFFYDRVMVCSLYLNNRFSKRKFAQHLHHIVDTFDYKAFGLEGPKPSANLLNSFAYQRQSCHEQDSSMVAIDKSRSGVAMEVLWYLI…
unitig_39	g8848	1568	unitig_39:906807-908375	OTHER	GT71(133-401)	N	GT71	2	MMNPARRVAYGLVMFLLVVCSLTSVVIVTLDTGFSSGPNSLPGKSVSHDERPQQLMRVASGGDRGLPSDTERITRSDYSGSDSDEIFDGKLANPDEMPEEVSDRRTDETFKPIPASASSNSQPASQANISYDKGIVLCLHDGIVAMGVSLVRELRCLGNQEVIQVYHCLNELSEASRALLTRKDLRVQIIDVCAEMMGKKLFNEKKAKSFQGYWIKPLALYHTNLTEVLVLDADVIMMRDPAVIRTTSGYQRTGTMFFYDRVVRKRVNFNKLVRVSADTKTARQYLKIWIDRFPYQRFGLTKAQLSPHLRDSLSYREETCHEQDSSIVAIDKTRAGKAFDVLWYIMTEKRFRFMFSWGDKESFWLSWEFSHTNYTFSPWAIAAVEAAHNRDFALHNTTL…
unitig_39	g8850	1388	unitig_39:909987-911375	OTHER	GT71(86-355)	N	GT71	2	MTTATRRTVLYVFTAAICVLAIGFIGSLSGFLSTDMPREWIPTNWAIQDGAKFLRANSLSYDHALPEARGSGSMDMDMDVSIQRESGVIICLHDAIVSMGASLIRELRCLGNQEVIQVYHCLNELSDESKALLTRNDAKVEIIDACSELLPDPNVFNNDEELANSFQNYWIKPLAMYHTRLTDVILLDADVVLLQDPAEMRALSGYNRTGTTFFHDRIRFMRKFFNKQSKEGKQMLREILETFNYQLFGLEGPQNSEYLNQSFAYREETGHEMDSSMVFMDKLRAGKAVQVLKHLILNTRFRYNFSWGDKEAFWLAYELAHQDYFFSPWGLSLVDSVPNADMHEHPESLCGSMAHFIPTENEQDPPELLYVNGKALLEPYPGGVDKALESGRSRMFNVF…
unitig_39	g8853	1461	unitig_39:914242-915703	OTHER	GT71(79-351)	N	GT71	2	MLPATTRPKDTSRRRRRQWLLLPGAVIVLVSLYQIYLLSHLSFTAQFASGSPSQPPIRLPEPPINKRRDVPTYDVDPTRGIIMALHDRIVPMGVSLIRELRCLGNREIIQVYHCFPEELSEESRRLLTRDDNHVDIIDVCSDMMERNMMLLEGTMRTFQSYWVKPLAVVHTNLTEVVLVDADVILVQDPAVVRTLAGYNRTGTTFFYDRVSPLNKFFNRIVTRRSGVKLQLLHHMIEKFEYDRFDISGMEPSDYLLQSRAYKGDSCHEQDSSMVAIDKSRAGKAVEVLRHIIFNTRFQYRFSWGDKEAFWLAYEFAHQPYFFTPWGLALVNSVPNDDLGAHPQTMCGSMAHYIPSSEGDADYETPQILYVNGKALLDPFPADSVDKTLRTKHKSRLFNA…
unitig_39	g8914	3443	unitig_39:1138428-1141871	SP(Sec/SPI)	GH47(235-660)	GH47	GH47	3	MHMCLLLLLAVCFVVVRPVSAEIETIVDADGHTAHFNGIRVLSGSSFRSFTNRFKRQLRGVECLTFHEAGNWWHYEWCVGRHVQQLHRFAADELSAAKTPANDWRIVLGRFARDTSKTLRILPLKNFSRLRNPEQQGYYAVQSYAQGEQCTASEDQSKSTTVLNRSVSIQYKCCIFRANETYIEAIDEPSTCQYVLSVCTPVACGFVQKDQYVLNAPAYVGEEERLGLVQTVKDMFYHAYHGYLKHAYPLDALLPISCRGETFELGKIQMLTLIDTLDTLAILEDAKEFQHAVHLVVSRSNFDLNTEVSVFETTIRVLGGLLSAHLFAIDEKLGLFPPGEYKNELLTLAVDLGDRLMPAFDTPTGIPYGTVNLRHGVPKGETTVASTAGAGSLSMEFTM…
unitig_3	g2044	1100	unitig_3:13615-14715	OTHER	GT32(70-144)	N	N	1	MSSSTREWRWRVWHDEDCAWLSALEARNKRLVARVSSAASEPNRPSERAIPQIIHQIWLGPHKIPPRCVNWMNSWTQLHPDWEYRVWRDADVTRLSLKNQSAFDAATNFGAKSDILRYEILEMVGGVYVDVDTQCVRPVDTLVKHFAFVVGISNTGCVEINNGFIAATPHHPILTHLIDSIQQDFKRPRLNTATLSLIAQMCGPGIGLPGQLLPPDSQSNPMETIERTGPGLLTRVFMQAIGWSTTERGFLSDDEQEDVVALPETYLYPLPNTLSTISSDELSVQLPSTAFTVHYWERSWLPSPS
unitig_3	g2106	1985	unitig_3:157543-159528	OTHER	GT57(43-514)	GT57	GT57	3	MIKQDMMSRGESADASLLLRVLQHFEQHGLKREGVVLLWLFLVLVRWLVGLHSYSGANTPPMFGDYEAQRHWMEITLNLPVSEWYFNSTVNDLLYWGLDYPPLTAYVSYLFGFGAAVVEPGMVELTSSRGYETATGKVFMRVSVLLCDLLLFFPVVYALAQAILRGQQWSRRMAFVLLVLVQPSLLLIDHGHFQYNNVCLGFTALALVFLWNDHEFLGSVAFCLALNFKQMALYYAPAFGVYLFAKCIYRPQFVVHLVKLAVAVIATFAVMWLPFCLYAREGETCASSVGQVLHRVFPFARGLFEDKVANVWCVLDLVLKLKRHVSPVLQMRLCTITTFVGFLPSVVDLVRRKPSKFRFLLALVNSSLAFFLFSFQVHEKTILLPLLPTSLLWNHNALL…
unitig_3	g2125	2177	unitig_3:208638-210815	SP(Sec/SPI)	GH81(57-719)	GH81	GH81	3	MKLWLLSAVGLHAWLAATSEAQDTWESGDLTPPQTLVPYSTGQLSLCTPRNIDIVAGKPIPTNTWWGNLITCDPSSNVTQPIWPNPFAISVETVNTQSLHGFAMGYPFRYRYFGNLSPSGEAPFYGHVAHKEVILSATEFAGTVPIVRVTDWSDLGVSVALSIASGKLESNIVSGMAFVTGTYTQLSPRIGIQVPMQSINGLSITVGRVVTGRKFLITTVSNLQWVIYTNTDVSLTIETNQVLRTSSPFTGTMRVAPVVTEVPVTVYDMYKDCIVLGGDVAVVSDAQYQFQWRTMGDCTNGLFHYALPHQMETIDASTVREVTGVSLRSTVRGQMRALVTRTTAMTWLFNEPASIPITFYPRYRLTTQDASQQNLLNQLVTDIQSTWSIATTGSFYFNG…
unitig_3	g2133	2393	unitig_3:227127-229520	SP(Sec/SPI)	GH81(116-791)	GH81	GH81	3	MKSSVTSIVVSCVALFASSEFQAALAQQQLTVVGDNNITMTVHDNSSSSSTVLIVGDAPVQATAPPNPTRIDSPSDVPSDVPSISNNTGSVDLSAGAVPPPASLMDHTDAMRNFAPPKYIDTSAIKNRAIPTNNWWGNMIAYDKSTAIQPVWSNPYALQVVADKAPYGLAVSYPYRSRVSGGNSGNENAIRYYAHGIVREFMFSAAEFSAKPTFQVVDWADIGVKVQLKSGSGTMESNLVSGMSYVSARYSGGLSPKLVSVASIQSVNGQSPGTITGSKFEIVYNSGQKWVVYSLSSDGETEKPITLTVEGGSTLKSTGAFDGLLRVALAVDSAWVPILDKHKSCVVEGASVAIDSDTSYAFNWKTSGNCASGLLHYAMKHQALTIDTSSASAVDGMIA…
unitig_3	g2161	3248	unitig_3:317583-320831	SP(Sec/SPI)	GT41(254-871)	N	N	1	MRMGAMHAIILLLLACCTSCAMGFSFPYFSESVVEILFPPNNLLAEHSFLEIQIAMRPELLDPQADDTRVCVGMATVYAPPDLDLEAGKSGLHERCYEQFGNYTTFQLSGLVPGVRYAITIGLMNGGRFVAHSMRTLEVASIVARRQGRDTTVHRMGVGEAIGIAMDSMAHGDRKFAREIYKRVLDMFPNHVEALHGMGAVYYHEGDLVKALEYVQRAFKGNESDPRIHLTMGLCLRGLGRVEEALRVLQTAVSLKPDYFDAWGALGDTYRTEQQWDDSLAAYRAVTSRLDEAKTSGMVAEQSYERLCELLRFTEGWYDAEQCLSTALSHWPENSNLHELRGHLMLQAGQFEVALQEYEASARLESINGKIAVAEVLEALGEYRASIRQYDQIIERLQE…
unitig_3	g2184	1093	unitig_3:360158-361251	SP(Sec/SPI)	GH43_6(32-317)	GH43	GH43_6	3	MKLLSIAATLLGLSASVEAYANPRACSGVCGNAHDPAIMRRADGTYFRFSTNGKVAVHTAPSINGPWTYKGAAIPAGSIINMPGRDGLWAPDVQKVGDTYYLYYSVSTFGSQTSALGVASSKTMDVGTWTDHGSIGVKSDSSKPYNAIDANLLVDGNNHYMTFGSFWKDIYQVKMAGPKKITGSAVQVTYDPKFDSIEGAYVFKHGSYYYLFYSQGQCCALDTKRPAAGKEYKIKVCRSAKPTGGFVDKNGVSCTNGGGTIVLESHDYVYAPGGQGVYQDPIEGPIIYYHYVDTRRGYADGDKLFGWNKLSFSSGWPVVT
unitig_3	g2186	1166	unitig_3:363233-364399	SP(Sec/SPI)	PL1_4(114-305)	PL1	PL1_4	3	MKIFRAVVIAIVSFTASVQAAVPGAAAGTTGGGNATPVYPTTIAQLKTYLSDSQARVIVLNKNFDFRGSEGTTTERACRPKFALDCIAKNNGYKSQDMLLSVSTSCDGQYVDGIKYDNAGAKGGLVVGSNKTLRGEGRSGVIIGKGLSFQGTNVIVQNIHITELNPHVVWGGDALGFPGLGDTPASKVWIDHVKVSRVGRQMVVTNFAGVNGLTITNSDFDGRTTYSASCDGHHYWGFLLYGKNTRISMYNNVILAMSGRSPKFGGSSDSNVVAHVANNFIWDNTGHSFDVGINSAVIVEGNYFKGITKPITAPIEGSLLMSTANNIGSCAAVLGRNCVANVLETSGTLTSNKDSDALSKVKTLATTFKPATAKGLTYSAKNWGVGDL
unitig_3	g2238	1439	unitig_3:526805-528244	SP(Sec/SPI)	GH43_26(36-317)	N	N	1	MVFGRRTLAVSVLTVLASTLASNHVVESLAGPLASNPDPFVTYHDGWYYLTGTAGSRIPLKRAKTLQDLKTTPSETIFTNTSEPGLPNEAYWAPELHRLEDKWYIYFSARYTGKNERMFVLENANNNPLEGKWTYKGLIDPTNDRYSLDGTILQLRNQTYLVYSGIGNGPKQNLYVTKLKNPWTVEGNRTFIKGPEYDFEMRDSTVTEGPAILKKNGKVFLTYSGSACNTNHYSMGLMWMNESDDPMKIESWHKIDHPVFQEDAKAHAFGPGHNNFFKSPDGKEDWFAYHATTTNKDGCSNRVTFTKRVDWDANGFPVFGTPSEPGKRYGVPSGEPAVYSNSTLANGIYLIQAASDGRVVQAKDCSYNPNTPTVFVANTKDICQQWKVQAATDGAYAFA…
unitig_3	g2252	878	unitig_3:580367-581245	SP(Sec/SPI)	CE1(47-197)	N	N	1	MVAKSSLFCGLLFALSGLFGSQVDAVKSPGCAKPASIASGKYSVTVNGKSREYLVRVPEGYMHQSPNRVVVAYHWYGGTIDDLVIGANKYGNGSYYGLLPFGGNSTIFVAPAGIDTLWMNTDNEDLNFVDTIVNSVDNGLCVDTEHRYAVGFSFGGSMAHATANTRGRTFRAVAILSGNDFTPFTGETVPVAVYVQHGVSDPGVNNPITQGRAMRDHFIQVNGCEPKTASEPVAGSGTHVKTEYKNCKNGHPVTYIAFDGVHQYSPMDAGSKTSWVPGEIWTFFTTAPPPFK
unitig_3	g2254	860	unitig_3:584267-585127	SP(Sec/SPI)	CE1(47-223)	N	N	1	MVAKSSLFSGFLIALASLCGTLAAPSTSPGCTQPAKIVSGTFSVTVNGTERQYIVRVPEGYNHEKPSRVVVGFHWYGGSMQDVELDSTKYGNGSYFGLKALGGDSTIFVAPQGIANGWMNTNGDDLAFLDTIVETIDNGLCVDTNQRFAVGFSFGGSMAYAVANSRGKTFRAVAILSGTIFTPWTDETVPISLYVQHGVSDPANPITQGRTMRDHFVEVNGCANQTVEEPVVGSASHIKTEFKDCLSGKVVTFVAFDGVHQYSPLDADSQTPWSPEEIWNFFLNAP
unitig_3	g2255	881	unitig_3:585751-586632	SP(Sec/SPI)	CE1(51-201)	N	N	1	MLLKSSLIFGLLAVLTGLLVTQASASTRSAGCSKPASITSGTYNVTIDGIPRQYTVRVPEGYRHTKANKVVLSLHWFGGTVQDLITGANKYGNGSYYGLVPYGGDSTIFVAPQGIDNGWMNANGDDLSLIDRIIEAVDNGLCVDTTKRYAVGFSFGGSMAYAIANTRGKTFRAVAILSGNDFTPFAGATVPVSVYVQHGVSDPGVNNPITQGRSMRDHFLQVNGCESKTAKEPAAGSGTHIKTEYKMCSSGKVVTYVAFDGVHQYSPMDAGSATSWVPSEIWKFFTSSPRLCE
unitig_3	g2257	893	unitig_3:589777-590670	SP(Sec/SPI)	CE1(52-186)	N	N	1	MPSKTSLLGGLLVAITSLLATQVHATFLKDFSEGCFRPATIKSGKYNVTVNGTVRQYSVRVPDNYNPFNPYRVVLALHWFGGTIDDLEKNSTKYGNGTYYGLQTIAGDTAIFVAPQGIETLWMNTNGEDLALVDELIKIVDKGLCVDQSRRLAVGFSFGGSMAHAIANTRARVFRAVAILSGNDFTPFTGESLPVSVYVQHGVRDPGVNNPITQGRAMRDRFVKLNGCIPKDVEEPQPGSMSHIKTEYNLCFFGHQVTYIAFDGIHEFSPVDSGKTSSWAPLEIWKFFLTAPRPTIW
unitig_3	g2258	893	unitig_3:591555-592448	SP(Sec/SPI)	CE1(51-186)	N	N	1	MPSKTSLLGGLLVAITSFLAAQVNAAFITDYSPGCFRPATVKSGKFNMTINGTERQYVVRVPDNYNPFNPYRVVVALHWFGGTIDDLEKNSTKYGNGTYYGLKKIAGDTAIFVAPQGINSLWMNTNGEDLAFVDALVKLLDDGLCVDQSRRLAVGFSFGASMANAIANTRAKTFRAVAVMSGNQVTPFTGKSLPVSVYVQHGVRDPGIDNPITQGRAIRDRFVKLNGCIPKDVKEPQPGSKTHIRTDYNFCFFGHQVTYVAFDGVHEYSPVDAGKTSSWVPEEIWKFFLTAPRPTIW
unitig_3	g2266	1860	unitig_3:608936-610796	OTHER	AA3(28-575)	AA3+AA8	AA3_2	3	MLRRVAQRVSTGATPRSIARHARHRAFSATQESGREYDYVIIGGGSAGCVLANRLSEEPGNKVLLVEAGPNDANQWDSWKFDMPGALTFNLTNDKYNWAYQTEPQKHLNGRRIPLPRGRVLGGSSAINAMLYMRGHAYDYDDWEANGAAGWSYADCLPYFRKSESYEGGLDDYRGSDGPLRVSRGSQNDQVLFKTFIEAAVQAGYPFTNDMNGYQQEGFGWMDLTIHKGTRWSASKAYLRSAVVRPNLTVVTDTMVHKILFNGRKAVGIETEHKKMKTMSNYYAGKEIILSGGAVNSPHLLMLSGIGDANHLKEVGIPLTQHLPAVGQNLKDHLNIYIQYECTKPITLYSMASPKHPLNPLKAAYDWVMHGTGKGASPQFEAGGFIRSTPDKSHPDIQY…
unitig_3	g2319	1480	unitig_3:740303-741783	OTHER	GH47(37-452)	GH47	N	2	MWTNPGIRDAAFVWRRITLTDDLTSSIERHEAVKRAMQFVWKNYREQAFGADELRPLDGLASNRWGHSGCMILDSLDTLYIMDMKEDFDQGRRFVADELSFDHMGEISVFETIIRNLGGLLSAYDLSKDSIFLDRAVELAQRLLPAISQSDGRADYLLNTATNRSSQPGQLSESGTYQLEFEYLSAATGDATYATYARNFYESIASQQSVQLDGLFANQIAVRDPIELTISMGSEGDSFYEYLLKVWIFTGQQPDDLTKKLYNGATDGMEKHLLRESTKGQLYLADYDMINQHPIHHMEHLACFVPGLLALGAHRMQATDPERSMRHLSTAKRLMKTCYEEFYAKQPTGLAPECLDTPDLVVCSDQHYELRPEVVESLYVLHQVTGDQIYQDWGWNIFS…
unitig_3	g2320	1625	unitig_3:742015-743640	OTHER	GH47(85-537)	GH47	N	2	MLPVARGDGARRSDAGCFVMPWSSSASWRASHMQVLLLMAVSLVGTVSLTSWLWSSMDTTAFTWRGLNFIRVPVAQRRQAVLDAMQFVWTNYRERAFGSDEIAPLTGTGRNMWGGTGCMIIDSLDTLYIMDMMEEFNEGREFVATSVSFEHMGEISVFETIIRNVGGLLSAYDLSKDQLFLTKAVELAQRLLPAIHESTGRADYFLDTTTNRSYQAGQLAESGTYQLEFEYLSAVTGDPTYATYARNFYSHLADQKMLQLDGLFANQIDITETMRSPGSLTISMGARGDSFYEYLLKIWILKGQQPDGYTKKLYFDAVDGMEELLLHESVDGQLYIAEYDILQSRPKHHMHHLACFVPGMLALGAHRIRSSDPDRSRRHMLLAKRLMKTCYEEFYAKQP…
unitig_3	g2491	1553	unitig_3:1153010-1154563	OTHER	GT8(58-254)	N	GT8	2	MAETEAAEVAQQVADASPTSTEEASTSVVPQVVQFTANRPARSRFAYVTVHYEGTSRDPEYVLGVQVLMQSIKLTRTPHDLVVLASDSVSEASKRIFESIGCRVIDVTNIDNPFIGGTLTNKNFIYTLNKLHVWNLLEYERVVYLDADNVLIRNSDELFLCGHFCAVFMNPCHFHTGLLVVSPDAKEYQRLLGGLGHVESHDGADQGFLSSMYSQALRRAELFVPEKAKQLTKLPKGMRLSVGYNINHKYFYEQYHWKLFYLRHFASMTSPISPVKVVVESARSIPALTVGFPMAPVLKPWYWWAAFFLDLHAIWHDIRGTLPSGQESYGFEEAVKTFASFALGIGLLTIILYVLRTFLPMRQLQQKCNELHLRNDAWAKRGFLVLRIVIVLIAARFAP…
unitig_3	g2508	3524	unitig_3:1215542-1219066	OTHER	GT41(165-739)	N	N	1	MDATSWVEVVSDAYDAALGHRQRGEYWQAREYFEVILQMKANVSSDGYERERIERLQTWTHYHFADLLLRNPQDSGQYDMRKAREHYQAALDGDKELHVFGLVEIFHCYNSMGTLSIDLGEFVKAERYLRTVIDVDPTAVEPLGNLAMLFNHQGRLDEALYFNTKAINLRPRDFRLLHNMGVTYELLNQEDRAREYWERALSIKPDSVETLISLSHLFGERGDTERAKSLIARAEAIVIESSTLDRAKLYSIQIRAAMLHLKMIYASVEDLKRSRAQYEQSLQAIALETLPVLPPDPLISVGSGCFGYNAIYQGYNDLAVRARLADIYRRSLPKLSFVANHVTQWRNYQHVFLDRDSNHSKGTNIVYHRRRIRVGFHSAFMRHHSVGLLMSRVIERLDR…
unitig_3	g2611	1762	unitig_3:1457213-1458975	OTHER	CE1(197-507)	N	N	1	MNRLLEKVFVSFSSQTRPDSYYSYPEGSKEASVVFQVVYQGTKVIDDGRVVLYFAPTADPSARYGAFEGKTPMLAKDVTNVKPGDMIEFDSTEYSVPEALALIPRDLSAFTSTLFVQALFNTTLDDPLPNLYTGNVVSEMVPVKIEPTPGALPIVKIVADQVISYTMDVSNSEWMECIEMKSQLLSEYHNKDVFMYAAVVLPKGYHQRPSNTKYPTVYYIEGFMGTEFYADRARAFLNSEMGDDWKEGRWPTPMIRVTLGSRFKFGHTSFSDTEVNGPWGSALVSEFIPYLESKFAMLASGSGRFLHGHSSGGWATLWLQLHNPDFFGGTWSTSPDPVDFTKFQLINIYEADNAFWDPYGRPYPFSRADGAVESTVRDGNLYERVAARGNGGQWDTFFA…
unitig_3	g2612	1759	unitig_3:1459440-1461199	OTHER	CE1(198-514)	N	N	1	MNRLLEKVFPSSFKRHARAKTYYSSPEGSKNASVVFKVSYRGTQVIQDGRVVLFFAPTDDPDARFDAYAGKTPMFAKDVANVNPGDVIEFDSAEYTLPDALGFVPSDLSAFSSTLFVQALVIANLEDPDPNTCLGNYLSAVVPVLADQVTGNSRVVSIAASQAIEEEMDVTGSEWMECVELKSELLSEYHNKDVFMYAAVVLPKGYHQRSKETKFPTVYYIEGFTGTEEYADRARAFLNSEMGDDWKEGRWPTPMIRVTLGSRFKFGHTSFSDTEVNGPWGSALVSEFIPYLESKFAMLASGSGRFLHGHSSGGWATLWLQLHNPDFFGGTWSTAPDPVDFNHFQLINIYEAKNMYWDPHGQPYPTSRTDGAIDCSIRDENYAERVYSRGNGGQWDAFF…
unitig_3	g2786	2360	unitig_3:1895649-1898009	SP(Sec/SPI)	GH3(76-323)	GH3	GH3	3	MRVASVAFALCGAFTASWRLPIVAADIPRACTGEHVQFPFCNTSLGLQDRVEDLLKRIPLEEKALLLTARASPKGNISSIGLPEYNWGANCVHGVQSTCGSRCATSFPNPVNLGAIFDPDAVYDMARVIGWELRALWLEGARENYEHGPHLGLDCWSPNININRDPRWGRNMETPSEDPLVNALYGVAYTRGLQEGPDERYLQAVVTLKHWIAYSYEHYAGVDRMEFDAIVSKYDFADTYFPAFRASVVQGNAKGIMCSYNSLNGVPTCSNDQLTGILREHLGFDGYITSDSGAIEAIFNRHHYTKTMCDAGLRAIKSGTDVNSGSVYSKCLLELIKKKQLDESVVDDALRRTLRLRFQLGLFDPIENQPYWHVPPTEVNKPEHQALSLKLTRQSLVLL…
unitig_3	g2796	629	unitig_3:1935196-1935825	OTHER	GH5_20(1-157)	GH5	N	2	MLDNCANWLAFVEGISENRVWTSWSTGRTYYFMDWWGCGLSKAKQYPVSLKFGDKVVYAPHYYPPNVYPSEYFFGEGFSELPDYQLKANVQGTFDLMFGYLTQDPSSPALVLGEFGGLYTNDLNPGRTIQRAVNYTVELLMRPGFVGGYMWSLNPESGYDYNRRNVQGTFKEGLLQNDWRTANEPYLAALSPTDKMADLKRLPCFKRAP
unitig_412	g10001	1291	unitig_412:147572-148863	SP(Sec/SPI)	CE13(86-260)	N	N	1	MVPRPNVLSGILAVVLAITLHYLYEVYEASLQSGQDCSYASGDACPVDSLKISDTDGSALIYPGGETRCAFDDFTDPKTGFSTNSTYFFQVFPKPERKKLLIMFQGGGGCFDDTACNFAMQCSLGTSTFTTVATASNTGVFNSSDPENVFKDWNIVHIPYCTGDMHSGSKVVDGVDTGHEGVFNHAQCLNQNMPLHLNGFENSKAALAWAKTNYPEVDELVVSGMSAGSMAAQTWAIYIADLWNVPSSETRYGILADSCMGVLPAEYPVGKMFDYVGMCDLDLKLPPSVVDACKAGTLTMNEIVSASLKALPESRWAFLNSKSDGDQRFFYQFIKDGILGFPFPDILPEADFHETVLRFMDTYKEASSYISSFLVEGSQHIFLTELSYSDTVSVAGQSL…
unitig_412	g10002	3706	unitig_412:149140-152846	OTHER	CE13(175-321)	N	N	1	MTTTPVESTVKVCIRACRPEDYKTVAELFLAGMRSYITPEVEHLVGRFEESLAESVNGDLASIQETYFDKGGFFWVATVEEDEKEVIVGIVGLDRKADNEGLLVTILAATFLSATQSYRSGDQVCSYTDDNACPIESLKGSNADGSVLIYPGGNTRCAFDDYKDPKTGFSTNSTYFSQVFPKPERKKLLMFQGGGGCIDISTCNFAIQCSLGTSQTFTTVATASSAGIFNSSDPENVFKDWDIVHIPYCTGDLHFGSKALEGVDTGFEGIFNQTQCLNQNKTMHLNGFENSKAALAWAKANYPEVDDLVVGGMSAGSLAAQTFAYMGVLPVEHTAGKIFHFSGMCDTDLKLPQSTVDACKAETLTMDELVKASLKVLPKSYWASLNSKSDAIQRYFYQV…
unitig_412	g10114	1718	unitig_412:413798-415516	OTHER	GT57(35-548)	GT57	GT57	3	MPPRHATSPASAPLASRTKDTGLDASIVALFVGSVMLKMLLIPSYTSTDFEVHRNWLALTNSLPQKQWYHEVTSEWTLDYPPFFAYFEYALSFVAKWVDPELVQISATPLFSLRILLFQRFSVILSDTVLFYAIYTYCSSWPSVTTTELAFTPSKRRVIMLLTTLDAGLLYVDHIHFQYNGMLLGLLILSAAQFRQQKDLQGALLYAVLLMFKHIYLYAAPLYFVYLLGHHCYKPNASTADEEQRRKRSISETDVHPTIQSQHEGKASFSFFNFLRLGVMVLAVFAVAFASVLFGHPDPIAGLKQIFSRLFPVQRGLCHAYWAPNIWALYAFVDKALVLIGVKGRAGVALMSGGLVQEASFAILPNVSPLVCAALTFLSMSPVLYTIWRYPDSSLFMSA…
unitig_412	g10267	727	unitig_412:887124-887851	OTHER	AA6(33-151)	N	N	1	MSSVQPIQLAKAPKLSAVVQSATLTNASSTRVLIVYPSGTHLNQLAGAVTEGALGVIGDASLVRSRLVEDASFTDDVLWADAIILGSHVMNANVEPKMAAFLATWDFSQDLSHKVGAAFVAGGGMSAGEELTMVNLLHSLLIFRMVIVGGERWTSAFGASAVVSEGPFQPLAQVNPNHQTFPSVCYPTDPDQLLAMFRDKAVGLGRRVATLATVMRNPYP
unitig_412	g10295	1893	unitig_412:1048242-1050135	OTHER	GT30(38-224)	GT30	N	2	MMALEHVYRGLWHATWPFIQWYVKRKDWRRHVPLTATAERFGFSKRPAAWVSQHGAFVLWIHGASVGECLSALPIVDMALSWASAPTQVVMTTTTAAARQLLQQRLAQHPLQDRVTCVFAPLDCPQCVERFYDEWRPAAGLWIESELWPTLILEAGRRKIRIGVVNGRISPQSVRLWRLPGLKSFTQHFMAQFSLVLCQDVANQTRFQSLGARQPQVATNLKFVLPFKTGDTSLVRSLYQSLATRSAWMAVSTHEGEETILANVHSALVDRLPGNSREEEQPALLTVIVPRHPERADGIVREIQKQFPSLRLARRSVEGLPTSSTDVFIVDSLGETASFFEAIPTVVIGGSFVPRGGHNPIEPLRAGCQVLVGPHMFNFTDILSHLQGYIGQSLVQVES…
unitig_412	g10307	2939	unitig_412:1074139-1077078	SP(Sec/SPI)	GH2(29-781)	GH2	GH2	3	MATTVLCVLLALYGLGVDASVVQRRRLDTWSFRSENGSIHVANATVPGTSHMHLLADGLIEDPYLRFNEHALRWIADTTWVYETTLEVSASEPRPQRIRFETLDGVAHVALNGASLGGPAVNAFRPHVYELSEAGLQVGINNITVVFTPSLEYTHSQASKYPYYVPATRNFNVWAEPSDRPFLRKAGSDFGWDWGPAYVTTGIAGDVFLEWTESSLPPRLVELNVAYDFPAADNFTVVRGNVTVDVDTLGAEHHNATLRLFIDDKLQHQLRVDLVPSDDDVTSVSLGFELNNPKLWWPAGYGEAHLYTVRVEVATPSGDAEPYVHEVGFRTVELIQEPTSAGGVDGATFFFKFNGVPVFIKGANWIPNDSFPTRVTPTKVSYLLQSAVAANMNMIRVWG…
unitig_412	g9979	1364	unitig_412:120986-122350	OTHER	GT71(68-360)	N	N	1	MSLPLTKHQEAAVPGTLTRRTLWTVLLSLMALVTMSMVMFSSFTLTSYWTAYQAEQLSRISLRTTQPRGIVMPLFDKIALLGFSLILELRAMHVDLPIEIPHCGDLDPHLQRKLQENDPHVRIYNLCEEALAYSVRDNDWRKLFCRTMHECHVRFRGFDIKLMALLLSRFDEVMMLDADVLFFANPMRLWESPKYLETGTLFFHDRISCDREFLATPRRSNEVDMTHLQKYLTSFDAKPFKKFATVPRPLATSKPSRNFTLPFSPSEFLVTSHSWNGRAGHQADSSVMLWDKKRQQRATAILASFITLNGIGRPPSYGDKEFYFIACEMAESNYAFSDFGVGAIGLDARDKDKEGKSVLCGDALHYMPDEMGVTDPPLFYINSDRIMAWSVQDELYRTV…
unitig_43	g9028	6520	unitig_43:120919-127439	OTHER	GT20(47-572)	N	GT20	2	MDPQAFSLSVEAPDGRRQTQSTRDRTAHRYSLVQPPPQHQKRRPSLVKTVIIVVNVLPLVFERKADDSGWKIEWSSSATSLFYRNLVSNTERYLPMFIGCPEVFVSREEETAVEKQLSAFNCVPVFLDPVVAHRYFQGFCKGVLWPVFHNIVDVYNSAKLALDDFEEQDKPARGPSSAHDKASWCHPASWNPAAQDKCWSDYCNVNRTFARRIIERYHEGNMIWIHDFHFLMLPSYLLRKLRTAMIAVYLHVPFPSSEIFRCLAMRTEILRAMLCADHIGFLIFEHARHFLTSCKRLLGLNYKTSPSGMLVVEYNGRLVNISCSHIEPDISYLHSIMDRNDRAEDTQRFRESIEQHIYDAQKQRKFVITSVDRLEGINGLPLKLRAFDRFLSSQPAKRG…
unitig_43	g9062	2669	unitig_43:214873-217542	SP(Sec/SPI)	GH13_32(480-702)	N	CBM21	2	MRQFFAVVQALFVLCAFAVNAQILARNDDGTGMHIYFRTAWTTPYIHYNTGAGWTTTPGLKMTASTDRVHFPSEAGWFRFDAIATSLEFAFNNGNNVWDNNNNANYKVSATATYVVTSTVTSPPNPLVQVQTSDGTGLHVYFRTGWTAPYIHYNTGSAWTTSPGVKMVASTDSTFPSGAGWFKYDFPSSTSLEFVFNNGNNVWDNNNNANYKVTAAGTYALTSSLTTTPYPIPSSSTSPTPTTTSPTPTTKTPTPTTTTPVTPTPTPSTTSTPPTTTVPPSSGCSNYNGLDSCSGDQTSYPDNIEARRWQTPARNSSSWKAEFQDYRSLQGYAHVVYASNRLSATVTVRTYLRVTSGTTCTFSYNGATSSSNQYAATSSLMTDLNIVVTCVNGSNTWTL…
unitig_43	g9076	2570	unitig_43:248270-250840	SP(Sec/SPI)	GH13_24(418-649)	N	CBM21	2	MRQFFAVVHVLFALCALAVNAQILARNDDGTGMHIYFRTAWTTPYIHYNTGAGWTTSPGLKMTASTDRVHFPSEAGWFRFDAIATSLEFVFNSGADVWDNNNNLNYKVTAAGTYVVTSTVTTPPNPLVQVKASDGTGLHIYFRTAWTTPYIHYNSGAWTTSPGVKMVASTDSAFPAGAGWFKHDLPSLTSLEFVFNNGQDVWDNNNNVNYNVLTAGTYALTSTLTTPPYPIPSDPNAPTPTPTTIPPSSGCSNYEGLDTCTSSAQVSYPDSIEARRWQTPARNSSSWRSEFQDYRSLQGYAHVVYASNRLSATVTVRTVLRVTSGTTCTYTYNGASSTSNQYSATSSLMTDLNIVVKCVNGASTWTLNLEPVNFVWQSTGVATPAGFENGQKGAIVDMF…
unitig_43	g9147	1196	unitig_43:441914-443110	SP(Sec/SPI)	CBM9(55-282)	CBM9	N	2	MMGRSLAFAAWICASLPHTTAFRAPAPTPDVDCFYQERHPHSYRAYHLQNGWLTIDGVLNESAWEAVPFSSSFLDIQGRRHWSQPWFTTQVKMRYDDTMLYIGAYLEETAIWANETKRNSVVFHDNDFEVFVDPDGTTHNYKEIEVNALNTTWNLWLNKPYRNGGHENSTRVDPAHGFDMFGHGFESAVHVDGAVNDATQRLHYWTVEMALPLAQLALHTQQEKTMPPQPNTHWRINFSRVEWQVRVRDGHSYEKIPGIPESNWVWSPQYAIDMHMPENWGYVVFEGREQTPPSDNPEPYFDPEWSHRFVAFQVYYAQAAYYKLHGYYALSWSGEVQALVPEPSSIKCIHSVDIRASSKGQMYTAQVVRIHDTRVAIIRSDGFITVEMRKESDLVAIS
unitig_43	g9149	734	unitig_43:445605-446339	OTHER	AA6(47-241)	AA6	N	2	MGCTQSTPVAEPVVNDTVAAAPAADVAVPAAKEPETETSPAADKVTRIAIVYYSTYGHVATLANAIQQGAKIIPGVEVQIYQVAETLSEDVLAKMGAPPKGDHPIATPDVLKEADGILFGMPTRFGTVPAQMKNLFDSCGGLWASGALVGKPAGFFFSTGTLAGGQETTAMTSTTFLTHHGMSFVPLGYRSPLLTNLEEVHGGSPWGPGTLAGGDGSRQPSELELNIAKQHGQSFAEIAKKLSA
unitig_43	g9150	602	unitig_43:447281-447883	OTHER	AA6(4-197)	AA6	N	2	MTRLAIVYYSMYGHVAKLANAVKQGTKLVPGVETKIYQVAETLPQEILSKMGAPPKPDHPIASPDVLKEADGILFGMPTRFGMVPSQMKGLFDACGGLWAKGELIGKPAGFFFSTGSIGGGQETTAMTSTPFLAHHGMVYVPLGYRSPLQGTLDEIHGGSPWGAGTLAGGDGSRQPSDLELDIAKLQGQSFAEIAKKLSA
unitig_43	g9151	602	unitig_43:448870-449472	OTHER	AA6(4-197)	AA6	N	2	MTRLAIVYYSMYGHVAKLASAVKQGTKLVPGVETQIYQVAETLPKEVLSKAGAPPKPDHPVASPDVLKEADGILFGMPTRFGMVPSQMSSLFDACGGLWMKGELIGKPAGFFFSTGGLGGGQETTAMTTTPFLTHHGMIYVPMGYRSPSQGTLDEIHGGSPWGAGTLACGDNSRQPSDLELDIAKLQGQSFAEIAKKLSA
unitig_43	g9206	1307	unitig_43:589257-590564	SP(Sec/SPI)	GH5_14(127-403)	GH5	GH5	3	MKTLLTWIAAVAIAASYSATHIAGEGFEAAVGYTVGTVDVSAEVTASAAQAVPALNQTEARPDHIQHSIRAGKVQSQGVNLGSWLVMEHWMTTDSDVWKGLTDEEANSGEQTAFKLTPRDEALARFKWHRDNFITEAEIEAIAKTGLNTVRVPVGYWIVGYDAHDISNKKQWENYAPGALEYLDRLITQWAKKHNVAVLISMHAAKGSQNGADHSSPEQKSKSLWAEYPENLASTLDAVTFLAQRYQNEDAFLGIGLMNEPSATTTNDVLYKYYEDAYKAIREDTKNDCILTIAPLLTEQSADHMTDLLPNAVNVWVEWHRYFVWGYENSSEDDLLGSLMTKFRDDVEAWKAKSSKPLFIGEFSFATAGKFQDQDRLKEFGKRQMEVMTNNIQGGWTFW…
unitig_43	g9208	1397	unitig_43:594392-595789	SP(Sec/SPI)	GH5_14(161-441)	GH5	GH5	3	MRLLVLATTVFAALCTAQSSEDVPTKNLSAPSLDFSAVAQWRSVDQAHVVPPEDHKPSNPSHVRGGKGNKPRPPHYHHEAKKQHHSIRAPSESGAKHIQYAIRSGKIQSRGVNLGGWLVGEHWMTAWADIWRGLTDEQANGGEQVAFRNIPRDDAIGRYKWHRDTFITEEEIAKIAAAGLNTVRVPIGYWIIGYDNFDSSHKRQWENFAPGGLDYIDRLIRDWAKKHNVAVMLSMHGAKGSQNGADHSAPEQPGASFWSWYSENVASTLDAVKFLANRYKNEDAFLGIGLLNEPSGSTSRDVLYKYYQDAYQAIRIDGQNDCVLTIAPLLWEQSPWFMTEVLPHSTNVWVEWHRYFVWGYENASPDYILNGAMDEYRRDVEIWKQRSNKRMFIGEFSLA…
unitig_43	g9209	2402	unitig_43:595881-598283	OTHER	CE10(482-734)	N	N	1	MEDDPTRPAVIVPALLASSGLTPSPTATFQPSLRSQSSVQLYGFIESCIPPASTALQEITDEEELRAKGHDTLLNTCKSVLACIQILRRIIREYAYGRMGRELQHLSLTVASFERVLYTFIKEEIIMASKKYNQQERIDFRSKTALKDVIPLIPRDERYTILSGGVASLLRHATKSLDETRQVLEELQSSYDPKWEKRWSLSSFAILSITFFVYKRFAKRTSFRNFLIQVFPSRQMMKWALVALVCLDYWNRCMYRFSNLRRIKIHHSRVLMALRLFLLCQHVLQRARPISNASDHRLLIDSPMESDIDDDLKNATTLLVERVPLPAEYYDRSSEPVGFTAFKIGTSVLTASSALTHAILGRRNKKLFEVFGPMFVLCMVPFYTIRNRQALRYTTRILI…
unitig_43	g9213	3611	unitig_43:606984-610595	SP(Sec/SPI)	GH31(395-951)	N	GH31	2	MTEKKRNCGVKWRWMLWTTMILFGRRTDALAVAGICTKEPTTRVDCYPPVDNFPNATEEACLAQGCCWKVLDNGGVPCAFDALDEPKEERCTVVSSVSRIACRNPRFAMPVDDARTCHAMGCCYDDESSECFQPFFEGYELLSLEETSDGWRGSLALRRFARGPFANDVPLLVLHVVRVSPSTVRVRITDSTFPRFEVPDIPVSCVSDDDGDTITAASGSDDEYDVGSSGSDESGSSDETAADYQVHFTERPFGIAVTRRNTGEVLFNSTPSTSSHSTFNGLTFENQFLEISTHLEKHDGVGTPVLYGLGEHYGPVRLRAHRHGDHYPMFAQRVEGLEEHTRRGGDNLGGVHPFYLQVLGSGRAHGVFFLSANAMEAVTQENALTFRSTGGIFDFFVFT…
unitig_43	g9218	2041	unitig_43:618925-620966	OTHER	GT22(18-410)	GT22	N	2	MTLSATLMNMTLDAVDALVILVVSAHIALCPFAKVEESFNLQAIHDLLVHGVRNVERFDHIEFPGVVPRTFLGALAVAGITSPLAAIAKHIGLRKIALQVLVRWVLAMMNVTALLRFKQSIRARFGKDAARFFLLICVCQFHLKFYLGRTLPNTFALGLTLYAFAFWLEFKLKRAIFLFTFTIIVFRGDTAVLFAPVLLWILLHGGLSIFRVILWGIQATLSSLVLTVLVDSYFWQRWLWPEGEVLWFNTVQNKSHEWGVYPPLWYFYSALPRALLATALLLPVGVSVLLPALLKSRSFKQLRAAFTSAPLVDWSVATFVWPVILYLALFSILPHKELRFIFNAIPILNMVAAVGCSKLYHDRKKSLLPFLAAVGCLVATLLGSAFFFTASRLNYPGGE…
unitig_43	g9269	3632	unitig_43:761122-764754	SP(Sec/SPI)	GH19(107-299)+GH19(319-525)+GH19(544-749)+GH19(771-965)+GH19(989-1201)	GH19	N	2	MKPWLVVGAYVACAVWLAEARDFDALGAAAGDGSNVDTTGKVHGSDTPFIAPGSGSNDNETPAASGGAVLEAGEVASSGSAAAELHDNGYLADILTKDNFTTWWTPSKVYTYEGLAVAAKDFFDSKFLAEEAPEDRKREFAAFISHALAETSLQRTETDKPIITVDGKENKYCDRTYVSCANGKSYHGRGPMLLTGNENYARCSKALGLNNLLLTDPDRVATDSKIAWGSAIWMWMHDDGLGNLQSFAKKDFASSTALFKGRVECGPTPLKKTGDNYRTQIYNTTCNLLQIQPDENMHCSDIAISTDEAPNPDEVDSSKAVKQFLSAELFKELFPEATDLYSYEELVKAAAYYPEFASTMVEDASNARELAAFLAQAAAATDNFKVRVANYADRYNEDV…
unitig_43	g9348	1595	unitig_43:964472-966067	SP(Sec/SPI)	GT1(189-442)	N	N	1	MRVASLFAGLSALALSASVPVADALNVAIISTFGTRSDIAPIFEGLRDFAMVPGNKVTFIAAGKGLASGYASNFKEYVETVVVDELELPEYLDTFIPQIMEKNLRIDNTAMFLDGINLIADVYETNVQIFMEQFRKYKFDLVMCDAVEQSCMDAAKETKTKLTIYGPLGQYGVGADWYVPDFLDPVSVGDWIASPWRRAKGYIDMIPFVFAMLQARSKIIAAQAKLNMTMEYLEPWDYPQRHMMLSHHVLGIDPARSVPTNIQVFGPIVHEANIPPLEPEFQVALDNFKAEGTRVVFIAFGTLLTFKKGHVLAEELLAGIETLISDKERNVAVIWASRHHHHDMIAPLQAKYPGRLLTPTWVNQRRCLMHESVKVMFSHAGYGSMSEALLEGKAQLMMP…
unitig_450	g11387	1760	unitig_450:28968-30728	OTHER	GT22(34-461)	GT22	GT22	3	MTKKLSKTQPRASMATKDTEERHLWTPTLETAVSLLLVPRVISSLLNPIADCDETFNYWEPLHYLMYGFGFQTWEYSPLYALRSYLYLLVHLVVVKLASWGFSFSLVGTTGVVSKVMLFYGLRGALALVCSYCEALFYRACIPHFGRRTARYLLWILLFNAGMFHASTAFLPSTFVMYLIMLFLTAWMERQHFLAIFWGVVAVLCGWPYVGVLFVPFMFDTLHARGVVLSLIAGASIGLVVLTAEIGVNFFYYRKIVLPAWNIVQYNVLSSETDSTLYGVEPWSFYALNLALNFNIAAAMALPSLLVVFLLPRSASAGAGRRLAFLSPLFIWLAIMFAQAHKEERFLFPVYPLLCLGAAITLSSAVASVWGVFGPGSSFGNFTVTVLVYGSLGLYSLLS…
unitig_450	g11393	965	unitig_450:62848-63813	OTHER	GT2_Glycos_transf_2(8-178)	GT2	GT2	3	MATKHKYSVLLPTYNERENLPLIVWLLDKSFSENSLEYEIVIVEDSSPDGTLQVAQELQKIYGKDHIVILPRQGKLGLGSAYRDGLKLATGDFVILMDADLSHHPKFIPEFIKVQATKNYDIVTGTRYIGDGGVFGWDLRRKLTSRVANYLATVLLNPHCSDLTGSFRLYKRDVIEDIMNSIQGLGYVFQMEILVRARLKQYTIAEVPITFVDRIYGESKLGAGEIVAYLKGLVQLFLTT
unitig_450	g11433	3074	unitig_450:177936-181010	OTHER	GT2_Glyco_trans_2_3(633-846)	GT2	GT2	3	MKGETDAYEMYATPSAMEAEISRRGTEHNVRMTESRPVPQHGYVDPRAPPQPPMNMSEAVGIGSIKDNIISVHGYMHKQGKRTIKGPIHKSWKRRYFALEKAKIYYFHSHLDCRQYFTTRNADLVVGAVELKDALQLRPSARLDLPHKGFEVHTKRRVWVLCPESDEEYRMWFEGVEHAIIANGAGNIIERKLPNVRKYQMKGIATYRVLYFLFLLTGIMELLGMLFWFVVGLEPCDAARPSVDCDTITSTSLIKLRCTDQPLSGWFSPPSWYLDLAGVDNVVCFHNPPIPQWISYFALLFAEILSFTLGVFYYIGMWKPVRRGAQYFDEFEPKVPDEQWPRVDILLCHYSEPAEECIDTLMACVNIQYPPHLLHIFVLDDGYCKAKWTKGNPVPQIEL…
unitig_450	g11434	3131	unitig_450:182191-185322	OTHER	GT2_Glyco_trans_2_3(657-861)	GT2	GT2	3	MFARPSDKRELLHEDDPDYNLHATPAATDARPSTQYKEAEIVRGGAPMYQEGRPTPQEGYVDPRAPPEPAMDVTAVGGDNRDSQKDNIISVHGYLHKQGKRSAIKGPMHKSWKRRYFALEKAKIFYFQSHLECRQYFTTRNPDLVVGAVELKDALQLRPCARLDLPYKGFEITTKRRVWVLCPETDDEYRMWFEGVEDAIVAAGSGNIIERKLPNVRKYQMKGIKSYRFLYFCFIIACLIEFFGLLFFLVVGIQPCHLEHRTWTCEKIELNTPNVLTCTDKPFSGYFSPPSWYMDLAGVDDIICFHNPPIAQWVSYFALLFAELITFFLGILYYLGMWKPVRRGAHYFDEFEPRVPDELWPKVDVFITRYAEPAEECIDTLMACMNLQYPPHLLQIYVL…
unitig_450	g11462	1972	unitig_450:254871-256843	OTHER	GH5_20(172-527)	N	GH5_20	2	MYQESPHGTESNASTTPGRIWRDTSEEQTYGNYLDNAQGNTPHDMQLRPTFAGARMTGAGPGAHPDIAVGLLEDDGSDGGAAAVAAKKSYSGRKRVWPGALFLLVVCLAGTFAVTYFGVQQYNAAQKQQAISEEFTSLQKPKKALPLKVCRVPNYVTDKGKLYAIGGSKDEKHEVHFTGINWSGMENKEGVPHGLAAQQTNLDAIAQGLNDMEINAVRLPLNAKMVLDDSAPDVNSFVSRTSADLFAVTTYVDMIKKIVQGLARKQVAVLLDLHKIDPEYAESTSEELWYTDEYPEATIIEMFEKLAKELCNEKHYNIIGVDIKNEPAKGCWPAKDSDSYCPKNRNWPRAVERIGDAILKVCPNWLIVVEGLAASNIVKKINGKEVTYSDWLGASLQNA…
unitig_450	g11469	989	unitig_450:268766-269755	SP(Sec/SPI)	PL3_2(28-214)	PL3	N	2	MLTKFAAVAFAIGVTSALPVPTGTWPESTGVVQNPAPLTIKAGEVFDGKMQTYERSDITCQGQKESGKKDAVFLLEPGATLKNVIIGKNQMEGVHCDQHDCVLENVWWDDVCEDAFSVKGGTASSVTEIRGGGARYADDKVIQHNGLGKVIIDGFFAQDFGKLYRSCGTCGAKTREVEVSNVYVVNPKSSVVTVNVDNNDKATLKNVYVESTKKNLKVCAKSYSTDGAEPTEAGSGADGKICIFEESDIHLNQKPSGSASNSTTVPTTVPSTTPTTVPSKTPSPTNDEGSDDDETPEPVDDDDEADGDADASSSPTPAKTGCRTRRRRN
unitig_450	g11494	1908	unitig_450:332581-334489	OTHER	GT8(252-485)	N	N	1	MEKKQSVMLPLLLAVCVAQVVAPATVLHSTTKLQVAPGIAAVLAIFLGLFVCFYGYKLLRPAIFLCGFVTGGLLVALIIQYAFASMAWMATASWIGFLVAGGITGCLALWLYNVGLFLVGALSGILLAFMLNTSFGYRIYPSQPDVMLVIMVVFFGILFGFLASMVEKPVVILATSFIGATGFVWGVGYFIGKYPSGADLKRFRWKNPSGDWIYTIPKAWWAYLVVTLLLFLAGVVVQYHSIFLDLDRSKMNDARRVYATLITSDAYVMGVEALAYSLFKANARYPLLVLHTPQVTSACCEKLARFFQPLQAKLPISLRCVPEIGIPERTEHVHVAGWVNSGYSKLNIFALEEFEKIVYIDADALVLQNVDELFDRSSSFAAAPDVFPPDRFNAGVLVI…
unitig_450	g11496	791	unitig_450:336521-337312	SP(Sec/SPI)	PL3_2(32-228)	PL3	N	2	MVNTVTILCAAALAGPAIVNAASLPTGVWPASKGTVTYAAPKVIKTGEVFDGGMKTYERSNVKCAGGEGGKESAVFLVEPGATLKNVIIGKNQVEGVHCEKHDCTIENVWWTDVCEDALSIKGGSASSVSKVIGGGARYADDKVIQQNGPGKVSVDGFYAYDFGKLYRSCGNCKTQYKRQVEFKNVLAVKPKVSIATINTNLGDTATFTNVRVQSTKSNPKVCAWSQGVTSGEPKELGSGPSDKCKYSTSTVTITKISRLLRD
unitig_450	g11497	791	unitig_450:338020-338811	SP(Sec/SPI)	PL3_2(32-228)	PL3	N	2	MVNTVTILCAAALAGPAIVNAASLPTGVWPASKGTVTYAAPKVIKTGEVFDGGMKTYERSNVKCAGGEGGKESAVFLVEPGATLKNVIIGKNQVEGVHCEKHDCTIENVWWTDVCEDALSIKGGSASSVSKVIGGGARYADDKVIQQNGPGKVSVDGFYAYDFGKLYRSCGNCKTQYKRQVEFKNVLAVKPKVSIATINTNLGDTATFTNVRVQSTKSNPKVCAWSQGVTSGEPKELGSGPSDKCKYSTSTVTITKISRLLRD
unitig_450	g11498	755	unitig_450:338991-339746	SP(Sec/SPI)	PL3_2(36-218)	N	N	1	MVKFVSLLAVAALAAPALVTATKLPGPGWPDYAKKIVNAEPIRVRSGEVFNGARNKYERANVTCDGVGSLNESDAVFIVESNATLRNVVIGTEQKLGVICPTSDCKLEEVWITNACGTGILAAGGSPTSLVNITSGGARGGNQIVYHTGAGRVLVDAFFAKGVDKIYRPAYSVNDKTQRKVDFVNVRAENPTSAVAFLNRETKDVATFTNVHVTDTTKRDEVVCVETEASLPVGHGPSDLCKYKSTDIVFE
unitig_450	g11499	884	unitig_450:341780-342664	OTHER	PL3_2(9-203)	PL3	N	2	MPTGTWPSSKGKVTYKAPYVVKKGTVFDGGMKTYERSDITCTEGEGGKADAVFLVEPGATLKNVIIGKNQKEGVHCEQHDCKIENVWWDDVCEDALSIKGGSSSSVSTVTGGGARYASDKVIQQNGPGKVTIDGFYAYDFGKLYRSCGTCGNIPRQVSVSNVLAVNPKVSVITVNKNYGDKATLKNVKVVTTSKKPICQWSQGGSSPKNLGDGPSGTLCQYSTSDVYITKEARDSDVEIEVSSSTDEYAGQEEEDEYNVETEAPTTDDEYPEELPGNATEPDATKKTGCKTKKD
unitig_450	g11554	1854	unitig_450:463146-465000	OTHER	GH5_20(130-470)	GH5	GH5_20	3	MDKSEHPTSTTALRIVASKEEDGPSSTAYKGQYRRWPGVVLLVAIVALASVLITTKARDAYDASVKRAAEFEMYKQSGRRIKDGTTAEGDIISDDGQIGNPKQYDTSSDCALPDYQSKNGRLYAVSSNGTEVPFRVKGVNWFGMETDLAVPFGLWENQMNGTTAYEVAAFLSRNKFNAVRIPISIENVLNNNAPKEGVVNKASNRALNLKNYITTLQSIVQSLAFRRIGVLISMHRLTNTKAGANWFDEALGVSQEDFLKAVSIISKELCGQEYWNVMGLDLKNEPEKAEWGTGTDADFVTGAEKIAKVMHDNCPNWLGFVEGVVDERSMTLDGKEITYYDWWGGGLQDAAKSRPKFKIENKLVWAPHYYTTAVAPQSYFYGDKTTADYSTYEELGDED…
unitig_450	g11555	1914	unitig_450:465747-467661	OTHER	GH5_20(178-520)	GH5	GH5_20	3	MADVEKDVGANRPTYVNSEFPSGQFRYSEDAMLLDTNNLNSSRMTMSGGLGSGMRQTEMKITAIEPDDASPPERKKDYKGRIRTWPGILLFIGIVGAAVALITLEAVDAKNKAADQAKQWELNQQGNRKIQDGLNSSNDLIEDDGQIGNPKKYPDMGCELPNYQSKNGQIWAVAENGTEVPVGIKGVNWFGMETGLAIPFGLWENQENGTSVYEVASFLARNKFNSVRLPVCVENILKDTAPMKDLVNLNTNRAMNISTYMTTLQSIIEALAYRHVSVMISVHTLTTKSSGGAWYSAALGVTEDEFLTAIDKLTSNLCTDKYWNILGLDLKNEPHECSWGGAEPDWQKGATLIGNRMLKGCPKWMAFVEGINKEHSFTLDGKTKSYFDWWGGGLQNADK…
unitig_450	g11587	4706	unitig_450:560921-565627	SP(Sec/SPI)	CBM13(774-919)	N	N	1	MVKMLLLTLLASVVALVTAQASGPGTVGPNSALAVGEYYRPLPPVGSGRVRTTAAYRRGPCPAINTLANHGYINRDGKNITAESLVAAAVKWFNVDEAYAATLVRLAKKPVFNLDDLSVHNNVEHDMSLVHKDAFFGQDPAVVDPELIDDLFGHVGSSGILDPWFFARTQQRRLRECLTSNPQCEYSNEFLLGVTLGRQGLVMRVMGAKNEEAAPIKTVRAFLTEERFPDGWVKSPKPIKQDEIQSTRVKLYALLRSSGDWLADGFGTSSQLLRSDANPKLCLQVTGKETSAVDTPLAMVKCDSGKGEQKFVLDEKKRLIVDHSELCLEVEAGSTVAGAVVRQAECGTTKQQKWMYDASGRLRPVHAPDLCMNFNETLVVMKDCGNSTEQRFFSYYANF…
unitig_450	g11588	5182	unitig_450:566108-571290	OTHER	CBM13(585-734)+CBM13(1091-1208)	N	N	1	MRRKREALDTANEAAYAARGVRLLQEASRAATAPVDAIVETGSNAKRQRLGSPKEEGKEHEVSAVSAVGSGDSVVGAVAVASEREDETWDAGAFRNEIDELRRKNDYLAQEIDALRQHITNRDESSAFVDARDGRLAMIDEHDPHRTVHAYQERLRSGLKLIRDSLSKMEESLKNTDASRSPENRTTQELQTFHAECNRQMTALLRRLDDVTSPPVTETGVEHKEPEPSAFEQGDVYQMHLASVEPRWAQVERGLAQRMSYFSTQLDHLRVQVSKMEQDLMQENELNTRRLENMLAQQMAQSRQQHSVETKRLQPRINMKILSLVALLSLGVPAIHAADDAVDLSTLAEGEYYRPEDASGGVDATNKVRRSPCPAINTLANHGYIPRDGMDISTKALRD…
unitig_450	g11643	6229	unitig_450:724397-730626	OTHER	GT48(1141-1869)	GT48	GT48	3	MARGDSGGDSDDMSNMSRALQRQKELCDRGMALVNAGVAMQNASPPDVAGAEAKLSQAVKIMDEALAIEYATEEERDASQRLNSKMNRYVKMIRSQLDRSASGGSSAGGAATTKYNILDLDHLPVIYNPIVELLTNSQAVGDIFEALKRTFGFQEGNCQNQKEHLLLLLTNFKEQSEDDKDAAVGDGSEVMQRDPQKEMELANKGIKRFHGRIFANYIKWCKYISTKPAFTSDPLVDVVLFFLIWGEAGNFRQVPELLCFLLHNMLPQATSRSGDKQPGDFLAEVIRPLYTEVKKDNDKKTVKGQRAAHAEIRHYDDFNEFFWSKKCLKFNATSIAGAFGEVDKNGRPKTVKKSFVEKRSWSRAIISFRRIFLCNCALFMAVLGFALNVVMYCPDTPIL…
unitig_450	g11644	6080	unitig_450:731538-737618	OTHER	GT48(1114-1838)	GT48	GT48	3	MSMSGMMTEALEMQRQMCDEAMNLVKQGTAMQNAQPPNVAGAEASLTRAVDIMEQALSIRYNSAEEKDAAERLNNKMLRYVKMIKSQRAKNQGGGAAGKRQMQKHNILELENLPEIYAPVMHLLHNSQALGDIFESLKQTFGFQESNALNQKEHLLLLLTNFKEQADSFDDGKKKKKKNKKMTGEEALEDYMRQRDPQQEMDLANKGIKRFHTRLFANYVKWCKYVSKKPAFTSDPLVDVSLFFLIWGEAGNFRQTPELLCFLLHSMLPQATSRDNKESGWFLANVIRPMYVELKRDNDKKTSKGERAPHAEIRNYDDFNEFFWSKKCLKYDIKTIGEAFANVDKKGRPKIVKKTYKEKRTWIRAVMTFRRIFFFNCALFLATLGFAMNMVLFCPDSPI…
unitig_450	g11707	923	unitig_450:896209-897132	SP(Sec/SPI)	GH17(45-300)	N	N	1	MKTFLLALVLAIATLCISVNVVEAKGVCYDPIHGSAKVTRNSINADLRRLREAGFRSVRVYTATLVNENLGKRIIDNKMNAAITVPFVNDRPGDSESHIKAAIEAAKYRVGNNRVTHIYVGNENLASVNAVPQKMFDYIARIKAAVPSDVRVGTVQRNTEYLDPARNGMSRLKELLSKCTIVGVNIHPVFTPNTPANKAINVVNAQWNQLMGNVSNRFPGLSGKIAITEVGWPSGGSLNGNTGSKSGALTFMKAYAKWRRNNIIEGRSFFFQAFDQPQRTDGPFEKFFGVFNSDRSKKYSSFNFNDM
unitig_450	g11709	686	unitig_450:898790-899476	OTHER	GH17(28-225)	N	N	1	MNAAITVPFVNDRPGDSESHIKAAIEAAKYRVGDNRVTHIYVGNENLASVNAVPQKMFDYIARIKAAVPSDVLVGTVQRNIEYLDPARNGISRWKELLAQCTIAGVNIHPVFTPNTPANKAINIVSAQWSQLKGNVNNRFPGLSGKIAITEVGWPSGGSLNGNTGSKSGALTFLTAYAKWRQNNVGDRRSFYFQAFDQPQRTDGPFEKYYGVFNSDRSTKLSFNFNNL
unitig_4	g2820	9234	unitig_4:19299-28533	OTHER	CBM47(2223-2360)	N	N	1	MSIHFKFKSAKEFDTVTFPGAVIRVLDLKKAIVDKKKLAKGLDFDLVITDAQNGKVYDDENMQLPRNTSVTVKRIPSLQPGSGLLARMKAEAAAAAAAAATAAAVPALAASPVLPLGVPQGNIPSAPLMVVADSSQVKQGEGAQTMEDELAALQSIHEQAEDMRGARLGNKTWTASSGSNADKVANYYAGIPSGAGAAGGRGFNPMGGRGPMGGRGPGDGGMAGRGRGGPMGAGVHPSMMGKPPPSYVCFRCGTPGHFIQNCPTNGDPEFDHHRVKRRTGIPKSFMKAVSDPSEIPVGAGKTVVNAPWGGLAVIETQNKNFSKLMTKSGGSATLDQLISNPPDHLACPLCKRLMNDAVLIPCCQESACDECLRSALIDHNLTCPLCNTPNMSPEKLLPN…
unitig_4	g2847	3441	unitig_4:86474-89915	SP(Sec/SPI)	GH38(69-370)	GH38	GH38	3	MRAPLLLRCATAALLSLTLSTSTTAQSPPPTTLIPLNLTKTENCDPSKWKPPVDGKYNTQGKIDPNKLNVHLIPHSHDDPGWIITVDQYYYERVQFILDTSIDELLKNPDRKFMFVEQSFFQRWWNEQDSKMKETVKQLVKEGRLDLSVNGGWVMHDEAAPHYIAMIDQTAYGHQLLKDEFNVTPRIGWQIDPFGHSSTQGSLLSAGVGFDALYFARMDYQDYGKRFANKDLEFIWRPSKSRGKAMQTFTGQMIDHYGSPGHFHYNSDTPVQDDPTMHDYNVCDQVNWFVDTSLMRGAHTKGNHIFIPMGDDFAYQNARKWFKSIDKLIHYVNQDDRVNVLYSNLSYYTDLKLAEDLTWSVKTDDLFPYASQDHEYWSGYFTSRPTLKKISRVANSLLQ…
unitig_4	g2852	2528	unitig_4:95322-97850	SP(Sec/SPI)	GH89(77-746)	GH89	GH89	3	MRYAGLSALLTALLVAVAATTALGQTPELQVPLHDPVAAARGLITRRLGAAYNDQIELHVIPAADDGLDVFEVGNKDDKISIGGSSATAITYGLQWYLKTVVHTQTDWDDHELQLPDKLPKVDSPIKQKRATKYTYYQNVCTVSYSSWTWGWEKWEKHIDWMALNGVNIPLAFTGQEKVWQAVFKNHYNISDAGLNKFFAGSAFLAWGRMGNLRGSWVKGPLPQAFIDDQYELQLKTLARYREFGMIAALPGFAGHIPEELHVKYPDAKWMRSPNWGDFTDEFCCVYMLEATDPLYLDIGRKFIEEQTRLYNYTSSLYQCDTYNEMDPDTTDPQELAAASKAVIDSMTAADPKAVWLMQGWLFLSGYWTKDLTRAYLSAVPNDRMIILDLYSEVVPIWS…
unitig_4	g2860	1268	unitig_4:117314-118582	SP(Sec/SPI)	GH71(25-399)	N	GH71	2	MKAILALLLVALASLASTVAAQKLVFAHHVAGVAADLTPEQWKSDMKLAKNHLIDGFVLNIASGDPNNEKIIKNAFDAADNVGFLVFFSFDYASRGAFNTGNVIDYINRFKGRKSYYKINGRPYVSTFEGPGNANDWVSIKEATNCFFVPDWTSLGPNGIKAHLDKIDGAFNWNAWPDGPTGLSPAGDDAWRKAINNKHYLMGVSPWFYTSLPQWNKNWLWRGDNLWHYRWEDVIKFQPSMVEIITWNDFGETHYIGPLYPSGFPQGADYCKDHPHQAWLSVLPNYIARYKGIAVPKGNDKIVYWYKRNYGKSCASGGTTGNNVAYQKGYQPFEIQQEKIFVTVLLDAPAKVHLKIGTAAEQVFTSTKAGLFHFDAPKNGALGAVVVRVVRDGKEVRKA…
unitig_4	g2984	2003	unitig_4:475167-477170	OTHER	GH47(161-601)	GH47	GH47	3	METRGIRRSGVLEVDQFSPMGKSLSSSSRSGARPKTSGRSCSFALLLQVFLGLLCVSFFLQWWHWRPIPLVNRHALHATQEANDAYVNLRGGEHVEPATQGEDGLTTTPQKRLTLPPTLAPVANGAFRPPTSDTSPEEIRAWRQRFDPSKHNADQQQVAEMVKWAWKGYEDFAFGYDYLDVVRMKGDGLPGHDMAITLVDSLDTLFLLGMFDEFDHASDWVGKNMKDRIYQARHISLFETTIRNMGGLLSAYYLSGHEQLLTAAADLGEALSPAFTVHDHGIPGKDFDVIHKSDHDSSSIAEVGSLQLEFKYLAYLTGNRKYYMQVERIMDKLFSAVNNRFTSGLLPVHLSMNSGDIVPSKVTLGAFGDSYYEYLLKQWLQSGKTDDKYRKQYVTAVQG…
unitig_4	g3010	3399	unitig_4:540592-543991	OTHER	GT20(29-544)	N	GT20	2	MEPHAPSTNSADRDASNRASVDGWDPSIPVIIASNRLPIRVHRRELIRRNSTVEGEDTQDSGASASQYEWDVEWAGDRVIEAHDSFSHRQISDRTSIKFVGRIAEWDVPIDDQPVLAEKLKAFNCYPVFVPPEEARLYYEEYCKQSLWPTFHNVVDVYSPVEVIPEDERDKDGETKPAHYWTPDSQKLAWQAYANVNQQFAAKICDLYEPGDVIWVQDYHLLLTPSYIIRRVRNANVGLFLHLPFPSSEVFRTLSARKELLRGMLNADHIGFHLFEYARHFMSACKRILGLSYHPILRGQLGIDYGGRRVAVTCSHMAMDANQIDATLAESAVRERIVSLRQRFQGKKILAGCDTIERLKGIPLKMLAFDAFLTRCPDFIGKVVLVQKGIHRRGRLYDY…
unitig_4	g3021	2238	unitig_4:573551-575789	OTHER	GH5_12(27-530)	GH5	GH5_12	3	MSARSTTSTMSHDQLHATFDIRHGHFVDAQGRVHIFRGVNLGGSSKLPHGYTHSDPLQRARFFDDVASVSFVNRPFPLAEADEHFSRLRRWGLTFVRFIVTWEAIEHAGPGIYDREYLQYIRAVLEKAAEYDILFYIDPHQDVWSRWTGGDGAPMWTLESIGLEPRNFEATKSALCIETANISSVDKFPKMIWPTNYFKYACATMFTLFYAGGRFAPSCYVNGVQVQEFLQSHYINAMTELARVLVGLPNIVGFGSMNEPSCGLIGVEDLSQCFQKTELRYELAPSPFQGMCLAEGIPQTVGSWSNGIKQHVFGRPDKMVRVDPQGKRAYKDGHRCVWLQEGVWSMDAQGNATLHKPNYFSAVNFDRDFYVPFARRYIEQIRSVLPATMLFVELPPLEF…
unitig_4	g3182	2684	unitig_4:991562-994246	OTHER	GT2_Chitin_synth_1(202-364)	GT2	GT2	3	MPMPPASIRSCGSQAYVSSFIPTSNPFEPRSVQDLISSMKSYASATDFVRTYNDVPSVEEALATLERAAVALKMRRYRDALKLYLEGGYAMANVAERQSNPKICNLLTSKGFETLNWCGKLCDWIEGRVDEKYPRPGVHKVGIPVAAWNEDWIGPNIDEEEAKRLWYTPVYCPNPVDFTNNGYRLRCVEMQRRPRLMICITIYNEEPHQLKATLRKLSNNLAYLKELNADKSSKKLSGTYSGDDVWKNVLICIIADGRENIHPKMLEYLDKIGLYDEDLMTINSAGIGAQCHMFEHTLQIMEDGKHLMPMQAVFALKETKASKLDSHNWYFTAFAEQIQPEYTILMDVGTMLTKSALYHLLHAFETNQQIGGACGQLTVDEPYRNLSNWVVSAQHFEYK…
unitig_4	g3232	923	unitig_4:1113466-1114389	SP(Sec/SPI)	CE1(54-224)	N	N	1	MPPKISLLCGLVVAVLGLLTTSVSATGRIVFSPGCFNVLSKPIASGTYTININGTDRQYVVRVPSDYRRMYPNRVILALHWYGGSIADVEGSSNKYGNGSYYGLQDLAKAKRQEDSTIFVAPQGLTSGPYGSGWYNVNDDDMTFIDAILQTIDYGLCIDMNQRFAVGFSFGGSMAYALAHTHATTFRAVAILSGTIFTPFTPEDTPVSVLFSHGVSDPGNKITTAHQMRDTFLEKDGCEAVPENEPAPGSGTHIKTEYKRCKSGRAVTFIAFDGVHIFSPVDVGDSKSWVPEEIWNFFMAAPVPCSS
unitig_4	g3406	1360	unitig_4:1550313-1551673	OTHER	GH18(60-346)	GH18	GH18	3	MDMRAFPSSAESAKGYLESCPCASPSWCLPVALGPRGNETKKPEIFAFSVETDDRWKYYDWEKVTTVAWNVDKELMCHAHSKGVKIVVKHNFDDTDKLCDAGARRQWIQDTYEMIVSNYADGVNIDTEKPMYGNTARCQTQLVRELRTELNRHPLTRHAQITFDVSWAPRGVDGRYYEWQAIADVVDFLFVMSYDMRSQIYYQCIAAANSPLPLVRQGLEEFIKGFGIAPSKLVLGIPWYGYQYACDSYTPDNDICTIRAEPFFGAPCSDAAGKQINYGDIQRLVRTHGNSSRRWDALTSSPYLVYHDANPDTVIQLWYDDEESLRAKYRLVKELGLRGVGMWNADTLDYAEDLVGSQRMWDALEAAA
unitig_4	g3411	1750	unitig_4:1560792-1562542	SP(Sec/SPI)	GH72(39-349)	GH72	GH72	3	MSRVIKVLATALLALGGLSVSAQNTTTTTSTSTSEATSGVIVVRGNKLFNAKTGERFILKGMTYEYAVHDDNYEKYSKAIIDKHLADVNLNTLRLYDINPDLSYEKFMTDMAKRGVYVVVGGTPDNNDYYTKYRYATLKKGTGPDEGETCYSPVLLEFGKKVAKNFAKYDNTLAILVGNEVMQKDLTAGACVKQYVADLKTWMRANIKQMRLIPLAYAAADSAYGGHIASAEEYHTLKIQGLLCGDKMEDGTMTRSIDIYLINEYRWCPDASFAVYQQFQNMAQGLPIVIGFGEYGCKLRTDEPRLWQMVPYLYDEPAKTEGFSDLWSGGLAYSFGEAKLPKGSLFPMFSGGSMDPLKEPSSVPSPDFDNLKKLFTEHAIFSQKAEWKDDAKCKWTPEV…
unitig_4	g3480	2141	unitig_4:1753882-1756023	SP(Sec/SPI)	GH17(57-308)+CBM13(352-448)	N	N	1	MRVLRPSVFASALLVLAAWTQSTVDAGINGNERLYGINYNSRKGPDWAPDAQRCKSDGEVQNDMYQLRTVADRVRIYSLRDCNQPWQVLPFAKKAGLKVALGIWTTTNDADFNAEKQQLGWLIDAGHVDGNVVGLHVGSEAIYREELTAGQAIKYMQDIKSYLVSRGLGHIPVTIADVVDSYYYNPGLIDAVDVVSINQFSFWEKTDVDEAMHQMLDRLRDLRVRVAAKGKKMLISETGWSSKGKNNASSEATPESQTHFFKDFYHQAKARDLEYYWFVGYESQWRVTSEEHEVEGHFGIFEENGQMKSNFQALQLGTRDQKTIRSSAGLLLAHEEDDAVYLGEESEEWLEQEKQTWLFDSSSQQIRSKYSDLCLDAYEPWNGGTVHVYKCINGEPNQK…
unitig_4	g3532	1478	unitig_4:1876751-1878229	OTHER	GT4(298-460)	GT4	GT4	3	MLLLVSLLATAYPLFLLGLLVLYVSKKRRIYAHHRRLGRTAEATSDGRMLTIGIFHPYANGGGGGERVLYCALAALVKRMKQQSTAKTLRLVLYTGDDGLDAATLIERSAERFNLPELRALRVDSFLKIVTLTKRAILEPSQYPRFTLFWQSVAHIRLALEAFAAGEKMGLYPEVWMDTTGCPFSYVVAKGLYACRVVAYVHYPMISTDMISKVQERTTGFNNNSAIAASTSRSYVKYIYYRLFAGAYGVLGRTCTDVVMVNSTWTYNHIKTLWSGSPIIVYPPCGTMEEFMAFDVQSREPLALSISQFRPEKNQLLQLQAFKVLLTKYRTQVQQLCPNLKLVMLGSCRNADDEERVVALKEQCADLGLTQSVNFVVNASFAELKKYLARSSIGLHTMY…
unitig_507	g5058	1202	unitig_507:145842-147044	SP(Sec/SPI)	GH5_14(101-378)	GH5	GH5	3	MKFSFAYLHRRKDFMASCVRLVVLLGCFLSAYVEGEHIQAAIRRGSVKVKGVNLGGWLVAERWMTEDAEIWQGVPQGIADQGEFVTMQYLGHSVGDARFELHRSTWITEPDIAEIARSGLNAVRVPVGYWIMGAGSNSNANTPNAGQWGVFAPGALKYLDELINSWALRHNVAVLLSLHAHQGSQNGKDHSAAPGGGVKQWSQYPANVDNSVELALFLAGRYRSSPAFLGMSMMNEPEYPTSPSVVMDYFRRVHQQLRSQGDDCVLVTAPMLSEQSPAFMVDFLRGAPNVWHEWHPYFKWGLEGQNEGQLIAAAQQYGSRIAKWSGNPLVLSEWSMGVWDQFAPFADNALYKHFGATQLAAYAPARGGYFFWSWRHSDDSKGKRSGWSMRGLLRAGLLSV
unitig_507	g5060	1736	unitig_507:149500-151236	OTHER	GH72(47-349)	GH72	GH72	3	MTNPPTTTPVASGNSTAAPTTTPVASGNSTAAQTLATSATATTGKGTNPLVIKGYRFFDSVTGEYVGMRGVNYYPRTNTGALDANNLDLFSDKFKHIWERDLPQFAALNANSIRLYAVDADANHDEFMCALQSLGIYVLVDLGSSCQGCEITADKAPTCYPASYKQRGEKIIKAFSKYDNVLGFSGGNEINHRTGGNPPQWNAPCQKKFVRDMRAFIKSCPSMRQIPVGLVMADTSRPENAKYYNCRTDPNDKLENAEWYGINVYVHCDDINDPTKAAGFNLLRDDFESYDYSIPVILTEFGCTAPSFPTLDGYEAQRTFHDAKWMNTKEYSHVFNGGFAFEYSTENANSKSTSEFPFKKFGPQNYGLGYLTPEDCDDVDVKCSFKRFPNFDSLADAYK…
unitig_507	g5061	1181	unitig_507:151692-152873	SP(Sec/SPI)	GH5_14(85-373)	GH5	N	2	MIAFKALQVLTLALMALGISAEDIQYKIRRGETPSRAVNLGSWLVGEYWMSYHSPAWAGVPEDVARGGEYAAMKYLGHEKGDKQFDEHRRTWIQIDDIKEIKTRGLNTVRVPVGFWMLNDDSSNEPSEQGKVYAPNSLYYLDQLIKNWTVQHEVAVMLSLHAHQGSQNGFDHSGPVMIGDKKWFESDENVKTSLNLAAFLAKRYKDQPSFLGLNLMNEPNNNDKQPILEKYYVDAYTRIRDAGNDCIIVTSPMLGQQTPPFMDHFMLPTDHPVGRPDLLYTNVWHELHAYFIWGYEGRGDQDVINAAAGYKTGFIDAWHGNPLFIGEFCLDGPNNSSFADRNALVQFGKTQLETFSHAKAGWAFGAWRHDDEQTSTSGWSMRQLLREHMLTLA
unitig_507	g5062	1409	unitig_507:153593-155002	SP(Sec/SPI)	GH5_14(87-364)	GH5	N	2	MAFKRVLAVALCALGALTDAKITDHVQYKIRYGELAPRAVNLGGWLCAEYWMSYNSPLWKDVPKKVALNGEYATMQYLGQEKGTEAFESHWSTWITEEDIKTISKTGLNTVRVTTGFWIVNDEDDSKSSDVSKTYARGSLKYLDKLINVWGEKYNLAVMVSLHALEGSQNGMDHSAPAVSGTVGWGANESTIDSSIQFASFIADRYKDSPAFLGLNLMNEPNFPIPYDTLLPYYEKAYKKIRDAKNDCILVTSPLLYNQGPGAMDDYMPCPDYYNVWHEYHIYFKWGWENVAKDEIMRQAGTYRASHIDPWKGNPLFIGEWSLATPYESDLSDEDFAKFAAIQIKEYEAARAGWAFWAWRHDDEKNATSAWSMRQLLEKGIISIPKDAPVRTKEVDSKC…
unitig_507	g5063	1019	unitig_507:156316-157335	OTHER	GH5_14(35-313)	GH5	N	2	MSFTSPAWDGTNGHGWDGEYGTMQFLGREKGFAQFEQHRATWINETDIQAIAKAGLNTVRVPVGFWIVNDDSSTTANDITRVYAPGALKYLDRLINEWAVKYNLAVMLSLHAHQGSQNGYDHSAPQVLSTTSWSTSQANVDNSLQFATFLAARYKDSVAFLGMNLMNEPSYPTDYTVLLGYYKEAYRRIRATGNNCVLGVSPMLQEQGPPTMMDFMRWPDYVNVWHEFHVYYKWGYEGQNEQSILNAAKTYRGSHLDNWSGNWVFMGEWSLASPDSAPFSDRNLLKQFALVQMEQFKGARAGWSFWAWRHDDETKGLSPWCLRQLLREGILTVPKQVSR
unitig_507	g5064	2120	unitig_507:157820-159940	SP(Sec/SPI)	GH5_14(405-683)	GH5	GH5	3	MAPIQATLALCAAVASLFTPSQAFTASNASRLVSRRLADVTCTIEKDVDIKGNDIGNTPGASAQECCAKCGGTAGCGAFSWSSFNGGTCWFKSGKGTTVATSGVYSAVVAASSSGSCTIESGVDYVDNDIGSVAGASAQDCCSKCSSTSGCGAFSWNNFNGGTCWLKSGKGQTTTKSGVFSGTITASSTTCATVEQDVDYVGNDIGSVLSSASQSCCSICSKQAGCGAFSWSNFNGGTCWLKSSRGQTVKKAGVSSGTVSLASQCPTIENSVDYIGNDIGSVLATAATDCCAKCTQTSGCGAFSWTNFNGGTCWLKSGKGQSTTKAGVYSAAYTSSPSPSPSTHIQARIRSGEVRAISVNLGGWLVGEYWMSYTSPAWTGVGENGWKGEYGTMQFLGRE…
unitig_507	g5065	956	unitig_507:160060-161016	SP(Sec/SPI)	GH114(93-282)	GH114	N	2	MKLFTVTLVAALFGLSAACDGSSNNSTDVTKPPKTHRPPKTRTPKPSATTLTPGTSLPPSTTSPPASTPPSTTAPGAGTPVDGWWKPTPGTTYQIQLSGNLKTDYNVQMFDLDLFDTSADTIAKLKSKGVKVVCYFSAGTYEDWREDKSKFTKDMYGKNLPEWKGEYWVDTRNEKVREIVKTRMQLAKDKGCDGVDPDNVDGAFNDNGLGLTAATQLDFNRFLAETGHSLGLAVGLKNDLQQVDELSKVFDFAVNEQCAEYDECETLQPFIKLNKPVFGIEYNGNKKSVCAAANKLNMDTLFKSLDLLTERYSCRDQA
unitig_507	g5067	1634	unitig_507:163277-164911	SP(Sec/SPI)	GH30_1(90-536)	GH30	GH30_1	3	MMRSWSFLAVLALGFVANNNAVDAACNNFSNRFQKALEGVCVCTEASCDTVSNAYLTTPAAQLSVYTTSKAGDRLAPSTVAINTTKPTTSDFIIEPTVTYQKMIGFGGAFTDAAAINIYKLKTTSLQQKVLDAYYAESGLQYTVGRIPISSSDFSTSIYSYNPVVDDFDMKHFSIDVDRAPNSNKLDLIKRALSTTKRELSIFASSWAPPTWMTRDNSTLNCRVKGVPGEPYWKALALYYARFIEEYQKEGINIWGITVQNEPGKPIIQPSVWQSLRLTPEEERDFIKKDLGPLLKQKSPDIKIIAHDDQTADIPDRMAPFKDADALKYIDGIGIHWYKNLDFFFFGLGGDYGKLVDFHNKYPDVFILGTEACEGYLPSWLGTGVGVKLQQPEQIWYRA…
unitig_507	g5068	1634	unitig_507:165450-167084	SP(Sec/SPI)	GH30_1(90-536)	GH30	GH30_1	3	MMRSWSFLAVLALGFVANNNAVDAACNNFSNRFQKALEGVCVCTEASCDTVSNAYLTTPAAQLSVYTTSKAGDRLAPSTVAINTTKPTTSDFIIEPTVTYQKMIGFGGAFTDAAAINIYKLKTTSLQQKVLDAYYAKSGLQYTVARIPIASTDFSTSVYSYNPVVDDFDMKSFSIDVDRAPNSNKLNLIKRALSTTKRELSIFASSWAPPTWMTKENKTENCHVKGVPGEPYWKALALYYARFIEEYQKEGINIWGFTVQNEPGQPIIQPSAWQSLRLTPEEERDFIKKDLGPLLKQKFPNIKIIAMDDNKADIPDRMATFDDAEARKYIDGIGIHWYKNFDFFFFGLGGDYDKLANFHTKYPDIFILGTEACEGYLPAIIGTGVGVKLQEIDQIWYRA…
unitig_507	g5070	1634	unitig_507:173117-174751	SP(Sec/SPI)	GH30_1(90-536)	GH30	GH30_1	3	MLRSWSFLAVLALGFVANDNAVDAACNNFSTRFNKALNGVCVCTDASCDTVSNAYLTTPAAQLSVYTTSKAGDRLAPSTVAINTTKPTTSDFIIEPTVTYQKMIGFGGAFTDAAAINIYKLKTTSLQQKVLDAYYAKSGLQYTVARIPIASTDFSTSVYSYNPVVDDFDMKSFSIDVDRAPNSNKLNLIKRALSTTKRELSIFASSWAPPTWMTKENKTENCHVKGVPGEPYWKALALYYARFIEEYQKEGINIWGFTVQNEPGQPIIQPSAWQSLRLTPEEERDFIKKDLGPLLKQKFPNIKIIAMDDNKADIPDRMATFDDAEARKYIDGIGIHWYKNFDFFFFGLGGDYDKLANFHTKYPDIFILGTEACEGYLPAIIGTGVGVKLQEIDQIWYRA…
unitig_507	g5072	1634	unitig_507:177396-179030	SP(Sec/SPI)	GH30_1(90-536)	GH30	GH30_1	3	MLRSWSFLAVLALGFVANDNAVDAACNNFSTRFNKALNGVCVCTDASCDTVSNAYLTTPAAQLSVYTTSKAGDRLAPSTVAINTTKPTTSDFIIEPTVTYQKMIGFGGAFTDAAAINIYKLKTTSLQQKLLDAYYAESGLQYTVGRIPISSSDFSTSIYSYNPVVDDFDMKSFSIDVDRAPNSNKLNLIKRALSTTKRELSIFASSWAPPTWMTKENSTLNCHIKGVPGEPYWKALALYYARFIEEYQKEGIKIWGITVQNEPGKPIIQPSVWQSLRLTPEEERDFIKKDLGPLLKQKFPSIKIIAHDDQTADIPDRMAPFDDAEARKYIDGIGIHWYKNLDFFFFGLGGDYSKLVDFHTKYPDIFILGTEACEGYLPAIIGTGVGVKLQEIEQIWYRA…
unitig_507	g5073	1616	unitig_507:179505-181121	SP(Sec/SPI)	GH30_1(93-536)	GH30	GH30_1	3	MLRSWGFVTLLALVGLGHAHAAVAKTECTNYSAKFKKDLDGVCVCTEDDCDSVSNDYLSLKKGEVGVFSTSKGGDRLTYTARAVDSKAVAADFILDTATTYQKIIGFGGAFTDAAAINVYKLTPALQQAALDAYYSENGIEYTLGRIPISSTDFSESVYSYNPVVDDFEMENFSIDVDRAPNSHKLELIKRVLEMSSRDLTLFASSWSPPLWMTKENKTEDCHIKGSPGEKYWKALALYYTRFVEEYEKEGVNIWGLTVQNEPVKPIIQLKRWQSLRMSAEEERDFIKKDLGPLLKERFPDIKLISHDDQKPDLIDRLAVVKDDEARKYIDGVGVHWYKNLDFWFFGTGGDYDKLAEFHKKYPDLFILATEACEGSLPDWLGSGRGVKLNDYEKSWARG…
unitig_507	g5074	1751	unitig_507:181514-183265	SP(Sec/SPI)	GH30_1(86-540)	GH30	GH30_1	3	MLRPCVWAALLYVVVVANGAQSACSSWSKRYKQDIPGVCVCNATQCDDVSTEYLELSDRQAGLFQTPKAGDRLAYSTLDVETSSDSEADLIIDTSATYQQILGFGGAFTDATAINVYKMKEAVQQRIVDAYFSDKGLQYTIGRVPIASTDFSESVYSYNPVEDDFEMAHFSIAIDKSNETHKLEFLKRALGVSTREISLFASSWAPPPWMTRENQTENSHMKGVPGEKYWKALALYYSKFIDAYKAENVTFWAMTTQNEPIQQLLAIREWQSLRFTTQEERDFVKKDLGPLMKKNHPDLQIIIFDDQKDELLDWNASFIDAEAKEYVAGVGVHWYKNLDFLDEASGHFENLAAFHERHPDVFILPTEACEGYLVEGIGTGAGPKLLEANVTWQRGEIYA…
unitig_507	g5121	3788	unitig_507:266247-270035	OTHER	GT20(99-432)	GT20	GT20	3	MGEGSGHNLTISTSSSSASSSHFHHPNTNGSSGVTSPRNDFVVSQRTTDFEVSRVDSLSLEEQEIMANIQELQLHLMQLRAEQDEDSDDEPSTALIPGKSSSQLIVVSNSLPVILERVPQTGRWKATKTTGGLDKLMCLTGVRSDVNFLWVGWVGQHIPKHEHESVRRLLLQHNCLPVFLSSDVASKHSNFSSDVLWSLFHYVSEAPAADAATNPTYHASKPFSKQDWRAYESANESFADTIAEIYNEGDSVWIHDYHLMLLPSLLRQRIPPCHIGWFLHTPFPASEVYCRLPVRAELLRGVLQSDLVGFQTFDYERHFASTCERLLGVEFSHKGIRSTFGGVRDHFTSMGVFPIGISVEPFARAASSLPTLHRVNDLHRKFGTKRIILGVDRLDNIKG…
unitig_507	g5122	1501	unitig_507:270084-271585	SP(Sec/SPI)	GH18(191-383)	GH0	N	2	MLWTLVVCVLVSQSTRVAASRYDAGEDEDDEDADDTDGFDFLSTKLESIPKGVETAGSGACDVPGLVESVVKRGLVTPRPTIQSILQEHSRAASDVETRAFQGETLGYVTPWNNRGYDWAKQFRRKFTYIAPVWLQIREDSKTKTPIITGSHDIDDQWVADVRGGDGKGPKLVPRVVYERNRLNSNDVPVIIDLLVKLARERALDGFVFEIPIIPGTMDMLLRVGEALQDADKLLLLVLTRSSNEGALPVTHEMLIDLLPVVHRFTMNAYDYHLPGPNAPLDWIESTLEHFTDNEKPKILMGIPFYGYDGHDAIVGSSFAQTLKTHAGSRLQWDGSAHECLYRYTGDDEQRHVVYYPCLQFLADRLQLFQDHGVGVAVWELGQGLEYFYDLL
unitig_507	g5133	602	unitig_507:287402-288004	OTHER	AA6(3-197)	AA6	N	2	MTKIAIIYYSTYGHISKMAEAVKEGVELVTGVTATIYQVAETLPEEVLSKMHAAPKKDHPIATPDTLKEADGILFGFPTRFGSLPAQVKALFDACGGLWAAGSLVGKPAGVFFSTGTLGGGQETTAFTSVTFFAHHGMTFVPLGYRCPLLFNLDEIHGGSPWGAGTLAGGDGSRQPSKLELDVAKAQGESFASVAKKLSA
unitig_507	g5134	602	unitig_507:290425-291027	OTHER	AA6(4-197)	N	N	1	MTNIVIVYYSTFGHVVKFAVTIREGINKVEGVTATIYHIPETLSDDILSKMHAPPKVSYPIATPAVLKDADGIIFGFPTRFGSLPAQIRAFFDSTGGLWAAPGLESKPVGLFCSIGALGGGQETNAMTALPFFTNHGMMFVPLGYRSRLLSNLEEIHGGSPWGCSTIAGPDGSRTPSELELEIARVQGESFAEVTKKLAA
unitig_507	g5135	602	unitig_507:291495-292097	OTHER	AA6(3-197)	AA6	N	2	MAKVAIIYYSTYGHIATVAEAIKEGVEKAEGVTATIYQVPETLSEEVLGKLHAAPKKDHPVATADTLKEYDGILFGFPTRFGSQPAQVKAFFDSTGGLWATGGLVGKAAGIFFSTGTLGGGQETTAFSALPFFAHQGLTFVPLGYRSPLLFNLDEVHGGSPWGAGTLAGADGSRQPSKLELDVAKVQGESFAQVAKKLAA
unitig_507	g5136	602	unitig_507:292694-293296	OTHER	AA6(3-197)	AA6	N	2	MTKIAIVYYSNYGTLVKLAETLKEGIEKVPGVTASIYQIPETLSEDTLNKLESIPKADYPVVTFDDLKEADGVLFGIPTRFGIAAGQVSSFFSSTAGLWATGALVGKPAGIFFATGSLGGGQESTAYSTLPFLVHQGMIFVPLGYRAMSLMSLEEVHGGSPWGAGSLSGHHGARKPTALELDVAMTQGESFAKVTQKLAN
unitig_507	g5137	602	unitig_507:294770-295372	OTHER	AA6(3-197)	AA6	N	2	MTKIAIVYYSNYGTLVKLAETLKEGIEKVPGVTASIYQIPETLSEDTLNKLESIPKADYPVVTFDDLKEADGVLFGIPTRFGIAAGQVSSFFSSTAGLWATGALVGKPAGIFFATGSLGGGQESTAYSTLPFLVHQGMIFVPLGYRAMSLMSLEEVHGGSPWGAGSLSGHHGARKPTALELDVAMTQGESFAKVTQKLAN
unitig_507	g5138	2992	unitig_507:295965-298957	OTHER	AA6(260-454)	AA6	N	2	MSRLLSYQGVDPAWEERERSAFAKHSNRPGATVGQFLLGRFLEEDIHVSCKPMLPRDVVELNGKVLKGVCILQIVDVVNIGASFEHRTENSKGPSRTLKLCLTDGYQVISGFEYQWLPQLSVNTPRGSKVAIQNVAVRHGMLLLTPSTCQLVGSSGEPVEADKRKTKGATKDPTAGAYSAALLTTGSIGGPAIKPSGGTPQKASMDRDRPLFIATSGEQSPIIPLLPVNEDCAGPDSPKTSLQPQLTLQSTSKPPSIMTKVAIIYYSTYGHIVQMAEAVKEGVEKVEGVTATIYQVPETLPEDILTLIHAPAKKDYPIATPDTLKEYDGILFGFPTRFGSQPSQIKAFFDGCGGLWAAGALVGKPAGIFFSTGSLGSGQETTAYSALPFFAHQGMTYVP…
unitig_507	g5139	602	unitig_507:299362-299964	OTHER	AA6(3-197)	AA6	N	2	MAKVAIIYYSTYGHIATVAEAIKEGVEKAEGVTATIYQVPETLSEEVLGKLHAAPKKDHPVATADTLKEYDGILFGFPTRFGSQPAQVKAFFDSTGGLWATGALVGKTAGLFFSTGTLGGGQETTAYTALPFFAHQGLTYVPLGYRSPLLFNLEEVHGGSPWGAGTLAGADGSRQPSTLELDVAKVQGESFANVTKKLSA
unitig_507	g5140	602	unitig_507:301061-301663	OTHER	AA6(4-197)	AA6	N	2	MVNVAIVYYSTYGHIVKLAEAVKEGANKVEGVTATIYQVPETLSEDVLNKMHAPPKADYPIATPDTLKEADGILFGFPTRFGSQPAQVKSFFDSTGALWATGALVGKAAGLFFSTGSLGGGQETTAFSTLPFFAHQGLTFVPLGYRSPLLSNLKEVHGGSPWGAGVLAGADGSRQPSELELEVAKVQGESFARVAKKLAA
unitig_507	g5167	1598	unitig_507:382295-383893	SP(Sec/SPI)	GH1(52-518)	N	GH1	2	MLKTTYLAILAALVLGKPTFATYCDGGHDPVTPTPITPSLPPSDGDGGNSTTKCFPSGFMFGTATSAFQVEGGVNATGRTPSFWDAMCKSGSGLQCANVADDFVHRYKSDIQLLKADGYGAFRLSISWTRAMTWNNATGHMEANPEGLAYYHSVIDELLANRIEPVVTVFHWDVPLALYQLGDFLQASIIDHFVEYSDLVYREFGQKVKRWATINEPLSYMAILYTRSASDSDEYEAAHNLILAHAASVQRFRELQAGGTVLKDAQIGLVVDSFGIPMNASDPADVEAAERYNQFEVGWWMSPLATGDYPAVMRERVGSRLPTFTEQQAAVVKGSYDLLMFNFYGSSLITDCASASSQTNCSTLSAGHHADMGVDSSQFPPEAVRASGSTCSSRFGYAP…
unitig_507	g5193	1898	unitig_507:457891-459789	OTHER	GT19(31-455)	N	N	1	MLGRRVARPRVFLRGHGVRGVNGAATREKRVYLIAGEASGDAIGSQVISALQRLAANDPSTRFVFGGIGGQNMCKTGGFESLFPMQELSVMGLVEVLPYVFRFKRRLSDTVSDIKRFRPDLVLTIDSKGFTFRVLRALMDDPTTRDSILRMHCVAPSVWAYKHRQRKTNYDDLATLLHKMFVILPFEEAIFNGAKGGSWCEFVGHPAVEAFLEYHGAFDEKNPQQMGTDGSDGLVVEAGGLLDLSKYGSDILARQGAVLRQLMTKKRDVNSRKKLRERLNLPHDAFVICGLVGSRQNEVHKTLSTVLAAVKHLQESSPSQKITLVLPTISAVRSLIEQKVAALPFSFSDSVHILVDCNTSTRFDLFNAADAAVAVSGTIVMETALNSLPTVVIYRANRL…
unitig_507	g5215	1937	unitig_507:502979-504916	SP(Sec/SPI)	GH30_1(88-539)	GH30	GH30_1	3	MLSPRVLTLSVALTALWTHSASSACSSYSSRYQKNLEGVCVCTATDCDEVTSEYKTLAGDSVGVFQTSKQGDRLSYTTVNASPTSNDAANIELDSSTTYQSIIGFGGAFTDSVAINVYSTNEALQKRILDAYFSENGLQYTLGRVPIGSTDFSESIYSYNPVVDDFAMEHFSIDVDKSPKSNKIALIKRALSTSSREIKLFASSWAPPVWMLRENKTENSHVKGEPGEPYWKAMALYYSKFFDAYKGEGINFWAMTTQNEPTEQALSFKQWQSLRFNADEERDFIKKDLGPLMKQNHPDLKIISYDDQKDVINRWTAPFNDPEARKYISGVGVHWYKNVDFVADFLGYFEELTKFHTANPDLFILATEACEGYLLEGVGTGAGTKLLQPETIWTRAEIY…
unitig_507	g5278	2978	unitig_507:658147-661125	SP(Sec/SPI)	GH31(366-861)	GH31	GH31	3	MLSGIGSVRLAQILFAIGCLTAQAQELIKQDDGSGLLTMLFKQPLWPETNIHYNAFNGEGWTGVPGYAMQKSSQGGNYSATDGWWEYSLKTSQLEFVFNDNNGLWDNNDNQNYKVNSAGTWALVSKITEAPKPPPPTYISGAGYAVTGVEETGNKITLQLLANPTSEPEQFGADIKELVVDITKLEDSVRVKITDKNAKRWEVPLDLYSKGGLSKESGSGGQGQQGQGNTKSNLEVTYTKNPFTVKVARKSDGYVLFDSSKLDLVFKDQYLQIGTDVQSDLNVYGLGESTRGSMRLSPGEKHTMWARDQGSMDKNLNTYSSHPFYLGLNGQGKAHGVFLLNSNGMDVTLEDGRLIYQVIGGILDFHIISGPTPSDVVTQYTSLIGRPKMMPYWSYGWHQ…
unitig_507	g5279	2975	unitig_507:662470-665445	SP(Sec/SPI)	GH31(365-860)	GH31	GH31	3	MLSGIGSVRLAQILFVIGCLTAHAQDLVKEDDGFGIVTVLYKQPLWPETNFHFNNHSLGWTAIPGYAMQKSSYGGNYSAADGWWEYSLKSSQLEFCFNDNNGIWDTNDHQNYKVNSAGTWALVSKSTEVPAPLPPTHISGAGYAVIGVEETGNKITLQLLANPTSEPEQFGADIKELVVDITKLEDSVRVKITDKNAKRWEVPLDLYSKGGLSKESGSGGQGQQGQGNTKSNLEVTYTKNPFTVKVARKSDGYVLFDSSKLDLVFKDQYLQIGTDVQSDLNVYGLGESTRGSMRLSPGEKHTMWARDQGSFDRNVNTYSSHPFYLGLNGQGKAHGVFLLNSNGMDVTLEDGRLIYQVIGGILDFHIISGPTPSDVVTQYTSLIGRPKMMPYWSYGWHQC…
unitig_507	g5280	2990	unitig_507:666452-669442	SP(Sec/SPI)	GH31(364-860)	GH31	GH31	3	MTLSGLGNIRLGLQLVALGCVLTSAQQLVQHDDGSGVVRILFQHSASDPNIHYSADGKDWTGTTGVPMTRSLLEGEYSAANGWYQHEVPASQVKFVFNSEGKWHRSLWGEAYEVTSPGTYVVDSKEVASTVATTDAGYVNTTGYKVTKVQKGNGRFALELALNDGNVDATYGASIKELTVDVSQSGENAVRVKIADKNAKRWEVPRDLYTKGDLGKAGTAQWGGSFTGSGSNLDFSYTEKPFTFKVTRKSDGYVLFDTSKLSLVLKDQYLQISTAVKSDLSIFGLGESTRDSLKINPGDKHTLWARDQFSNERINNVYGSHPFYLGLNDKGKAHGVLLLNSNGMDVTLEKDQLVYQTIGGILDFYFVAGPTPVDVVAQYTSLIGRPKLQPYWAYGFHQC…
unitig_507	g5283	902	unitig_507:677040-677942	OTHER	GH31(1-169)	GH31	N	2	MIGADICGFIGNSNLELCARWAALGAFYPFARNHNNNDAIPQELYVWPEVAAVGRKFLGMRYRLLPYFYTLGYQAHLSGLPIARPLFVEFPDDANTHEGIAVERQYMLGGALLVTPVVFQGATSITGYVPAGTWYNLFDYSRLNSTGQDAVWQVKLDDMPVHIRGGSILPLHQSGALTTQAARATPFDILVALASDNKASGQLYLDDGEDIEGVSKSTVVEFRVDSGKLTSKVGLNGYKDAKTKNVSKIVVLGVSSAPKGVTVNQGKPLQDFKYDGEKQVLEIDLKEKFNIAQALTVTWN
unitig_507	g5284	2012	unitig_507:678000-680012	SP(Sec/SPI)	GH31(370-670)	GH31	GH31	3	MVASGVGRVTQLLVAVGCFAAAQAQELIKKDDGSGVLTMLFQQPLWATPNIHFNDFKGNGWTAVPGFAMNKSSYSDDFAAANGWWQYNFENTSQLEFVFNDNNGTWDNNESRNYVAYSAGVWAVVSNIEPAKPPPPAFINGTGYTVTSVEETGNHITLQLLANPTTEPEQFGADVKELVVDITKKEDSVRVKITDKNTKRWEVPLDLYSKGDLSKDSGNGGQGQQGQQGQQGNAKSNLDVMYTKNPFTVKVTRKSDGYVLFDSSKLDLVFKDQYLQIATAVPTDLSVYGLGESTRGSMRLYPGDRHTMWARDQASSGEKINTYGSHPFFLGLNGKGKAHGVFLLNSNGMDVALEDGRLIYQVIGGILDFHVISGPKPVDVVNQYTSLIGRPKLMPYWSY…
unitig_507	g5419	1827	unitig_507:1033963-1035790	OTHER	GT50(129-397)	GT50	GT50	3	MTEGTRYSVVFGGALAIRLVLLAYGAFQDEYLPVKYTDVDYDVYTDAAREVANGNSPFDRTTYRYTPILAYLLLPNIYVHEIFGKLLFVAADLLVGHLLMRILQLRGLTETRALHYVCIWLFHPFSINISTRGNADSIVVLLVILSLLLIMQKKAVLSAIAYGAAVHFKIYPIVYALAFLVLLSGDFNVSNAKWSTSCQSSFCFWVQLAGQLNRDRVVFGLVSGGLFLSLIGIFYHLYGYQFLYEAYLYHFTRTDNRHNFSVYFYDLYLRYNTPSGFGVGLLAFLPQLTTLITISVVYGRDLSFALFALTMVFVIFNKVCTAQYFLWYTVFFPLILPTTKLRFRWEGAALIGAWFASELHWLFWAFHLEMKGQNTFLPLWISGLLFFSVNVGVLSTLMR…
unitig_507	g5521	1103	unitig_507:1240351-1241454	OTHER	GH5_14(65-344)	GH5	GH5	3	MSSLQERLRRGEIPCRGTNLGGWLVAEHWMTSNSVIWQDVPSDISSQGEYATMSFLGHAKGDERFERHRATWITESDIAEIKRFGLNTVRVPVGFWIMGYDPTDVSNKQEWKVFAPNALKFLDRLVNEWCVTHDLAVLIDIHGAKGSQNGRDHSAPPTSGVKYWSDYPENVENTVQLAAFLANRYQNSPAFLGIGLLNEPEYPVNPQIVRDYYYRAYHAIRSMGNDCVVVTAPMLTEQFPPVMDDLMQYPECYNVWHEWHPYFIWGYEGQNEKQVLQAVRSYADQLKGWQGNWILISEWSLGAQASAFPAEDRKRLKQFADAQLESFSHAHSGWTFWSWKHSDDEQNRPTGWSLRQLLRDGVMRVAP
unitig_507	g5562	1451	unitig_507:1325887-1327338	SP(Sec/SPI)	GH72(21-325)	GH72	GH72	3	MKLLALLSGLLLGLTVPMVTAATNPIVIKNYKMYDSVTGKYFGVRGVDYYPRANTGTKYDVNNYDFFTDDHEDIWGPDIQYLADLGANAVRLYAVNPSLSHDKFMAALSAKGMYALVDLGANCKNCAITRDAAPTCYPSQLKSRGEMIIGAFAKYDNVLAFSAGNEVNHVVDDPNTNAPCQKKFIRDMRKYIDSCTSMRKIPVGVVLADTNRDANALYYNCRTDTSDTYENAEWYGINVYVHCDGAVTDVSNAAGFNQLLSDFTTYKMNIPVMLTEFGCLSNSFATVNEYEAQRTWLQAGWLHSKKYRAMFNGGFVFEYSTENANSKADAPYPFTKFGGQNYGLGYYSPATCDHDTVKCVYKTMPNYGFLQTQYKATNYDDEPLMSSFVADANKKDFPS…
unitig_507	g5689	1748	unitig_507:1658017-1659765	SP(Sec/SPI)	GH1(26-509)	GH1	GH1	3	MRLGLSLATLAASCAVAVSATASEQRCFPDNFLFGSATAAYQVEGGWNDTGRTPSIWDDFCRERPGKQCANVADDFVHRYKSDIQLMADTGLSSFRFSVSWSRVMTWDSETKHMKPNPAGIAFYHDVIDELRRKNIVPIVTLYHWDLPSALHKELEPQGWLNSDIKEHFVEYAELMFREYGSKVDYWSTFNEPWTSSYKGYGSGAEAPGLSHSKKNSYIAAHNVLRSHGYAVQKFRALKNEDVIHSGARIGIVLNVDYAYPLNASDPSDVAAAERKMHFGLGWFLTPIVSGDYPVVMRERAGENLPTFTPEDEVVVKDSYDLFMLNHYSSKAVVDCKSPLSTVKCSDQSLGWEADLGIDESRLPEGARPSSTDRDGNRLCTWFTGYPKGYLETIRWTHK…
unitig_507	g5690	1748	unitig_507:1661288-1663036	SP(Sec/SPI)	GH1(26-509)	GH1	GH1	3	MRHGLSLATLAASCAVAVSATASEQRCFPDNFLFGSATAAYQVEGGWNDTGRTPSIWDDFCRERPGKQCANVADDFVHRYKSDIQLMADTGLSSFRFSVSWSRVMTWDSETKHMKPNPAGIAFYHDVIDELRRKNIVPIVTLYHWDLPSALHKELEPQGWLNSDIKEHFVEYAELMFREYGSKVDYWSTFNEPWSFSYMGYGSGRLAPGFTHSKSNAYVVAHNVLRSHGYAVQKFRALKNEDVIHPNARISIVLNVDYAYPLNASDPNDVAAAERKMHFGLGWFLTPIVSGDYPVVMRERAGENLPTFTPEDEAVVKDSYDLFMLNHYYSKAVVDCKSPLSAVKCSDLSLGWEADLGIDESRLPPDARREGTDREGNYLCPDFNGYPKGYLETIRWTHK…
unitig_507	g5707	1778	unitig_507:1706926-1708704	SP(Sec/SPI)	GH1(26-509)	GH1	GH1	3	MRLALALVAGLTSWVIGVHAAAPEQRCFPDKFLFGSATAAYQVEGGWNETGRTPSIWDDFCRHKRGLECSNVADDFIHRYKSDIQLMADTGLSSFRFSVSWSRVMNWDPESERMKPNPPGIAFYHAVIDEIRRQNIVPIMTLYHWDLPSELHKKLEPQGWLNSDIKDHFVEYAELMFREYGSKVDYWSTFNEPWTFTSKGYGTGDHAPGWKHSKENAYTAAHNVLLSHGYAVQKFRLLKQQDVIHPNARIGIVLNADFGYPLNASDPHDVAAADRKMQFGLGWFLSPIVSGEYPEVMRERAGKHLPTFTEEEVAVVKDSYDLFMLNHYSSKTVVDCKSPHSHVKCSKQSLGWEADLGIDDTRLPEGARPSSTDEDGNYLCTWFTGYPKGYLDTIRWMHK…
unitig_53	g10378	1658	unitig_53:100576-102234	SP(Sec/SPI)	GH6(52-297)	N	N	1	MLRGFTKAILTTALLAVARNGFTLVNAAEELCALPTSSLVAAASEFPDCTLALDEVKKQAIATWYTDRETTDSYTQKAKDIVAQCPESSRITLVVYGLPNKDCDAGYSSGGVNKNADDYKKWVQDLATTVGDRKVLYVLEPDAVGLIAKGGCGVQNGYAGNVKEAIRILSANANADIYLDVGYWTLMSATDAAGVASTVKDLAQGGRIKGITLNTSNYRSNKEISDLCSNFQNAYGDKSLKCIADTSRNYKDPTSSEWCNAKFGGVGRPPTSNTGFDNLDYFIWIKPPGESDGTCDGGEHTGDSMKGPGAGLFFKEHFVSLWNNGYFVNEKKMPVIDGTIQQPITPSPTTPAPTPAVTTVTPTPTTTAPTSQVTPAPTTQVTPAPSTAAPVVTTPAPVV…
unitig_53	g10379	1484	unitig_53:103077-104561	SP(Sec/SPI)	GH6(39-294)	GH6	N	2	MWRTRSLMMAAAVALVASLKGVVAEELCSVAPGTYAQAKINYPEAAFAIAELEKHGIATWYTDREGAGDYVATAKQIVAQCPSSSRLSIVVYGLPDKDCEAGESRIGTRNKNSGMYQEFVSQLQQAVGDRKVLYVVEPDAVGLLASGGCATQLGYKENVATAISTLSKNPNADIYLDVGHWMLSSPSDLSNVASIVRSLMTAGRIKGISINTSNYRSNSELSSLCGNFRNAMSGTDLKCIIDTSRNYNGPSSQNEWCNYKGAGIGKVPTSDTGDANIAYYVWIKPPGESDGSCAGRSSDAMVSTSAGGFFLDYFKAVWNAGSLVKDLGMPKIDGTIRDVPSTTTPASSATPSPSNSSNSSSPAPSASPENGVVGSSTGSKAVGSTGSSFMDMSTKSVGV…
unitig_53	g10380	1292	unitig_53:104972-106264	SP(Sec/SPI)	GH6(46-294)	GH6	N	2	MKALLIVSLTFAGTILMPLAQADDAKLCSIPPSTYPLAKIDYPDYAFAIEQLENLGTATWYTDREIDGDFVGVAERLVEACDNSTRLTAVVYGLPNKDCEAGYSSGGNVTNAAEYEAFISSLADVVGDRKALFILEPDAVGLLGNGVDSCAEKFGYRANLKTAIQHLSANPNADIYVDVGFWRLADPGQAAHIAEIVRDISNAGRVKGITLNTSNYQGTNAMVQMCNNFQTAYGSKDLGCIIDTSRNYNAYNGSEWCNVRSGGIGHPPTSKTGIDNIDYFVWVKPPGESDGECDGDDHTSDAMVGPEAGLFFPEEFELLWDQGYFVQEEGMATLRVDEAKKSGSNTSAGVIVVICLVVVGTVLACGFWFLRRRRAQLEKPLGTNFKAIITPTPHRDSLR…
unitig_53	g10381	1154	unitig_53:107342-108496	SP(Sec/SPI)	GH6(39-296)	GH6	N	2	MKTVVRATAFLALCALWASDYARADDAALCSISPSTYASAKTEYPKYKVAIEQLENRGIATWYTDREGSDEHTKVAKRLIEACDDSTRLTTVVYGLPNKDCEAGYSSDGGNKDSEEYETFISSLADIVGDRKALYILEPDAVGLLGNGEDSCAEKYGYRDNLKSAIRILSKNLNADIYLDVGFWRLANSVKADAIAKIVRNITSAGRVKGITLNTSNYRGTRDMVQMCTNFQTAYGSKDLGCIIDTSRNYNAYTGEEWCNVRSGGIGHPPTSKTGIDNIDYFVWVKPPGESDGECDGDGHTSDAMVGPSAGSFFAKEFELLWDQGYFVKEEGMASVGSKSGVSTGAIVGICFGVVAGIVLVVGGIWFKRRQSSRPIGTNFAAVA
unitig_53	g10382	1226	unitig_53:109086-110312	SP(Sec/SPI)	GH6(47-294)	GH6	N	2	MRGLFTASLVFSVLWTPQYATADDAALCSIPPSTYAGAKLQFPQFQFAIEQLEHRGTATWYTDREINGEHVKVAERLVEACDNSTRLTAVIYGLPNKDCEAGYSSGGNNTNSTQYEAFVSALAEVVGDRKALYILEPDAVGLLGSGPDSCAEKFGYRDNLKRAIRILAKNPNADIYLDVGFWRLADPVKADAIAKIVRNITSAGRVKGITLNTSNYQGTNAMVQMCNNFQTAYGSKDLGCIIDTSRNYNAYNGSEWCNVRSGGIGHPPTSKTGIDNIDYFVWVKPPGESDGECDGDDHTSDAMVGPEAGLFFPEEFELLWDQGYFVQEEGMPSFGSDDSSSQSAGVIVATCLAVVVVVVVGGIWFKCHRFSPSNTEKPVSPAFTTIVTTPRRNSLRSLG…
unitig_53	g10472	728	unitig_53:316713-317441	OTHER	GT4(58-209)	N	N	1	MELANLMPERLDVDVLIAPSHFALHHPSVARSVTARSRHVMFTGVDTTLFAPSTNIFRSEVFTIGYVGRLSTEKSVGVLLSVAKLLVDRGIPCRVRIIGDGSQRERLKALTASWNLSSIVTFTAAIYDPPRLAEEFQRLDVYVSPCFEETLGIAPLEAMSCGVPVVGFATGGVGEFLEDGVNGIAIKEPTAEAMTEAIMLLYQNSLRQRLGAQARQTVEHRFSDRRGIQQYLALYERLRKPR
unitig_53	g10500	1908	unitig_53:418904-420812	SP(Sec/SPI)	GT1(135-472)	N	N	1	MQWKVSVWTVMMLSVLVLLMKTTIASAEAVADAFPLASAVQSELYIVLVSIPVLDKVLPLKNLAEELLHRGYRVGFALPENCWHWVSDLEHHEFISLGNIVGKGRATYSDHQELQTLGVYESYATTLRYYASFQRPMFNALVEDLEEDRPDLLVVDRYTFAGFDAAQRLDIPFVVNNPSLLTDIDSPPAYVGAPFSNISMHTPSAWERCLNSFYRLRFRLAMVQVFKEVNQNRRDQQLPPVESKEELYGGTLVLTNSMFGLDEPRPIAPQFQMIGMLQSPHHRPTPPLPIDFEYWLATNPLNKPVIFISFPSNIPLAPEFVTTLMDGLDNIGARVVWRITLQEQAAFDLRSRSRASVFFLGDDVDETLVLEQTPVSLLITAGDLHTMQQALVVGVPILG…
unitig_53	g10509	788	unitig_53:438918-439706	SP(Sec/SPI)	PL3_2(32-229)	PL3	N	2	MVQLTSILCAAILAAPALVSGAELPTGSWPASKGTVQLTAPQVVKAGTTFDGGMKTYERKGVTCTGQAEGGKSDAVFLVEAGATLKNVIIGKNQIEGVHCEQHDCTIQNVWWDDVCEDALSIKNGKASSVSRVLGGGARYADDKIIQQNGPGKVVIDGFYAQDFGKLYRSCGNCKTQYERHVEVSNVLAVNPKKAVTMINTNLGDTATISNLHLTSSKSDKTVCVWSKGVTSGEPSETGYGPSKSCIYTAKDVILSKRLLRA
unitig_53	g10510	788	unitig_53:441079-441867	SP(Sec/SPI)	PL3_2(32-229)	PL3	N	2	MVQLTSILCAAILAAPALVSGAELPTGSWPASKGTVQLTAPQVVKAGTTFDGGMKTYERKGVTCTGQAEGGKSDAVFLVEAGATLKNVIIGKNQIEGVHCEQHDCTIQNVWWDDVCEDALSIKNGKASSVSRVLGGGARYADDKIIQQNGPGKVVIDGFYAQDFGKLYRSCGNCKTQYERHVEVSNVLAVNPKKAVTMINTNLGDTATISNLHLTSSKSDKTVCVWSKGVTSGEPSETGYGPSKSCIYTAKDVILSKRLLRA
unitig_53	g10518	815	unitig_53:455303-456118	SP(Sec/SPI)	PL3_2(32-229)	PL3	N	2	MVQLTNVLCAALIAAPALVSGAALPTGSWPASKGTVQLTAPQVVKAGTTFDGGMKTYERKGVTCTSQAEGGKADAVFLVEPGATLKNVIIGKNQIEGVHCEQHDCTIQNVWWDDVCEDALSIKNGKASSVSRVLGGGARYADDKIIQQNGPGKVVIDGFYAQDFGKLYRSCGNCKTQYKRHVEVSNVLAVNPKKAVTMINTNLGDTATISNLHVQSSKGDKTVCVWSKGVTKGEPSETGYGPSKSCIYTAKDVFLNEKGYNFSDLKRSLRA
unitig_53	g10519	788	unitig_53:457289-458077	SP(Sec/SPI)	PL3_2(32-229)	PL3	N	2	MVQLTNVLCAALIAAPALVSGAALPTGSWPASKGTVQLTAPQVVKAGTTFDGGMKTYERKGVTCTGQAEGGKADAVFLVEAGATLKNVIIGKNQIEGVHCEQHDCTIQNVWWDDVCEDALSIKNGKASSVSRVLGGGARYADDKIIQQNGPGKVVIDGFYAQDFGKLYRSCGNCKTQYKRHVEVSNVLAVNPKKAVTMINTNLGDTATISNLHVQSSKGDKTVCVWSKGVTKGEPSETGYGPSKSCIYTAKDVVLSKRLLRA
unitig_53	g10520	1902	unitig_53:458448-460350	OTHER	PL3_2(222-419)	PL3	N	2	MTSSLRQKTTALSPLCISTTMDPIYPTGVLVSPHAVCAGSTETPRKLKYPPAFDLSRGNNDEPDSDNQEEDALSEDGHGESTPYTLKCHDWVRRACFSPRPKGQHPPRRQLRSCSWSSSDPKDSNKAVKRGDSFRCSNQQQPSALERIQEDEDSDEEAYDSDEESEEQLQLYKSLSGNLFVNRRAVEDEDNDTLTTVLSVALLAAPALVTGAALPTGAWPASKGSVRLSAPQVVKAGTTFDGGMKTYERSNVKCQGQVEGGKADAVFLVEPGATLKNVIIGKDQMEGVHCEQHDCTIQNVWWDDVCEDALSIKNGKASSVSRVLGGGARYADDKIIQQNGPGKVVIDGFYAQDFGKLYRSCGNCKTQYKRHVEVSNVLAVNPKKAVTMINTNLGDTATI…
unitig_57	g11756	1643	unitig_57:104869-106512	SP(Sec/SPI)	GH5_20(50-335)	N	N	1	MWVSRVAFAVFAALAVSLSSVDAKRACRHANYIARDGKILAVDPVNPTVETEISIKGVAWSGMEKPEMIPEGLGGTEEVNARGIENTKVSTLLEFLSNNTFNSVRLPLNAQYVINDPTPQLSYIHAYENREFTVWEDPKSVKYFDLIGRVVETLQNKKITVLLDIHLIDKYSEDVYWYTPPFVNITESPTYKAVSYLASALCNETFWNIIGIDLKDAMLDAQWSANEGDAEEKSDWKSAAEVLANRVVDLCPQWLVFVGGAASPTDAQRFSVGKDYAPSNHWSGGNLKNATARPIEMAEENKLVYAPQAHSHGRFPQNYFYTADSNCSASAMEAFTLERDGAKDECVDFIDGKKVKSKNGCNFQGFGCLKYKHLEKSALVGNYKKVLNEALGGVVAQKD…
unitig_57	g11757	5080	unitig_57:108877-113957	OTHER	GH5_20(441-721)	N	N	1	MTQWQWFTVAFVASISSVPVSYCISLLIGFPVPFSLVVNASIGYPMMIGLLWLFWHKTVRDNPHLKANLYRQVLVPMGQMMMMFAFPLYFFFFKLLPPLGQSVFTVLIPIIKLGIKNYFNVTLKDVDDIKAAFVVFNIDLFSALYVANCLQASQSKTNLAIVMAVDVAQPAVAMYELRRVMMQIRSLVRLNEFNGTLLDLCTVISGKPAAQAEPKSSVRPSRVHAVSAPPEDPPVPTVDRSLTVPDLKPGDATLLLPKIGAVLYMVEFYLLIEFAEVMIPIVYCIYMIVMSNLPNRAYYSQLTALTNEEMLQSITTVILNAGLEMVSFIVILWLIHRTIQLPTPHLLAFALEKEPVASSPGLSSGFSISSSSPWIIQPMVVIILQSPASSAMWVRRVVF…
unitig_57	g11762	1647	unitig_57:127375-129022	SP(Sec/SPI)	GH5_20(50-336)	N	N	1	MWMRRMALAVFAAMAASTPNADAKNECRHPNYIARDGKILAVDPKNPTVETEITIKGVAWTGMEKDSMIPDGLGGTTESNDKGIENTKVATLLEFLTNNTFNSVRLPLNAMYMNSDSFPQLGYIHGCENRELTVWDDPNNVKYLDLVGRVVEALSENKITVLLDIHLIDVASEDEYWYTPPFTNVTESATYKAVSHLASTLCNSSFWNIIGVDLKDAMTQVQWNGKDEDAEEQNDWKNAAEALANRVVDLCPQWLVFVGGAASPTDAQRFSVGEDYAPSDHWSGGNLKNATARPIKMAVENKLVYAPQAHSHGRFPQNYFYTADSNCSKKALDTFELEGDGTNDECVDFIEGNKTRSKIGCAPQGFGCLNYKHLEKTELVANYKKVLDEALSEVVTQKK…
unitig_59	g12857	860	unitig_59:28483-29343	SP(Sec/SPI)	CE1(48-214)	N	N	1	MVSKSTFFSGLLIALTGLCGIQAAPTTSPGCAQPASIISGKYDVTVDGQQRRYIVRVPEGYDHKKPSRVVMAFHWYGGSMEAIELESTELGNGSYFGLKAFGGDSTIFVAPQGLAYGWANINNDDLAFVDAIIKTLDNGLCMDTSQRFAVGLNYGGSLVYDIANSRANTFRAAAILSGSVANTYTGKTGAISLYVQHGMSEPGNPITEARTIRDRFVEANGCASQTAKEPAPGSGTHIKTEYKDCSSGKVVTFVAFDGGYQYAPVDAGSKTSWSGEEIWKFFMNSP
unitig_59	g13073	1469	unitig_59:526047-527516	OTHER	GT71(76-381)	N	N	1	MMPTRSYGHAKRRRHVRYGELALPLPTLMEGILLLMMLAMVLLLGNLLSLRVVSQTRQNVARTLWDLADARAVEPRGIVLPLFDGVALMGMSLVMDLRALHADLPIEVPHCGDLSAHFRDELEQNEEWNVRVYDVCVEAAQAAEHSTFGTPKPLFCDSLEHCHERFRNFDIKILALLFSRFREVMMLDADVLFFQDPTLLWDLDKYHQTGTLFFHDRISFTDEFLAERIKGKPERSRLHEFIERFDRTPFQVLAAVPRPTESAQDAMAHGHQQPRAALLRDSTKYAPSEFLRQSHSWNLRAGHQSDSSVLLWNKHKQPRATAILASFVTLRHSFRPPSYGDKEFYFLACEVAESDYSFSDYGVGSIGWDAKHDESMLCGDALHFFPVRGDKVKTDDDVS…
unitig_59	g13102	2435	unitig_59:587632-590067	OTHER	GT74(5-366)+GT2_Glycos_transf_2(397-517)	N	GT2	2	MTSPRVHIISFSMDRVFQLSEYLRTLHAYVTLDGQRISEEPQWARITIICRCSTPAIRTYYEQVAAEYPNVAFLYEDEATTRDFAECLLECLGLEDTSIEQATQEATSSASASTPCPYVLLNVDDAFFFDDIDLAKAIQFLDATDGTEPVMKTCTTSGESTAESLPLWNFAFHLKLAPSIWRSHMSNQPMLPLPPMATVLPPGLDAVSMALSAEESDRLFLTFDPARGVLDWSYPWELSGSVYRYDTIARVISAIQTQFGRQGISRPNHLELRGHQIVHGQWMNQTHRLRCACLPRPKMHVFAINQVQDIYDNRLYTTERRSMDDPRGSNEFLGSSAGDLGHLLRLYETQETLDESYYRRHRFSSVHIGTLVLASAANQARVRGSVDWTADHMPLVSVV…
unitig_65	g11997	1290	unitig_65:74897-76187	OTHER	GT62(126-358)	GT62	N	2	MILHLMQKDVPPILDTTQAIALEKSSVESEMPVTTTAEPERITKVKKLNKAQVKTKKPKRGLASSVLHPRTTSMPPRGATPFSLLGYREPIKGGPNVYETTEIIPQHGSDEVDVHYQLRNDAILSSVASDAEDFTLIVVVTNDEKSWGLNRSAHDFFELLDTFTHPKEMTSVTLLTSSMSEFDKLQKLIQGRIQDYTQLSLLYRTDFSVSKVTRENRHDVSLQRVRRRMLTRYRNYALLTTLESWHQHVVWLDSDVIVVPPDLVSKMIEADRDILTPLCKICGKNNRVREYDLNAWAGSRTTPESSSDREDLFPGPLNVTHIRDFQNGADDFIPLDSVGGTMLYVRADVHRQGVLFPHHFVIGSEWTQEGYDGIETEGLCYSAHFLGYRCWGMPHEVIY…
unitig_65	g11998	1309	unitig_65:76789-78098	OTHER	GT62(132-360)	GT62	N	2	MRLPTTDAVHKHPRKTPAIVLGFLALFSVSVGLTLWSAGFGFNNVRGGAPPRPSVSIEPDESLVEFIGKSVLHPRTAPLPRANSVPFEVEDFRKPFSDQTRETTETFPLYGSNKRGIHYRLDNDAIIQDGAHDMVLIVLVYNDEKSWGETRSVEDFFDLIATFTHPPEKTAVTMLTSSKKEFDKVQSIMKEKIPAYAQFSLLYRNDLDTGSKLTRENRHDQGVQNVRRRMLARYRNYALLSTLETWHQHVVWLDADVYSVPSELVSKMIKADRDILEPICVIRDRDSDHDREYDFNAWVGTRTQPKSAKERNGFVPNPLDINRISDFSNKPHEYIALDSVGGTMLYVRADIHRQGVLFPHHYVIGSEWNAEGYDGIETEGLCYSAHFLGFRCWGMPHEV…
unitig_65	g12000	3131	unitig_65:81864-84995	OTHER	GT62(130-337)+GT62(496-720)	GT62	N	2	MSLLKTRVHPSARALQRSPVMFGFFALFIVTAGLSVWQLTRQPLVQIQKEDVVDLSYLKIHKNDHIGKSVLHPRAAELPNVESEPFDLHQYRETLVATIRETTETFPQYGSAERGIHYRLDNDGIIKQGAHDMVLIVVVFNDEKSWGGGRSPKDFFNLLATFTHPTEKTSVTMLTSNRTEFNKVQRIMKEKIPEYAQLSLLLRNDFNVGSVVTRENRHNDGIQHVRRRMISRYRNFALMSTLESWHQHVVWLDADVHTIPNGLVSKMVKANRDILEPVCLQGGREYDMNAWVGTRTHPKSTQERNGFVPNELDVDRISFFSNTTHDYIALDSVGGTMLEWDMEGYDGIETEGLCYSAHFLGFRCWAAMSLPVTKAPARLTPLQRSPVVLGLFAAFVVTA…
unitig_65	g12038	1688	unitig_65:190439-192127	OTHER	GH5_14(249-532)	GH5	N	2	MEHEKTTVVATGASSTTVSAHAEASESFSASTTTTTTHHSTTTISGSSSSTVEVSSSSIEVQGSSEEHSSFSAQGSISGAIAGTASGQATHVEVTEGPGWAASSISITASEDGNTAKTEKTQGPGWEASSISITAGEDSSSTSKEKTQGFTNQAGQIQGGTCTSATTDKPAPAPAPATPAPAQPRVHVQKRIRAGELGARGVNLGGWLVAEQWMSAGSDMWKDVPEGFQGEYQVLVHGNDKEARIAKFEQHHATFITEADIAAIAKAGFNLVRVPVGYWIAGSDDGVDEKYGNLDEWKAFPKNAATYLDKLVKEWAVTHNVAVLVDIHAAKGSQNGDQHSAPTVNGQAYWGQYPENVITTINVVKFLADRYKNDEAFLGLGLLNDPAAQTDEKVLHQYH…
unitig_65	g12039	31020	unitig_65:192933-223953	OTHER	GH5_14(196-476)+GH5_14(659-939)+GH5_14(1122-1402)+GH5_14(1585-1865)+GH5_14(5552-5835)+GH5_14(6053-6336)+GH5_14(6554-6837)+GH5_14(7055-7338)+GH5_14(7556-7839)+GH5_14(8057-8340)+GH5_14(8558-8841)+GH5_14(9059-9323)+GH5_14(9522-9798)+GH5_14(9935-10219)	GH5	GH5	3	MGGTASAEEEAAAAAAATKQVETTTVTTTQQEEEEDDELAHVSFEESVSVETDGTDATTVTTVTKVTTIVTADGQEVVTTETTTTKDVVEGQLKMEQQLELKPVDSFVSAATTLSATSSFADTTTSTTTITTTHVQQLIRDGEIAVRGVNLGGWLVAEKWMTREAEMWRDLPREIEGEYQALASGIQTKQRLTDFEHHHESFVTERDIALIAKAGLNTVRVPVGYWIAGGDKVDPSGKAEWAVFPKRTVVYLDKLIKKWAVMHNIAVLVDIHAAKGSQNGDQHSAPTVTGQAYWSQYPENVQNTIDLAKFLGDRYKDEPAFLGIGLLNDPAANTDEKVLLQYYEDAYKAVRASGNDCVLTVMPMRWKQDAESLVGFMEAPKYTNVWVEWHPYFIWGHED…
unitig_65	g12040	1247	unitig_65:225698-226945	SP(Sec/SPI)	GH5_14(107-387)	GH5	N	2	MLKRLTWCTALVATVTAVAAGGACGQGANETGPGHVKPAGGPDHIQRRIRAGEVPVRGANLGGWLVSEKWMTAEADIWKGVPKELEGGGEFVALTQASDPATRLSSFKYHHDSFVTEKDIEDIAKAGLNTVRVPVGYWIVGQDPYDTSKNGDWSKYPKDTVKYLDVLIKDWAVKHNVAVLVSIHGAKGSQNGADHSAPVEPGKCYWSKFKENVDNTINMAKFLGDRYKDEVAFLGIGLLNEPNGDTDEKVLNQYYEDAYKAVRASGNDCILTIMPLLYKQDAENLNGFMEAPAYKNVWVEWHPYFIWGYAGQEADEIVSKSISKDFQEKLNKWNNRPNSNKLFFGEWSLANTGQFPNGDSPDFERWTQAQSTVMDQAKGGWTYWSWRLYGDETGFNAWS…
unitig_65	g12041	1007	unitig_65:228124-229131	OTHER	GH5_14(13-234)	N	N	1	MDVPAEIDTLIRDWALKYNVAVLLSVHGAKGSQSGNDHSAPTVKGKAFWSDYPENVNSTIYVSKFLADRYKDDAAFLGIELLNEPTSTTNESVMTNYYERAYHAIRDSGNDCVLTVMPLLYKQKPESLKTFMEGPKYSNVWLEWHPYFIWGYQNSRATELLDQVIPTEYRNKMHEWLGQNSTKKMFFGEWSLANAGQFKRANAESFEKYATAQVKIMDTATAGWAYWSWRVEGDDYFNGWSMRSVLRDEPLRKIVMQ
unitig_65	g12042	1337	unitig_65:230300-231637	SP(Sec/SPI)	GH5_14(137-418)	GH5	N	2	MFVRLLKAVGICAALVATLAAAECDDEYVNPAVQKGYSFDDLVNTTTPSQKPSTAPSPVPSSVGSATPPASGHVQAKIRAGEVKSRGVNLGGWLVTEKWMNAGSDIWNDVPAQYSGGGEYVTMKHGSNVDDRRKRFTKHHDTFIMENDIREIAEAGLNTVRVPVGYWITGADPSDISNKGEWKAYPQGTLAYVDRLIREWGVKHNVAVMISIHAAKGSQNGQDHSAPAEPGKAYWSKYQENVDNTLYVAKFLADRYKDDAAFLGLCLLNEPNADTSESVVNQYYQDAYKAIRDTGNDCILSIMPMLYKQTAENLNGFMEAPKYTNVWVEWHPYFLWGYEDVSADDLVNKSILQTFDAKIKKWVNRAGANKMFFGEWSLGNAGQYKNADSDGYKKWTQAQ…
unitig_65	g12043	1241	unitig_65:232069-233310	SP(Sec/SPI)	GH5_14(105-385)	GH5	N	2	MLARLAFLAAAAFGLANADSYSFDAINNDTESVLVAAAPADHIQAKIRSGEVKSRGVNLGGWLVTEQWMTKEASFWYNLDEQYANKGEYVALANGADHDKRVAELENHHKTFVMEKDIEEIAKAGLNTVRVPIGFWITGEDPFDTSRQGVASVFPKDTLDRVDTLIRDWAYKHNIAVLISIHAAKGSQNGADHSSPTNPGTTYWSDYQENIDNTVYVAKFLADRYKNDAAFLGLGLLNEPSGKTDEGKLNEYYKRAYKEIRGTGNNCILAIMPLLFKQNADNLVGFMEKPEFTNVWVEWHPYFIWGYENWSAGDLLNNGIKRDFYNKMKEWNNRPNSNPMFFGEWSLASAGQYNNPDDGAFEEWTKAQMEGMNMAKGGWTYWSWRLYGDENGFNGWSMR…
unitig_65	g12118	1343	unitig_65:360388-361731	SP(Sec/SPI)	CE13(85-321)	N	N	1	MVSYRSLLTSFFATTLLSTAQAYQPGDQICSYSAGTSCPIDTLKASDTDGSVLIYPGGNTRCAFDDYTDPKTGYTTNSTFFFQVFPKPERKKLLLMFQGGGACVDSNTCNFALQCSLGTSRTFAPAAAAASTGIFNRSDPNNLFKDWNVVHIPYCTGDLHIGSKVLEGVDTGFEGLFNQTQCMNQKKKMHMNGFENSKAALAWAKANYPDVEELVLSGMSAGALAVQALALYVGDLWNVNSGRVHYGIVPDSYMGILPAERTPGSVLNFYGTCGLDLKLPSSFVDSCKANTTTMIDVVTTTLKTLPQTPWFFINSKGDRTQRYFYQIAKDGILGYPFTNLLPPADLYAAMNKLIDAYKSASSRVSSLFVEGEQHVFLRGATYYDTVGDAGQKLGDFLSQ…
unitig_65	g12125	1355	unitig_65:371567-372922	SP(Sec/SPI)	CE13(80-257)	N	N	1	MVSYRALLTSFVASTLLSVTQAYRPGDQICSYSAGTTCPVDSLKLSTTDGSVLIYPGGNTRCAFDDFADAKSGFKTNSTYFFQVFPKPKREKLLLMFQGGGACIDSYTCNFALQCALGNGRTFTTVATASSTGVFNSSDPKNLFNDWNIVHIPYCTGDLHIGNKVLDGADTGLEALFNQPQCTNLGKKMHLNGFENTKAALAWAKANYPQVDDLVISGMSAGSLAAQALAVYVGDMWKVQSGSVRYAVLADSYMGVLPAERTAGNVINFYGTCDLDLKLPSSVVDSCQAKTTTIDEMVTAPLKLLPQSDWVFINSKGDQTQRYFYQVAKDGVFGYPFANILSEADLYTGMSKLVDAYKAVSSHVSSYFVNGEQHVFLLGNKYYDTVSDAGQKLGDFLAQ…
unitig_65	g12144	3484	unitig_65:415074-418558	OTHER	GT2_Cellulose_synt(817-1082)	GT2	GT2	3	MEAVDIIAAVLELICGLSLAFGGWSALSLGARSLFTTTQFISGFGIGFSAAYTAIVTLSDSTNEWIAFGAACGAGVLIGAIIGFVTSLGSYILLLATGALIAPYLLLIDAHDGVEVFPEDNQLARQEFVVAFMIIFLLVWSSRSKTSELENHRFKYILFSSIVGGWMLADGVSRFVGDGTLSSVLFNSFQKGGKAALEDIDGSAQLLMFLVWGGVFLIGTINQICMRWGLICYNRVGAHASLGPIEENLPEIPTGATLAAQTSTEKVRLVCENCFATVPAGTAFCTECGEAMPSEDADPNISISQAQMPSVAMNSQTMAPERWQPVPHRAYVSTTSFVDPKLAMQSNAKGDGRSIRFMDGGVQDPDGKLRGYNDSMARPNNFYEPSFRSFAMSTYSIAN…
unitig_65	g12154	3788	unitig_65:441671-445459	SP(Sec/SPI)	GH81(82-766)	GH81	GH81	3	MRTSFLRCVRAGVAFCGLLLAQTHAVATNEQQLPLPFPVADHPLTLATTLFDATQPLYKDAVNADQRNATSITTENPQFLGDVPFPTGAWWTNLVLDKGDMAVVSMPYVFKVIDGKLRVSYPFRVVMPHVIQNGFLSQLVVSSVPVTAKTTTSPLQHQVVGFDTFAVTVRFARPETKGDGEFLVHLVRGSPYVTMEYKNTVPVIESMDGLLLTRLKRFTEEENLDSEGEQLPFATYAIQLSNNQVWYVFASDPSINLQLVHGKVVADDAYTGVLRIALSLTADSLPHLLDSAAVYPVGGNVKYALDSSIMDTDVVSLEFHWKTQQFANMTSKKPLLMLTLPHHVDMLVDPEASTIETLRYTSIRGMMTGILGDVWKMRESLPTLDWDYPDQGLFDKQLD…
unitig_65	g12205	2816	unitig_65:573004-575820	SP(Sec/SPI)	GH141(441-680)	N	N	1	MASPARLALISCWFLVFEALGNAAAPAIDLYISPSGSDNAPNDGTLSLPFKTLTRAQQEIRTRKAALGAKPSPPFTIFLRQGRYELDATLEFSAVDGGDSADTPITYQAFCDPAVEAAQQSVEPYPYASHLATPPRLLWNGVGDRAAWKGPVDPFYQMGIDRAKNSLLIAPTPAPPIANMDIGPLCVDKVGQGHTCYTGTLAMCVAGCQDSCTRHLERKMYSAAFYSEFSHLFGKNLEKEEDCIEICSQSCRACEDVTISGSKRFQPTTWTLDRTITTAVNSVTTTLSVFSTDLSTYLPATPHFIEQTDPPTVFSTLYFNGVQLPRAGYPNCVVQSTPSTALTPFTCTFATPSVSSKRGVLAFDPTKFSARVAQWTEASVASMVVELRPNRSSHANLLY…
unitig_65	g12220	3845	unitig_65:615290-619135	SP(Sec/SPI)	GH19(81-316)+GH19(337-536)+GH19(560-771)+GH19(806-1035)+GH19(1056-1270)	GH19	N	2	MRLHLLVLWLVALTLAVVSARRLEVDDEDRPGMVRVAAMADDGSDDKAEDEGAGSTEEEEEGSNENDEASTSKYSDNGYLNDIMTEKAFATLFPRAHRLYNYRALTLAASKLFNGAFLANASNTEENPDARKRELAAFLAHVAVETSDLQVVQRVRAGDDEDEEGGASTGAATGVDASSDQALYCDRTYASCGRGKSYHGRGPLLLQGNDMYARCSKAIGRRDLLVVNPDLLATDPELTWSCAIWYWMKDDGLGSLHDAAIDLSLGLPRTTALFKQGLECGAQALKKEGDGARVAKYKALAQTLMLAVNDSEVLSCTVNSAPTEVKKMDVADLPLAQLLSKDVFQSLFNDSIALYSYDMLLEAGLSYPEFAATADDDDANKAEVAAFLAHVSLRTNGLT…
unitig_65	g12234	1208	unitig_65:638897-640105	SP(Sec/SPI)	GH17(46-302)	N	N	1	MNTRRVLQTAAAALAASMTAAQDVQLYGINYNTRQGPDWAPPAEKCKTKAQIEQELTTLAKIAEVVRIYSIGDCDQAAQVLPIAKQVGLKVELGLWVNNDTAVFKAEKEQFTKLVTGSGLVTSDLVVGIHVGSEAVYRKEITAAQNIDYMKEIKSIVKDKSLSIPVTIADIGDVYLAHPELIDAVDFVSANAFPFWERIEVSRAASYFLERMTPLFNLATEKNKPIVISETGWASHGQNPNASIASPDNAATYFHDISTLATALNWSLYYFEAFDESWKLAHDANNTVEAHFGLFHANGTLKAEYETYFPMGKETAVASSSTDASSVAMPALTSVAPSGPPSSMPPVICRAMRDPK
unitig_65	g12235	1624	unitig_65:640484-642108	SP(Sec/SPI)	GH17(46-302)	N	N	1	MVRVMPTALLASAAALATAVQALDFHCYGINYNIRNGPDWAPAETKCKKADLIQQELVKLKTVTDIIRLYSLTDCDQGNIVIPAAIKAGLKIELGLWVGPEQATFNAEKDAFQKVVANKDLVNNKNIVGVHVGSEAVYRGDVEPATAIKYLDEIRKISKAAGLDVPHTIADVGDMYLDYPELIEAVDYVSANMFPFWEKIDVEEAVDYFYTRIQDLETAAKAENKSVVIGETGWPSSGVNVNASDASPAAAALYFQDFYNMAHQHDFKYYYFAGFDEAWKGTDPENTVEAHFGIFDASGKLKTEFETLKLNDKTPAPSSKTPAPSSKAPGKDTPAPTSKTPGKNTPAPTKDGDASDDDDTPAPSSKTPGKMTPAPTTKTPGKATPAPTSGKGDDDDDNT…
unitig_66	g12362	2213	unitig_66:263610-265823	SP(Sec/SPI)	GH5_14(437-715)	GH5	N	2	MVQIGSAVLALGLLGLVEANKFNHAPHRNGTHGHHHRQLVATCSLEAAGIDYVGNDIGSVIAGAASECCAKCSAVSGCRAFSWNDYNGGTCWLKSGKGATITTSGVQSGTVAQNTDDGKCTLLANLDYSGNDAGSATSASAGDCCSKCAARSGCKAYTWTPWNGGTCWFKSAVGNLAGYAGAYAGVVNPTNTPSPTPTTPAPTTPAPTTPAPTTRTPAPTPTTKPPSPGKCNVEQDVDYSGADVKSVKGSAGDCCEACSLTNGCGAYTWTDFEGGTCWLKRSKGAANANSGAVSGVLPQEDRCTLEQGVDYIGLDVGSANSESADGCCSLCSSRSGCGAFTWSSGVCYFKSHRGQTKANADVVSGVVTVANRPQTHVQYRIRSGEIPAKSVNLGSWLVG…
unitig_66	g12543	1271	unitig_66:686630-687901	SP(Sec/SPI)	GH71(25-399)	GH71	GH71	3	MKAFLAFLTLTLASAASAVAAQKMVFAHHVAGVAADLTPDNWVSDMKLAKEFYIDGFALNIGNNDPNNDKIINNAFDAADKVGFKIFFSFDYATHGAFPPATVIDLINRYKGRPSYYLLDGRPYVSTFEGPGSANDWISIKGATNCYFVPDWSSLGPEGIKAHLDKIDGAFNWNAWPDGPNSLHTDGDDLWRNALGGKHYLMGVSPWFYTNLPQWNKNWLWRGDNLWHYRWEDIIKFQPSMVEIITWNDFGESHYIGPLYEKSFPQGAGYCKDMPHQAWLKTLPNYIARYKGIDVPKGNDKVVFWYRPTYGKACASGATTGNNIAYQKGFQPFEVQQEKVYVTVILDAAAEVAVQIGSAPEKVYKSDKAGLFHFDSEKGGAMGPVNIIVRRDGKEIKKV…
unitig_67	g12584	1931	unitig_67:91603-93534	SP(Sec/SPI)	GT71(254-513)	N	N	1	MRTMRARSLRWRGRRGLATLLLLIMVILSFALVSLPVRGEVETTDADDMDPSDEPDEPETTQGNMLVLSQNDLIEASVPSSSLPDLDGVDTTSVAYHRKEYERLKILRTNLLRDLVEKEALVHELEAQVKQAVLDIESEHTKLLKPMPSPRGIMRSLSCLGWKKTSQCQWTGRRNAALDQSCFALVPGGSAGYCEIKDDDTGDFYYVMRANCTSIPPNVMHWCQVAPQFANFPVEIEGIMALLEPPVRTTVTTRGIVMVVRSSQIERAFAHIQLLRSLGCMLPVELWYFKKERQSTFSGDLGAKAQEERESHEARIQLLGSKVQELNEAMGGAATVTTRVLDTASTQRQLPYAKIEAIAQSDFLEVLYIDVEAVTLKNPTYLFDREEFRSTGAIFWPDL…
unitig_67	g12585	2231	unitig_67:93739-95970	OTHER	GT71(369-597)	N	N	1	MLATHASYRSPSDSPHRRSSGTPLASRLRFLLVVCAVLYVLGLWMWSPSSTPRTMKTMRAAEPPVVEHKVPSDVIEVVQPILVDAQADRRPEPAPMAIPTPSTVENVERIPDDPLDFIPEVTKVAVVTNPADVSTPEAAAQARPEPEVTPIASSAIPAAPIASVSPTSTPESTTALPTPSSTASLLLSLDEATLNMMTARARYRELQMKRLEAIQAVHAVKREIERIKEQMQVHAKVIADDDAKSVLHLSSDYKRQSHQRRFRCLGWRATEGCDPNGKRQPELDRSCLQIVPAERSGYCEIEDRDTGERFRVMKISCDTMRWDSRLRCFEAYDFPNFAIQSVEVVKNATLAAPPTPEVLEPAAVEKSKRGIAIVVYPKLLPSAYATLRTLRRQNCTLPV…
unitig_67	g12599	1283	unitig_67:126119-127402	SP(Sec/SPI)	GH6(47-301)	GH6	N	2	MRLSSAVSLVSASLALTSVSFVASAEEVMPICNVWKGYTYEKAKADYPDLTDSINIVQQHGFVPWYTDNSPQQGLDVIIEALQSKCPEKSKIPMVIYGLPKKDCVANYSNMGFNKNLDDYKAFLQRLNDAFPKQHMIYIVEPDAIGLTVNGGCSVDNDYKGAVKVALEMLSANPNAELYLDIGFWALLDSGKPDMLAQIVNEIWPKDGGKLKGIALNVSNYEKTEEMIALCEKFAKLTGRNGMKCIIDTSRNYRGPSATHEWCNAKGAGIGHPPTMDTGNAQAAYFLWVKTPGESDGECTNEKSGEATVGPRAGDFFKDYFQMLWQNGYFVDKKQTSPSSAPAPTTAKPTSAPAPAPVVTLGTETPAPAPAPVVTVATVAPAPVPSSGSGSFLYCGPAR…
unitig_67	g12600	1256	unitig_67:127715-128971	SP(Sec/SPI)	GH6(37-293)	N	N	1	MRLDVVLSALMTALLASSVNAMAFCSAYRGGYNYETAKTTYPELADRINTVQDQGLTPWYTDNSPKDSLEKVITNLSSKCGTNTKIPMVVYGIPNKDCEAGYSNLGFNKNFDDYKAFIQRLNKEFPNQHMIYIVEPDALGLLVNGGCAVKHEYKKYVQYVLETLSTNPNAELYLDIGSWIISGNPDAAAKVVNEVWPKNSKLKGISLNVSNYKKTDDMLALCDQFATRTGRKDMKCIVDTSRNYRETPNGQWCNVKGAGLGVPPTQNTGKARAAYYMWVKTPGLSDGECTHENREQSMLGPRAGNFFKEYFEMLWKNGYLADKKATPSPPPKPAKPTETPAPEPSTAKPTETPAPSSAEPTSAPEPSTSSPAVAKTTMTTDSYVYCGTHPDKLALNAWC…
unitig_67	g12686	1418	unitig_67:303157-304575	OTHER	GH1(6-469)	GH1	GH1	3	MAQELRFPDNFIWGTATASYQIEGATDEGGRGDSIWDAFARTPGKVINMDTGARADDHYHRYKEDVQHMKSMGLKNYRFSIAWPRIIPAGVGAVNEEGVAFYNNLINELLANGIEPLITLYHWDLPLALQTEYDGWLGGEFIQNAFVEYARVCFDRFGDRVKRWLTFNEPYCATYFSYGTGIHAPGRKHKGSTEAYIAAHNMLLAHAKAVDLYRKEFQPRQNGAVGITLVSEWREPAAATDPQEQKRNAEAAERAVLFMVGWFADPVYLGDYPQVMKDCCGDRLPSFTDDEKKLLKGSSDFFGLNHYSTFYTRPSKAYLQGVKNETTDITLDEGAVFTSDPSWEKTEMGWNVVPWGLEKILLWVQNRYNCAGGIYITENGCAVADKTKEDAMNDDFRVN…
unitig_67	g12716	1046	unitig_67:359982-361028	SP(Sec/SPI)	GH6(34-291)	GH6	N	2	MRFTAGILSAILAISMVKAEMPICGAWKGASYEAAKTQYPELKDAIDVVQQYGSVPWYTDNQGVADQQKVIDTLKGCDPNTKIPIVVYGIPNKDCEANYSNKGINKSEQDYQAFIVRLTAAFPSQNMIYIVEPDAMGLLADSKCAQDNMYGDRVRYAINELSKNPSAELYLDVGYWTLANDAQRKKIVDAVNAVWTPGSKLKGIALNTSNYQKTEKILELCDKFATESGRSDAKCIVDTSRNHKGPTSANEWCNANNAGIGQPPTMQTGNARAAYYLWVKPPGESDGTCTEQKSGESMIGPDAGHFFKEHFDLLWKNSYFVEKGETKPKPQTTGIGFDMLGQNATTRV
unitig_67	g12725	899	unitig_67:389314-390213	OTHER	GH6(15-256)	N	N	1	MPRTSTRRSSLHSSKYGTVPWYKDEYSVHDQLRVIDTLAKGCGPNTKIPLVIYGIPNKDCEAGYSNNGLNKNKKDYQAFINRLSAGSPTQNMIYIIESDAMALFVGSKCAQDNKYGERVKYAIKELSKNKNAELYIDVGYWTLMDPVKLVSITKAVNDVAGTSANVKGIALNTANYRKTEEMLDLCGKFVTGSGRTGAKCIIDTSRNHKGPTSKNEWCNARSTGIGVPPTVMPKDPRAAYYLWVKPPGESDGTCTKQTSGESLVGPKAGTFFAKHFAMLWNNGYPVEAAQKAKQKALRS
unitig_67	g12795	2164	unitig_67:559715-561879	OTHER	GT71(225-455)	N	GT71	2	MTDKRKQRVQLDPSSSRRTGLGHAWSEHNTRHEQWQDITRMVDSDVESGAAKAPLPAPRRARVTQIVVILFALCVVGVAFIATEFEFLPTLSEKIRRPLVGFWEDKTSPIHQYECVGWRPTKGCTPDGEVSAKLSCNTVIKGRSSGYCELRHRRTGVTRKVLKMHCDSVKPDVKLKCADYQTLLGYGHLVSSYIHDSDFSFKTNQQKFLLENNVTTAIEPAAIARGIVFVVYDRLLPGAYASIRNLRAKGCTLPIELWSRPGEIRDDHPILRELVANHGAYRRIIHDKHATGYFTKLHAVFYSAFDSVLLLDADNFPVRDPEYLFETAEFRDTGALFWPDYRRPARRGDWDIIDNSILWEVLDMPYVDMFEQESGQVMINRHRHERALNALMFFGFHHP…
unitig_67	g12796	1424	unitig_67:562086-563510	OTHER	GH1(6-471)	GH1	GH1	3	MAQELHFPEGFIWGTATASYQIEGASEEGGRGDSIWDAFSRTPGKVVNKDTGAVADDHYHRYKEDVQLMKNMGLKFYRLSIAWPRIIPAGVGEVNEEGVAFYNRLIDELKANGIEPLVTLYHWDLPLALQTEHDGWLGGEFIQDAFTKYARVCFERFGDRVKHWLTLNEPWCSAFLGYGIGVHAPGRKRNGHVECYQSAHNLLLAHARAVDVYRKEFKDAQGGRIGITLNCDWREPAPTSDPQQLKRNEDAAERSLQFNLAWYADPVYFGDYPQVMKDRIGSRLPVFTDDEKKLLKGSSDFFGLNHYGSAYTAPSKEYLSGEEPTEANRGFGFDEGVEISADDAWLRTDMGWNVVPWGFEKLLLWIQKRYNPANGILVTENGCAVADKTKEDAQNDDFR…
unitig_68	g13192	1363	unitig_68:161633-162996	OTHER	CBM9(37-213)	N	N	1	MTKRNEEWQYMDTLRPPVYVCLRRKADSNGVVPRLKIDGRVDKEEWSHVPWSDAFVDIEGVVKKPTVYPLTRMKMMYDDQHLYIAAELVEKQIWGTILEKNATMYHENDFEVFLNPDGSRHNYYELELNCLNTIWELVLNKPYKDGYSIKNPYNLEHVQTAVYVDGVTNDPQVECTKWSVEVCYRLSELVQFDRLRERPARAGDVWRVNFSRVQYQLMTVLDEETNELQYAKVPDTREDNIVWAPTGVIDIHRPEKWGFVLFSSASDEHEGILELNKAMETFLCEQIAMEQILDTIYYDQRTFHATHENYAESLEELYGKTEAFPRLDLVEEFELSQPVIERQSDPDATPVYTPRGVETSKKRVYSPRLDPDDEEDARKPPLCRFYTVSIKSATQRWIM…
unitig_68	g13273	1997	unitig_68:366280-368277	OTHER	CE10(346-627)	N	N	1	MVASHDVPELIPLNVLFGNADKRMPRLSPDGKYYAYLADAENGVTNIFLKPVQWESATSSTLVDTSTAQQLTNETHRPLRHFEWAKSVEPRRILYIQDTDGDEDFHLHVVEFHVDEELHGVDSIQLRDLTPFGAVTVSAIELSDNFPNAVIAAVNKRDPRFFDAYKIDLSTGDCELVVENPGDVNQWLVNDAFEVVGGFAMDAASGSQQLRVKDAQDETQWKTLVEWPHGETCHIHTVAEDGKSVFVETSLSHGDGAETNTSRLVRLSLEDGSVVEVLAQDDKSDVSKVSFRAKTQTVRYVTFDYTKPRVHIIDEYIRADLEHLISQCTGEFELVSDSEDGLTWLYADSPDNASVKYYIFDRRTRRQALLFDSRPELAKYSLVEMTPHVIKTSDDEDMV…
unitig_6	g7421	2889	unitig_6:42072-44961	OTHER	GT20(63-529)	GT20	GT20	3	MMTTTAEAVTPPTATPSGASDIGESSLLDQLHDLHKKLAAVRQDSQRFNAMSRNMGPIPMASETNKIIVVSVRRCVRMTKTSHDDSWQYIPSDTGFKSAIDYLCGTNNVQWVSWPGAVVDESSQDGVRRKLETDFNCRPVFLNNEILDSYYNQFCNVILWPLFHSLPQRSDSRLLENFVEKYDAYCTANQKFLEAISEIYKDGDLVLVCDYHLMNLPGLLRRRFPDITCGFYFHSPFPSSEFFQMLPAREALLHGVLGADLVVFNHFDYVRHFLNVCTRMLGLESSPSRIEYNGRLISLGICPMGIDPRKYEITPSVLKQVELLKQQQDEMKIIVGVHKLDFCKGIPEMLEAMEYLLQHYPEYRGKVVLFAVVRDVGRMAAHQYKMLNRQINELVGRVN…
unitig_6	g7468	1566	unitig_6:144429-145995	SP(Sec/SPI)	GH17(45-302)	N	N	1	MVRILASAALALAASAGLAATTDASKCHGINYSNRAGPDWAPAETKCKSPELIKQELATLKKVTDIIRIYSLSDCDQANAVVPAAVEAGLKVELGLWVDKYHNETYPAEKAAFEELLKNKDVVNKETIVGVHVGSEAILRDDLPVQTLIGYMKEIKEICTEELDVPVTITDVAESYYNNKQLYDVVDFVSANIFPFWDRIPIDKAVNQFLGKYQKLTAASKGKEVIIGETGWPWAGHSNRGSPTSPENAAQYFSEFTTMAEKKKIKYFYFASFDEDFKIQQLNDTKTVEAHFGLFHKNGTLKDSIESLKVFSFEDKETPVPSPVPSPTPSVSKEPTSPVPSKGETDKTPAPSKGATDKTPAPSKTDDSDDDSTDVDTPVQKLTPAPSKGGSSPTPAPTK…
unitig_6	g7534	2669	unitig_6:300151-302820	SP(Sec/SPI)	GH63(597-887)	GH63	GH63	3	MAATVITVVIALLAVIAALWTTQDGSGWLQRLTTSKAPSPASSEPQETFPPLDFEALREYTRANSLNAFRWGTYRSGFYYGLRSRSYPYAVSAGLLWSSSHEDISQLRHECRQEDRLQKYGWLQHDGRTYGMQSIEDQFNRVELKTYYQRVNQGQATDGWASRISVLPLEPRDERLKRKKVDQTKLSLFYYVDLGCGDETVTHPCRSKLQGLLDVVAEPTTQTCGGDDIFSCTTLTFQSEGLNDAEDAPLEFLVQAQLKTRVGASIKKAELRYGSLKDAGVVNIKERLVASAERPTPQEDAEVVLDNIIEEGTSVVVIQVIVEFDAAENVVQEGDITLDVVMNEGSTTTPDQLATQIAQLDETLAASETSFQQKFEDAFQLSTKGFNSSEIAFAQAAFG…
unitig_6	g7660	491	unitig_6:585422-585913	SP(Sec/SPI)	PL3_2(34-163)	PL3	N	2	MARFTSLLCATVAFTAPTLFTHAVSVPNGTWPTSQGTVELTAPQVVKAGTTFGGGMKTYERKGFTCTGQAEGGKSDAVFLVEPGATLKNVIIGKNQIEGVHCEEHDCTIENVWWDDVCEDALSIKNGKATSVSKIIGGGARNAEDKVIQHNGPGKVTVDGFFA
unitig_6	g7857	1475	unitig_6:1062300-1063775	OTHER	GT71(105-398)	N	N	1	MRNRLRTMLLPLTTRHGATGPTAVTRRTQWTVLLSLVALAVMSMAMLSSVTSLTSLSTLRHPAPTPTPTLAAREEALKKREQRRRWTTYQAEQLSRISQRATQPRGIVMPLFDKIAFLGFSLILELRAMHVDLPIEIPHCGDLDPHLQRKLQENDAQVRIYDVCQEALTYSVRDNDERKLFCRNMNECRRRFRGFDIKIVALLLSRFDEVMMLDADALFFASPMRLWESPKYIETGTLFFHDRVSCDHEFLAARRRPNGANMTHLQEYLTYFDVEPFQKFATVPRPKATSTPARHFSLPFSPSEFLVTSHSWNDRAGHQADSSVMLWNKKRQQRATAILASFIALNGIGRPPSYGDKEFYFISCELAESNYAFSDYGVGAIGLDARDKDKDGQAVLCGD…
unitig_6	g7858	1457	unitig_6:1063887-1065344	OTHER	GT71(87-365)	N	N	1	MGLLEYERRWSQRRQAGRPMRPALSRRVLWMVLMGMAGAFVLFVNAVFVQLQASERALRASASLLETNELLAERLWRVATAESTVKRGIVLPLFDDIATLGVSLVLELRAMGVHLPVEVPHCGDLSAKYYDKLLEEDKDVRVYDVCELATTKHAPLFCVDLEDCHSLFRSFNIKVLAVILSKFQEVMVLDADTLFFQNPMTLWSIPKYTATGTLFFHDRISYEQSYLAKRVDGRERVSRMHVFLSSFDVSPYRRLAALPRASSPLTRLSPFNFSFTPSAFLMKSHSWSLRAGHQMDSSLVLWNKLRQPRATAILASFIARTGLPPPPSYGDKEYYFLACELAETAYSFSEHAVGTIGTQLSPAKKLNDKLVLCGDALHFYPEPTDSRDQEPRVLYINSD…
unitig_6	g7899	1493	unitig_6:1191533-1193026	OTHER	GT71(150-380)	N	N	1	MAVLTTLMGCFVSCFVTLWLWIRFQDRVSVVVPWGKTEEQCWAPYPETPWDVDEFECLEWVATDEDGTPTGETRECWQRVRGGEAGFCRIRNVSSANIFHVMHTTRLSLKDEVRFTCGLAKAFTEFRHLAKDYTHDPPMLLPQGELESIGIVMAVYDQVLASAYASIRQLRSTGCQLPIELWFRHDELKKENTVIHQLMTLFGPIKLRVIHDDRIRGFYVKVHAVYYSSFTSVLLLDADNFVVQSPTPLFSSATFQAHGAVFWPDFWHPGNTIFNIHAQSLLWELLGIEYVDMMEQESGQVLINRQKSRVALEKLMFLATNHPNLLRKLKLVWGDKDLFRLAWFLARKTFYFNDRRVPGALGVINHDRQRFCGMSMVQYDLDGQSILFVHRNTIKLTGQ…
unitig_6	g7930	1445	unitig_6:1277442-1278887	OTHER	GT76(8-397)	N	N	1	MAERSIARFAVASRAVLSVLAACTALIVTPYDTSGRIISEHRVWNAFANWDGVYYTLIAQHGYDYENVHAFFPLYPLIVRFMSRLLPLDNATSTLVSGWFLSNASFVLAAVYLYRLGCLVLKEERTARRAAYLFCVAPSSIFMTAAYSESLMCLLSFAGMYYLESYRVHGRGWSLLGSAVLFGAASATRSNGALLSLFIAWYRLRASPHPFKNPARFLAYWFTTALLGVIAIGPQVIYFLQAIYVYCPSIAGSTGSPYLESDRPWCASAIPNISAIYMFVQREYWNVGLFRYYEWKQLPNFLLAAPILTLSFVSLGSFVLLPQQEHSAAPYYAHWAFLVVNALLVVHIQVTTRLLAACPPLFWAPAVFIKPSHVVVAYFLLYSVLGVGLFSSFYPWT
unitig_72	g13796	1271	unitig_72:480643-481914	SP(Sec/SPI)	GH17(25-280)	N	N	1	MISAKYFTAIALLAALAEAGPLPSGVCYSPWHHDSVNNDVVQKDLTQIKEYFSSFRSYHAAFGQVNVVDAAAQAGVKVALGIQMQDAGKIDAEITAACEGAKRHPGSVAAIYVGNENLQNNGFGTFSAGQLVNYINQLKGCTAGLNIPIGSVQRINEWISAPGAAELAAACDKVGVNIYPFFTPGDKAPIEKFKDQVAQVKEKYGEKVDVTETGWPRQGATVSGNSPSQTGTQTFFNDYAEWSKSHPNSYYFMMYDTKVSYSGADYEKFFGLADTNGQLQVQIPVGNGPAPTEAPTPAPTQAPTQAPTPAPTQAPTPAPTPAPTPAPTPAPSTPVQTNPVQTSVPTPAPTTRVPETGGDATPAPSSPKVTPAPSTPKVTPHPSKPTDDGDSDDYSDDTP…
unitig_72	g13808	1715	unitig_72:512549-514264	SP(Sec/SPI)	GH17(56-297)	N	N	1	MRFAGVLSSVLALTAQVVTAALPAGVCYSPFHSQDYYMQPSKIQSLLTRDLKEIAQSFSYVRTYHSQFYGTNIIDAVQEAGLKVAIGIQMLSPSGEPYAYLDRDIAAAIEAAKTAPESVIAIYAGNENLINGDWGHTSADTIIDVINRVKSELRGTKGANVPVGTVQRLNEWLSAPDAARLAAACDVIGANIYPFFTKGGEKDMKGTLNTQWKQFTSKYGNKARLTETGWPTAGSPSAQGNKPSVSNAQDYFNSFIEWTAEAATQAPFYFMMYDVSDAPGDDFEQHFGLAQDLGNLKIKVASTLSNIVSDLRDTFSILSSNDVPTETVVATDAPAPSTETPAPSSETPVPTSVTPAVASSAGSADTAVIIEPKPVAGSSSSGSSSGEDILTFDGKTFNT…
unitig_72	g13818	1928	unitig_72:533871-535799	OTHER	AA7(174-384)	N	N	1	MPTQDERVTPATVARMRNIISHISGAPVRPDDVANRVDPPAQAWSAGPSRNAPTRWNGWGYEDTKLYINANNDIEISGGRYAEVFHAASDRVLPSLRPWAERVIGLDPKQKSLAVNRSPEQLQVTDPQLSESQQDALDRFLRVLQDKYEIRVSTTMNDRVRHSHGQTCEEIYKLRNAKHLGRIPDVVVWPNSHRQVEDLVQEATKFSEAVCLVPHGGGTNVTNALECSDTESRAIVSIDLRQMKRILHVDKENMIIRVEAGVTGLDLHERLRNKGLTLGHEPDSWEFSTLGGWVATKASGMKKNIYGNIEDLLVNLKMVTPRGTLERAANAPRVSMGPDVQQAVLGSEGILGVVTEVTLRVRTFPQCQVYDSLVFPTFEHGVAAMHEVIRAKCVPASIR…
unitig_73	g13376	1163	unitig_73:36437-37600	SP(Sec/SPI)	GH76(42-360)	N	GH76	2	MLSRIACFAALACSTLLLGSTTSPSTMVSAAALTRDDVRLATQIYNNKFYNEYGNYGNSKKAMYMENTKRDHRQDFWRELEAIETLIDAYEVTRDEEFKKRIKYLYHGFRDKHGLTWEKNDFNDDVIWGVLMAIRAFEIFNDGAMMQMAIDNFNIVWKRGWDDKVGGGLWWKTDKKTKNTCVNAPAAIAAVLLHRETGDAVYKDRAHKIMQWTKSKLLDNGSGEVKGAMNAAGKVTEGGRTYTQGTYIGAAGMLHPLYPSEGWLDSAIKATDYAKNKMAGSNGLLPDEYCDGMADCPGFKSIFARWVGFFVRDHKQQQRYGAWLEKNAKAAWGVRNKDGLMWAKWGQRTPDNAVLTSWETASGVSMMSSVFFYHNEKKIARQLRSIE
unitig_73	g13377	1139	unitig_73:39784-40923	SP(Sec/SPI)	GH76(43-352)	N	GH76	2	MLTRFACLAALACASLSMTSTSVEALTRDDVRLATQIFNNKFYNEYGNYADSKKAMLMENTKRDHRQDFWREVEAIETVIDAYDVTRDEEFKTRIKYLYHGFRDGRGLTWEKNEFNDDIIWGVIMAIRAFEIFNDGGMKQMAVDNFEIVWKRGFDNAVGGGLWWKTDKKSKNTCVNAPAAIAAVLLHRATGDAKYKDRAHQLMQWTKEKLLDNGSGEVKGALDASGKITEGGRTYTQGTYIGAAGMLEELYPGEGWLDSAIKATDFAKSKMAGSNGLLPDEYCDGMADCPGFKSIFARWVGYFVRDHKQQSRYASWLEQNAKAAWSVRNSDGLMWAKWGQRTPDNAVITSWEAASGVSMMSSVFFYHNEQKIARMLRAD
unitig_73	g13381	1160	unitig_73:47108-48268	SP(Sec/SPI)	GH76(37-352)	N	GH76	2	MLARFVYAAALVCSTLLLGSTMTSSTVKALSRDEVRLATQVYNNHFYNDYGEYAWSRKAMYYATTERKGRDGFWTTLEEIEMLIDAFEVTGDAQFKDRIRHLYHGFIDAHGPTWANNEFNDDIIWGVLMAVRALNIFNDGAMKDMAVNNFNIVWNRGWDERTGGGIYWKTDKKSKNVCVNAPAAIAAMLLYRVTGDAVYKDRAHMIMQWIKTKLLDNSGEVKGAMDANGKITEGSRTYTQGTFIGAAGMLHQVYPNEGWLDAALKATDYAKSTISGPNGILPDEYCDSQNGGDCSGFKGIFARWVGYFVRDHKLQSRYGSWLESNAKAAWAVRNSNGLMWAKWGQRTPDNGVFSSWEASSGVAMMSSVFFFRPEQQIGRQLRSEEQ
unitig_73	g13382	1163	unitig_73:48775-49938	SP(Sec/SPI)	GH76(39-358)	N	GH76	2	MLARFVYAATLVCSTLLVGLTMAPSTTVNALTRDEVRLAMQVYNNHFYNDYGAYGNSRKAMYYGTTERKGRDGFWTTLEEIEVLIDAYGVTRDTQFKDRIRHLYNGFRDAHGLTWANNEFNDDIIWGVIMAIRAFQVFNDGAMKQMAIDNFNIVWKRGWDDKVGGGIWWKTDKKSKNVCVNAPAAIAAMLLYKNTGDAVYKDRARKIMQWIKSKLFDAKSGEVKGAMNAAGKITEGWRTYTQGTFIGAAGKLHKEYPSEGWLDVAIKATDFSKSTITGKNGLLPDEYCDGQSGGDCSGFKGIFARWVGFFVRDHKLQDRYAEWLEKNAKAAWAVRNGNGLMWAKWGQRTPDKRVFSSWEASSGVAMMSAVFAYNNDQKVLRQLRSEE
unitig_73	g13488	2410	unitig_73:292156-294566	OTHER	GT66(11-717)	GT66	GT66	3	MTPSPLVSTALLALICALSVLVRLFPVVLWGSVIHEYDPHFNYRVTKFLHAEGAYELRNWFDDRAWYPLGRSVGETVYPGLMLAAAGLHWVMETVFRLPVQVKHACVFVAPVFAALSCLSIFALTKEVTKRTTTALMAAMLLGISPAYISRSTAGSFDNEGVAIFLLVATFYAWLRAVRTGSMLSAASAAVLYFAMVISWGGYVFIINLIPLHTLAVVAMGSYSSRMYIAYSTFYPLATLMAMQVPFVGFNVILKAETAASHLVFLGLQVFALERWLRGQLSSEQLNRVFYKACAAVGGVFALGVVVAMAMGKLQWTGRSLTLLDPTYASKYIPIIASVGEHQPTAWGTFYLSLGPLMVLAPLGVYYSYQELDEGHLFMITYAAFAYYFAGVMVRLLLT…
unitig_73	g13509	1514	unitig_73:341044-342558	SP(Sec/SPI)	GH152(92-398)	N	N	1	MLSPKFFCFALALLSAVRADNETEDISRRDLHSHLLINVAVLDNSTVVVIPPVAPIEAIKAAESRAAANREVELYNNCGYEVQYKYTSGYNPATNSYLPNPAPGPNGYKLKPQERYTATFTSTWSGNVGVCAGESCETGDSCKDGCGVANGGPMTRAEWTFVPDGTDYYDVTVINGVNIPVMMEPLDVKYDTKDPYKCGSPGKVEDVVPGSGCSWDYAQFQKDINYNAVIGGSGKKCAAAGDCSGGEVCGYKFVPGVGMGMYCGNLYGWYSANQVCALDGGNKYFKCQDSAGDATGLKIHELHGCVAPKYLSGYQPASKGKDGEVCGCTNWDDRGVKVLAVPDTEKCKAVNPKWIEQVAPTLDFLKKGCPTTYTYPYDDMTSTFICGGEKKYRITFCPA…
unitig_7	g4332	2634	unitig_7:14936-17570	OTHER	GH81(105-825)	GH81	GH81	3	MAASTQRPNEASPLLPSLRPTERSDVGSLDKLRRSRFVLIPLLIVAIVGILWISTSNNADNAVETANTGSGSHLPEGQASPSDNYSDANLLKLSPPFDHKLHIIPPKMINRSAFTQAIPTNAFWTNLLVGDDHGLNVGAGQVTLSPYTVRSLPKRLDISYGDSRRVATNTSITEYFNADVSFTGYSRKIAEDQVGLSRLLGDGNSTSRHVVAFDPLSVTVQYSFDEGDSNGQTPKQYMDTLLVRGSPYVTVDYHEVIPVIEFNATVYSINAVPVQNEDEPTPGRQQWTGKRFEIDIGVYGATNDTVRQKWVLYFAEERTLNLQFANEKDYRAYNLRGELTIPTNVRLVDSDLYTGVARIAIVPDVERDGVLSSLDDHATVYPVGSSVNADVEGDAALVT…
unitig_7	g4343	1850	unitig_7:46572-48422	SP(Sec/SPI)	GH72(30-338)	GH72	GH72	3	MKFIGFKKYLCAAALVLAGLNALASDANALAPPIVAKGNKFFNSETGEEFRLKGMAYYPRPNGGELANVGNYDWAADEHENVWRPHLEIMQQLGVNTIRLYSIDPSKSHDAFMCACSEAGIYVLVGMTAPCENCSVIDEKPPACYPSELFSRVQMVYNAMAVYDNTLGFSVGNENNLQIKHGPGGTITAPCVKALLRDARTYASSCTETLRQVPIGLDIADIPPRDQWLQYYDCVIDDDENTRADWLGFNPYVECDPLGNQDYTDSEGLQSLMKEYKDVGYSRPLMFGEFGCNEGTNTIEGWENQRSFNDAKWMNDEPEMQAEIVGGNVFEFTTEIANLQKTKKITKTKDPGKFGIGYFEPDNCDHDAIPCEFIPYPEFDNLLEAFTSTKPSKIIMESF…
unitig_7	g4344	1843	unitig_7:48823-50666	OTHER	GH72(36-344)	GH72	GH72	3	MTSLTWPFASFNMVSTRFLVYLTALAASSVVVDAWLPPLVAKGNKFFDSDSGEEFRIKGMAYYPRPNSGELAGVTGYDWTTDDHEDVWGPHLEVMKDLGVNTVRLYSVDPNRPHDKFMCAASEAGIYVIVGMVAPCENCAVPDLAPPSCYPSELFTRVQMIYNAFAVYDNVLGFSVGNENNMPTAKDDTGTLSAPCVKALLRDTKAYASSCAGDIRQVPIGLDLADITPREQWIQYYDCVAEEDINTSADWLGFNPYVECDPVKHTSYEQSTGLQKLMSDYKAVNYSQPIMFGEFGCNKGANTVDGYENQRSFLDAKWMNEEAEMTAEIVGGNVFEFSTEIANLANEKKISKKADPGNYGVGYFDPATCDNDKTVCEFTPYPEYENLKKAYTTTKASTN…
unitig_7	g4345	1716	unitig_7:50976-52692	SP(Sec/SPI)	GH72(28-336)	GH72	GH72	3	MLSSRRIIATAAVVLSSLLALQTTDAWVAPIITKGNKFFDSESGNEFRLKGVAYYPRPNAGELYKVDNYDWTTDDHEKIWSPHIERMKELGVNTIRLYSVDPSKSHDKFMCACSNAGIYVLVGMAATCKDCAIPDEESPACYPSALFSRAQMVYNAFAVYDNTLGFSVGNENNLQMLHGKDGTTTAPCVKAFLRDVRRYAKNCAGQLRTVPIGLDIADILPRSQWLEYYDCSIDNDENTRAEWVGFNPYVECDPLGHTKYSQSTGLQNIMHEYASSGYSRPIMFGEFGCNLGKNDKDGFENQRAFNDAKWMNEEAEMTSEIVGGNVFEFTTERNHVAGEELNKKADPGKYGVGYFSPDDCDHGSIPCEFVPYPEFENLKKAYQTIKPSELTLTSYTPSR…
unitig_7	g4360	1742	unitig_7:88932-90674	SP(Sec/SPI)	GH72(107-414)	GH72	GH72	3	MAFGVSVRGLVYTALAVAAITSVDAVEFSKEADASTAATVSAAGGSAAADATPATAASGASAAADAAPAAAKSSAKSSTSSAAADDTASSAAATPIKAGEKLNKGWLNPIVVKGNKFFDSVTGLEFRMKGMAYYPRPNDGEFANVANYDWASDDHENVWKADLAVMQDLGVNTIRLYSVDPTRSHDKFMCACAEAGIYVLIGMAAPCENCAIPDEKPPKCYPDELFSRMQMVYNAFAVYDNTLGFSVGNENNLLRKYVEGGTQTMPCVKALLRDTRNYAASCSGSVREVPIGLDLADILPREQWMEYFDCAADDNEFSRAEWIGFNPYVECDPLKHTEYSQSTGLQTLMKAYEEVGFSRPLMFGEFGCNLGENTVDGYENQRTFYDARWMNEEKEMTDQ…
unitig_7	g4435	895	unitig_7:328356-329251	OTHER	AA6(22-110)	AA6	N	2	MTMASPRSRDDWRKAFPLFGSAGLFFSIGTLGGGQETTAYSALPFFAHQSLTYVPLGYRSPLLFNLEEVHGGSPWGAGVLAGADGSRQPSTLELDVAEVQGESFAGVAKKLTA
unitig_7	g4448	1298	unitig_7:351382-352680	OTHER	CE10(166-402)	N	N	1	MQLIRSIQRHETLVKTWRLLHSCVVSVLLRLNADHVRRLLLHGVIGVSIYGVFAFMLGGMYRYPWELVGVVMRLNYVTVRTVAGYVARGCKPLYPEWTLAFELLRAWMRCIMSVYGDRLVLPKNAQFLRWQSDWIGTREGRDACRLHGTTMETFEHNNLEHIWVRGRVLNPSKTTRPRRLVVLYFHGGGFAVLSPRMYVRYANEILAKINDKLAREHVHSPVQVDFLMGNYRKIPEHPYPIPPQDAYCVYEYLIHHEKLDPSQIIVAGDSAGGALAITTLLRIRDRHMEPPLAGLVSCPFVDMTVKGNELETPHCIIGDKAIHAVIKSYHSFEGDPATWGDVSPVHCNLRGLPPVYIQAAELDYILPHSLNLYAKAKADGLDHWVLDVHKNLPHVYTTT…
unitig_7	g4452	1280	unitig_7:362018-363298	OTHER	CE10(162-421)	N	N	1	MTAAELLLSDGVVAFFIVVALCTASVGFLLQLSTFAVLCLALLAEIWMVLAWCGLAASCETVWELPAVMVNIQFSLARAGMGIVSRGFRPRFPQWTVSFEFVRAILIGMRGGKFGYNLVKRRNAQYFRQQGEIIGTIKGTKACRQFGTMVNPVMLNGLEHLWIRPKSDTRSKTRLVLLYYHGGGYVLFGPRFYVDLGNRLRAEILTKLQQLDSKRMENVTVEVLLANYRKSPEHHFPVPEEDALSMYKYLLEQEGVPANHVILGGDSAGGGLVMSTLLRIRDETNLPQPTAAILACPFVDLAEDPSADKARDRNCILPVTLLDAFIHTFHPTPADPKTWKDAASVYCDLHSLPPTYIQTGTCDTIHQDAVKLYAKAQADGLTTWEYDAFENMPHAFIVV…
unitig_7	g4453	1280	unitig_7:363951-365231	OTHER	CE10(160-422)	N	N	1	MAAADLLLSEGVGTFFAVTALCTASVGFMLQFSTLVVVCLALVAVIFMVFVWCALAASCETIWELPRTILDIQLAVVRTVLGIASRGFRPRFPQWTLRFEVARAVMSAMRQGRSAQNIVTARNAQYFRQQINLVGTMKATAACQEFGTMVNPLNMNEMEHLWVRSKRDMRSKTRLVVLYFHGGGYVHFGPRFYVELANRLRAGILTKLQQLDANQAENVTVEVLLANYRKSPEHQFPVPQQDALSMYKYLIEREGIPANHIIVAGDSAGGGLAISTLLRIRDETSLPQPAAAVLICPMADLADDPSADKARDRHCILTVPMLRAFIHAFHPTPADPKTWKDAASAYCDLRGLPPAYIQTGMCDTIHQDSVKLYAKAQADGLTTWEYDAFEHMPHAFVIV…
unitig_7	g4459	1361	unitig_7:379961-381322	OTHER	CE10(195-440)	N	N	1	MRCDCYVVRRSFPTHALPAMVSVVTKSSSRHPIPLDKALRLLRSRVIALLLNLNGAKLRGMVLRGGSVYAFFALMLGGFYDKPWELVEVASRMSFTIVRAIAAYVARGCKPLYPGWTLPFEVTRAVIRCSMSVYGDRLLVPSNAQFVRTQSEWVGTALGFLSSWQMGTKTEAFHHNGLEHMWVRNAKRSVTPNTRRFVVLYYHGGGFAVLSPRMYIHFANEMQTRIAKMLHEQLGDHEDDTSIQVEILLANYRKLPEYQYPVPPEDAYKMYEYLLHVEKVSPNQIVLAGDSAGGSLAMSTLIRIRDQQPTQPLGAFLSCPFVDLEVGGDERRVPHCLIGDKASDAIYTAYHPRNGPPSTWGDASPVHCDLQGLPPVYIQAAELDYILPHAQNLYAKAKA…
unitig_7	g4460	1334	unitig_7:381797-383131	OTHER	CE10(176-427)	N	N	1	MVSVRLLAPRPTRLLTPVKALRLLQSRLIAVLVSLNAAKLRRLLLRGGSLYGAFALLLGGFYRHPLELVEVTARVNFTIVRTVLAYVLRGCKPLYPEWTLGFEVVRAVVRLTLSGYGDRLLLPQNAQHVRWQSEWVGTALGFVSTRQLGTSVEPFQHMGLEHLWIRSRTPPVAKSGRVHRVVVLYYHGGGFAVMSPRWYIAFASEVQSRVAKLLHAQLGEHDDDAAIHVQVLLANYRKIPEHPYPLPCDDALSMYEYLLTHEKLSPSQIILGGDSAGGALVMSTLLRIRNHQPVNTPLAALLVCPFIDMESGGNEHEYPHCIIGDRLGIAIYANYLPKEGDVWSWGDASPAHCDLQGLPPVYIQAAELDYLLPNSKRLYEKAKADGATDWTMDVHKNLP…
unitig_7	g4461	1307	unitig_7:383427-384734	OTHER	CE10(167-423)	N	N	1	MVSIKLLASSKARKMLKPSQALRLVQSRVVTVLLSLSAAKLRHLVLRGALGGSIYAMLAFALGGCYSRPWELIGVLVRMKYVVCRAVMAYIARGCKPRFPEWTLSFEVVQSVMRCAMKSYGHRMILPASAQHVRWQSAWVGTAIGHLSCGKHGTRVEPFYHNGLEHVWVRPKSSSPSSRRLVVLYIHGGGFAVLSPRLYIYLANEFITRVTAKLREELGFDGSFHVEVLLANYRKVPEYAYPIPPQDAYCMYEYLVHVEKLSPRQIIIAGDSAGGCLALTTLLRARDQSSTQLQPLAGLLLCPFADMEVDCNEDRAPHCVITDSCQLAISKYHPRIGEASAWGDASPAHCNLEGLPPVYIQAAELDYLFPHAQSLYAKAKGDGVNDWTLDVHKNVPHVF…
unitig_7	g4509	1340	unitig_7:510147-511487	SP(Sec/SPI)	CE13(81-287)	N	N	1	MLHKLVLAAAAALALTTVSAYRPGDEVCVVSPDNACPLEKLTPSTLDTSTLVYPGGKTRCAFDAFSTTNFTTNATYFFQVFPNQKKDTTKLMLYLQGGGACVDDDTCSFALQCGLGSSSTFTVNARAMSNGVLNRTDENNTFKDWNIVHVPYCTGDIHIGNLVKEPYEPIFASILGNNECLKQNKTAHHNGYENALSAFKWAAANYPKPEHIVLAGSSAGALGAQLFGKMISDLWKVEDNKIRYTIVADSYVGVVPEDKPASRIVDYFNSCTLDFGLSSDIEKKCDNASASVIDVIKPMIKATPFSDWLFIDSKADVVQRKFFELFDDGILGYPFTDLLPEDQFFGNMSTIIEAYKSASSRVSAFFVEGDHHVFLNLVNWYSTTSTSNQTLGAVMRDVL…
unitig_7	g4511	2117	unitig_7:514147-516264	SP(Sec/SPI)	CE13(378-610)	N	N	1	MARLTMLVTALVVFMAPEVSGRGLRSQNGQELTTTPSLGVFVDALEAVNEQRANKRVSGSVDCEVSAWEEWSTCDESSMTQTRKRTVETAPQGSGSPCPRLVQTIPCKPVHCAVSAWGEWSACLDPGYKIRRRTVVREPKYGGTECPHVEARRKCHPKDCFMSDWSHWVCDEATATKRRTRHVTKPAQAGGEPCPKVEEETEPCDPIDCELDDAFGPPTCDSNGLQKRYRLIRTKPKFNGMECDTIPGYEQQEKDGKCPVDCKFTEWSKWSNCDPLTGKKKQTRTVKAPEQYDGKPCDGGREREESCPSPPRDSFCVVTPENECPVDKLLPSTQDGSTLIYPGGKTRCAFDDYTDPVTGFTSSAAYFFQVFPTRNSQPKKKLMLYLQGGGACSGDDMCA…
unitig_7	g4542	3847	unitig_7:605835-609682	OTHER	GT20(299-800)	GT20	GT20	3	MLQRLRHVVGWGLPPQPSGSRIDFQVCAELGHGQTLYIVGDIPALGGSIDAVPNPAAASNSSSSTTTSSSEPGLALVTTPDLYPIWYNLEPVIVPVGSVIRYRYAVCSGSKFMRYERLTVQCREIIVGMEDMQMQDTLDSLSPPSGDVWGFVPRLSSGQAFMDRRASGGSGSGDSAEGSTSGGSWFKRITKPRFSQSITESIPEEEGADVVMQEAENEDGEEKEGEHESMYEPNTLVASVRSPSSYGSLHRHQSAPPLSMSLKDQLNANVDEDARLLCSSPVLNRARTFSDDSVKSPQNVTIESTDGVIIVVYRLPVLVQRTPEGEYHIEWEDDNLLCPSGLLKESTQHAGGWDRVNSMRLTWVGTVHCSSAIPKEDEDRLARQLEAFHCVPVFLNQPL…
unitig_7	g4551	2327	unitig_7:628570-630897	SP(Sec/SPI)	GH47(44-552)	GH47	GH47	3	MRSWAARVLSLLGCVLVVFTASVAVEARMHASEMRYLRDKARDMFYHGYQSYMEHAFPWDELKPLSCEGRRWDRRERGDLDDVLGGYALTLIDSLDMLAVLGDRDEFHRAVRLVIDNVSFDRDVTVSVFESTIRVIGGLISAHLIASPAHLGVLTADEYKGELLDLAVDMGNRLLPAFETPTQLPVHRVNLKRGMLKHAPAMTCPAAAGSLLVEFAYLSRLSGNPVFEEKAKRAVVGLWWRRSEINLLGSSIDVFSGEWLTSHVGIGAGLDSYFEYLLKYHLLSGDKSWFDMFLASYRAVETHINHDDFHIEVDMHHGRQAVRSRRVSALQAFWPGLQVLAGDVSRAMRSHDKLFLLWNQFGAMPELVDLLSNEDGTTTSGSVISWARTSPLRPELIES…
unitig_7	g4594	1229	unitig_7:752609-753838	OTHER	GH5_14(101-382)	GH5	N	2	MFHQLTRLAVAAASIFVAAAGHEQHNRTLRAAVEPANHIQHAIRAGSVRSRGVNLGGWLVSEQWMTQQATFWQNLESQYANKGEYIALAQGANRDWRLAQFENHHATFVMDKDIQEIANAGLNTVRVPVGFWITGADPFDPSGQGAWKVFPKDTLQRLDTLIRDYALKYNIAVMISLHAAKGSQNGEPHSAPPDVGRAYWSLYSENVDNSIYVVKFLADRYRNDAAFLGIGLMNEPMADTVESVLNNYYIRAYQAIRDTGNTCILSIMPLLYKQTPDNLVGFMERPAYYNVWVEWHPYFIWGFENWSAEDLVNNGIRRDFLNKMNQWNSRPNANPMFFGEWSLASSGQYTNPDSNDFLTWTRAQMDAMKTAKAGWTYWSWRIYGDENGFNGWSMRNVLR…
unitig_7	g4597	1229	unitig_7:756741-757970	OTHER	GH5_14(101-383)	GH5	N	2	MLYQLTRFAVAAASIVLTVAGQNQYNRTLRAAVEPANHVQHAIRAGTVRSRGVNLGSWLVAEQWMTKEANFWQNLDSQYANKGEYIVLAKGANHDQRVAQFENHHATFVMDKDIQDIANAGLNTVRVPVGYWITGADPYDTSGQGAWKVFPKDTLQRLDTLIRDWALKYNIAVMISLHAAKGSQNGEAHSAPTDLGKAYWSLYSENVDNAVYVVKFLADRYKNDAAFLGIGLMNEPMADTVESVLNNYYIRSYQAIRGSGNNCIISIMPLLYKQTPDNLVGFMEKPSYTNVWVEWHPYFIWGFENWSAADLVNNGIRRDFLNKMNQWNSRPNANPMFFGEWSLASSGQYTNPDSNDFLTWTRAQMDAMKTAKAGWTYWSWRTYGDENSFNGWSMRSVLR…
unitig_7	g4599	962	unitig_7:760684-761646	OTHER	GH5_14(38-245)	GH5	N	2	MTGAADFWKNLDGQYANKGEYVALANGADHDQRVAQFGNHHATFVMEKDIEDIANAGLNTVRVPVGYWITGDDPNDPAGRELWKVFPQDTLQRLDTLVRDWGLKHNIAVLVSIHAAKGSQSGADYSAPTDPGKAYWSKYAENVDNTIHVAKFLADRYKDDAAFLGISLLNEPTADTDEKVLNDYYQRAYKAVRESGNDCVLTIMPLLYKQAPDNLVGFMEKPSYTNVWVEWHPYFIWGYEKWSAADLVNNGIRRDFLNKMNQWNSRPNANPMFFWRVEFGELGSVHEPRLERFPHVDSCADGCDEDGEGGLDVLELAHVW
unitig_7	g4603	4263	unitig_7:771675-775938	OTHER	GT1(217-530)	GT1	GT1	3	MDASEWNGGNAQKTRREGKKLTEAIRFVRVGQRLTPREARPFIDLTDTAATFDKNGRIQLDFGREDTKYDLKAIQERTRTLLSFKIPASGSVDEQVPLMNICIMIVGTRGDVQPFVGIAKRLQQGGHRVRLATHAVYRDFVMEHGIEFYPLGGDPKELAAYMVKTGGHIIPLKLDTLIKDVPRNVQMIEEILNSTWPAVSAADLDANGKGIPGRPFQANAIISNPVTYGHIHVAERLGVPLHIMFPQPWVPTTAFPHPMANLTYDGKPHKRNYISYKLVDFLMWKGTDSMVNQFRGDVLGLPKIRKGGWGQDILLDLAIPHAFMWSPALVPKPHDWGHIYDVIGTVQLKGVGSTYNPTPELERFLGNDGGPIFVGFGSMILSDPAKTTKMIIEAATQAN…
unitig_7	g4604	4126	unitig_7:776191-780317	OTHER	GT1(201-514)	GT1	GT1	3	METATQVPFARVVEAPRASETHALYSQESVEAMALFDKNGRIQLDFDGDDEEYDISVMQEQLKVVQSVQVPAPSLDDEIVPRMNVCIMIVGTRGDVQPFIGIAKRLQQDGHRVRLATHAVYRDFVMEHGVEFYPLGGDPKELAAYMVKTGGHIIPLKMETLMNDVPRNVQMIDEILNSTWPAVSAADPDGNGKGIPGRPFQANAIISNPVTYGHIHVAERLGVPLHIMFPQPWVPTTVFPHPMANMAYDGRVQKRNYVSYKMVDLLMWQGTESMVNKFRSEVLGLRKIRKGGRGRDILLDLAIPHAFMWSPALVPKPHDWGHIYDVIGTVQLKGVGSSYHPTPELETFLGNDGGPIFVGFGSMILSDPAKTTKMIIEAATQANVRVLIQSSWSDMAGDI…
unitig_7	g4605	4031	unitig_7:780685-784716	OTHER	GT1(197-510)	GT1	GT1	3	MDANPSVHEVEATGAAEEWLVESNAVEAVAVFDQNGRIQLDFADDDDEYDVSVMQKYLRVLQSVHVPNPRLNDDVVPRMNVCIMIVGTRGDVQPFIGIAKRLQQDGHRVRLATHAVYREFVMEHGVEFYPLGGDPKELAAYMVKTGGHLIPLKLDTLMNDVPRNVQMINEILNSTWPAVSAADPDGNGKGIPGRPFQANAIISNPVTYGHIHVAERLGVPLHIMFPQPWVPTTVFPHPMANMAYDGKIQKRNYVSYKMVDLLMWQGTESMVNKFRSEVLGLRKIRKGDGGRDILLDLAIPHAFMWSPALVPKPHDWGHIYDVIGTVQLKGVGSSYHPTPELETFLGNDGGPIFVGFGSMILKDPAKATKMIIEAASQANVRVLIQSSWSDMAGDIKVPS…
unitig_7	g4607	2281	unitig_7:788925-791206	OTHER	GT1(175-488)	GT1	GT1	3	MEYAFQARAEATALFDRHGRIRIDFGNEDNDDDVPVEQEALAEEQYERDREEDVVIPHMNVCIMIVGTRGDVQPFIGIAKRLQQDGHRVRLATHAVYRDFVMEHGVEFYPLGGDPKELAAYMVKTGGHIIPLKIDTLVHDVPRNVKMVEEILNSTWPAVSAADPDANGEGIPGKPFRANAIISNPVTYGHIHVAERLGVPLHIMFPQPWVPTTAFPHPMSNLAYNDKPQKRNYISYKLVDMLMWQGTEGMVNRFRTDVLGLRKIRKGDGGRDMLLDLAIPHAFMWSPALVPKPADWGHIYDVIGTVQLKGVGSTYSPTPELERFLGNDGGPIFVGFGSMILSDPVSTTKMIIEAATQAQVRVLIQSSWSDMAGDIKVPSNVFFLGNCPHDWLMPRVSAV…
unitig_7	g4608	4228	unitig_7:791804-796032	OTHER	GT1(225-537)	GT1	GT1	3	MTEEPTRWQRTRGVYETHRTRFASKAQGKIARVVEKVKDTERSTRAKIGSLALAVHGIVMFDENGRIKLHFDGDDDKYDISSMLEHDKAIQRETETFVNAMDDVVPQMNVCIMIVGTRGDVQPFIGIAKRLQQDGHRVRLATHAVYRDFVMEHGVEFYPLGGDPKELAAYMVKTGGSIIPLKIDTLVHDVPRNVKMVEEILNSTWPAVSAADPDANGEGIPGKPFRANAIISNPVTYGHIHVAERLGVPLHIMFPQPWVPTTAFPHPMSNLAYNDKPQKRNYISYKLVDMLMWQGTEGMVNRFRTDVLGLRKIRKGDGGRDMLLDLAIPHAFMWSPALVPKPADWGHIYDVIGTVQLKGVGSTYSPTPELERFLGNDGGPIFVGFGSMILSDPVSTTKM…
unitig_7	g4622	5026	unitig_7:821816-826842	OTHER	GT1(214-521)	GT1	GT1	3	MENTKPVKKLNPKLARAFDAIKAERTRMRLGSFADVVHAVAAFDKEGHINLAFDEDDDKYDITAMQQHDKQVQKYEATQQSVPGEVVPQLNVCIMIVGTRGDVQPFIGIAKRLQQDGHRVRLATHAVYRDFVMEHGVEFYPLGGDPKELAAYMVKTGGHIIPLKLDTLLKDVPRNVQMIDEILNSTWPAVSAADPDGNGKGVPGKPFVANAIISNPVTYGHIHVAERLGVPLHIMFPQPWVPTTAFPHPMSNLPYDDKPQKKNYLSYKMVDLLMWQGTESMVNRFRKDVLGLRKIRKGDGGRDILLDLAIPHAFMWSSALVPKPADWGNIYDVIGTVLLKGVGSSYNPAPELEAFLGNDGGPIFVGFGSMILSDPVGTTKMIIEAAKLANVRVLIQSSW…
unitig_7	g4623	2366	unitig_7:827515-829881	SP(Sec/SPI)	GH3(115-327)	N	GH3	2	MLTSWFKAVCCTALALAVVPQSAYAAESAADRAAKIVEKFTVDDILGQMTQINIDSILDGNGNLDEAKVRDFAKLRVGSYLNSPFAGGPKNGKYGYSVSEWRDLVGRIQNISMAENGGHPIIYGLDSVHGAIYVQNATIFGQQINGGASFNTDLVKKMGEITGRDTAAAGVSWIFGPILEISQHPAWARTFETFGEDPYLVSVMGSAIIKGMQSNKDVAACMKHFVGYSKTPTGHDKDGVTLSDFDLLNYHMPSFIAATKAGVKTAMENYVSINGVPVVSSSKILRDLLRRDLGFEGFVVTDWAEIYNLNWFHRVAKNLAEAVRMSLTQTSIDMSMVPYEATFIDYGKEMLKNYPEYFERLKESARRIVQTKIELGLYDSPLPGAKYIKNVGSSKDRDV…
unitig_7	g4638	1265	unitig_7:861777-863042	OTHER	GH5_14(113-394)	GH5	N	2	MLYQLARFAMAAASVVVAVSGQGHHNRTLQSYSFDELAATENVAAAPADHVQHSIRSGKVAAKGVNLGSWLVTEQWMTAQAPFWKNLDNQYANKGEYIALAKGADHAKRVAEFENHHATFVMEKDIQDIANAGLNTVRVPVGYWITGDDQFDPSGKGAWKVFPKDTLKRVDTLIRDWALKHNVAVLISIHAAKGSQSGADHSSPTDPGKAYWSKYPENVDNTIHVAKFLGDRYKNDAAFLGIGLLNEPTGDTDEKVLNDYYQRAYKAVRGSGNNCVLTIMPLLHKQTADNLVGFMEKPSYTNVWVEWHPYFIWGYEKWSAGDLLNNGIKRDFINKINKWNSRPNANRMFFGEWSLASAGQYTNSDTEDFLKWTKAQMEGMNKATGGWTYWSWRMYGDEN…
unitig_7	g4706	1373	unitig_7:1009150-1010523	SP(Sec/SPI)	GH6(37-302)	GH6	N	2	MRTACQLLAAAFAAHASSATAYGALDCKSSLTGSYAQAVQTYPHLKNAISMVASQSIGVWYTDRQTNTAESTRSFFLPKCEGSVNQASQNQGIASQRPTIVVYGLPQKDCEHGFSTAGSNKNSDDYRAFLNLLAEASQNQPVIYILEPDAIGLLAKNGCGNSNNYAANLALALDVLGANPNADIYLDIGYWTVMSDDGAAEVAEVVKKVDTSGRCKGIALDTSNYRSVKEMATSCERFARVSGKNYHCIVDTSRNYVPPASNEWCNAKNTGIGQLPTANTGHDLIDHFVWVKPPGESDGECSGQTSDSLPGPSAGSFFTEHFVQLWNNGVFVQELGQAPLSVNPGVQDVVVNVTDSASNTTPPSVVSEATQQVPVTVNSSDRDDFFTTSDVVSDSNESS…
unitig_7	g4735	2564	unitig_7:1087759-1090323	OTHER	GH123(326-620)	N	GH0	2	MEPTPSSSPSAAASTAFPTPRNSLDAIDLQSPSVASKSAFSAVERDDDDANMSNDDAMSDGSSLGIDGHDDAGNAASLALDYDIMAYMLGRTVPQQGQQMASPTKRSASFSDLFASSNGSSRHLSRPASLNYIPTSLSSAPPSGTSPLSLWMNSEWPPPISPQRKRRRQGLWLHAQFAPAMTKSVRRLSPPREIFPDLEDDLMNGVAVSEPSDGRRRRHRQPWGVPDAPSYQDPEGKYVVAARNEVIGTQLRVLASAPFLLTTDSTNWFLPEGHTPRCRVQIERSYLPQAIQIETFLVGYVEDENGDELTETLDTRGYSETQAVEHIVYLRLRVGSDVPEGTYEIPVRLYTQLPGFAFDEALSWTTTLHVRVASTLLPSPSQWRFHLDLWQHPTSIARL…
unitig_7	g4815	983	unitig_7:1296462-1297445	OTHER	CE11(6-316)	CE11	N	2	MPSWMRTLRRAVEFAGVGLHSGQHVRVRVAPGAQEAGIRFLYGGDEESARPPIHAHVSNVDSSKSQLCTQLRAEDGSWSVSTIEHLMAALTAARITSANVEILESNGGNVVEVPILDGSAEPFAQKIAQVGVTDVLDAPLQYLRVKQPVQVVHEDKAAWLLPMPSVSGRTQQETPVLNLSVQVNFEHKGLGTRFCRFILDHDPDANLKQFLQHVAPARTFTFEEEIEWMRAHGLALGGSLENAIVFKEAQRLRDDPSAAFEVLNEEGLRFPDDEWVRHKMLDCIGDLGLLGMPLHGYFFATSPGHALSHRLVEELLRDARNYEITST
unitig_7	g4864	1067	unitig_7:1414613-1415680	SP(Sec/SPI)	AA14(20-285)	N	N	1	MKLAVVLSTAAVLTHSTSAHIVAWGRGMYCLNGTNPNVDDQNTNTAVNPLYQLPKEKWWFQADRGCDKSPPRPGDILKLPAGGSFEVEFATNRAMTTLSYGGKQATEWTGGETFPSDWKGKNPPECLGALHAESEAKAAGTAFAISYVSELEDVTMENLVVFTTLEHTPWKRKGVYQVPKNMPACPPQGCICAWLWVPDGCGQPNMYMAGYRCTVTGAATGYKLAQAKPPVYCADDKSKCVKGAKQMIAWNQQTGDNVKTPPGKSPGYNEGCGWSNGAQNDIFVEVGGDGDNTPMPSQAPVTSQAPGSQAPQPSGTAKPSRTPNTKSPVPSSTHDCERGKVHPHSEDDGYSNPDY
unitig_7	g4865	1145	unitig_7:1416186-1417331	SP(Sec/SPI)	AA14(24-289)	N	N	1	MKVSAIFSVSATVAVVLTQSASAHVMAWARGMYCLNGSDPSVNDQNTNLAVNPLYDLPKEKWWFQADRGCDKAPPSPGDVLELPAGGSFEVEFAINRAFTTLSYDGKQATEWTGGEKYPSDWKGKNPPECLGPLHAESESKAAGTAFAISYVSDIKDVTMENLVVFTTLAHTPWKRKGVYQVPKYMPACPPQGCMCAWLWVPDGCGQPNMYMAGYRCTVTGAATGYKLAQAKPPVYCADDKSKCVKGAKQMIAWNQQTGDNVKTPPGKSPGYNEGCGWSNGAQDDIFVEVGNDDDDDSLSVPSSTPAPSQTFAPSQPPAPVASSPAPSTPAPQPSSTDKPSVTPSTAPTQTPKPSRHTPKPSGCKRATARPREIEDDESDY
unitig_7	g4986	1820	unitig_7:1640155-1641975	OTHER	GT71(269-497)	N	GT71	2	MVPSTLPSPSSTQSLMKTEDTSMASIAPSPSSGSMSRSSNSRLFGLFFLIVFSCSIGLFSVASFVQRSGPDFHYGSTTTASSTTTHMKAEMLHLRDGGDLQTVLSANGGVTTPSPTVATPAPAPVVKETVEARWQRLGDLDEYECVGWQQSKDCTPKGEVDLTFFRSCNETIENGQAGYCEIRHKATGKIEPIMEMYCDSLRPAVRFQCGDFKKILSYGRQAPEYTHDASFSYEQCRTSFVADQEAANVPVPAPAITEVALEPTKWFKRGISIVVYERLLESVYASIRSMRALGCTLPIELWYIAEETDRHHPILQKLTQEYGAYLREIQDRRASRFYTKIYAVFYSAFDQVLLLDADNFAVRDPTYLFSTGEFVDTGAIFWPDFWRFKKTIFNIQPTS…
unitig_7	g4988	1883	unitig_7:1642978-1644861	OTHER	GT71(298-525)	N	GT71	2	MTETPPPPKKGSLLPVVLNTANASASAAGKPSRKRSAGAHPKRRSRSISTDDTNPGALSQGTAAALAMLGSERSSWRVLRLLFLFALFVSLVCLATLGFLVQQNGLSNGMIDSGSPRGGASRGILSSLHNVEVVSRLQHLTTWFSKVENTEVRKQKTREDIMSLSDYECVGWRQTTNCTPSGVREIANDQNCTTLIANGVSGYCEIQNKKTGERKRVMEMHCDSLRPAVHFSCNMFQSLLSYSILSLDYVHDTQFTYEKYQRDFRLENKLPDTPVPIGDDGFKNQSVGQLELSFERAIVMVIYEKLLLGAYVSIRSLRAMGSTLPVEMWFKRSETDVNHPLLKILVAEYGVYLREIKDDRATRFYTKLHAIYYSAFDNILLLDADNFPIRDPIYLFETP…
unitig_80	g14449	881	unitig_80:297552-298433	SP(Sec/SPI)	GH19(92-292)	GH19	N	2	MKTAQMLIAMACAAASANAGYVYVGSDGNKAAMDQWCSQNCPSYCPTDICKADGGSNPAPAPAPAVTPAPAPVPAVNPAPAPTVASGSGFSKYLTEAKFKELFPESIDLYTFAGLVDAAKKYPTFANTGNEVNDKRELAAFLAQTSHECDHYKAAEEYAKDTFPETQYCDPKTIPCAAGHRYHGRGPIQLSWNYNYKAAGDALGVDLLNKPELVGTDKTVTWQTALWYWMTPQGGKGVIHDIVAGDFAQSTNIINGGLECGGPSKANEQQRIEYYKKICSALGVEPVAKVSCN
unitig_80	g14450	806	unitig_80:298734-299540	SP(Sec/SPI)	GH19(61-267)	GH19	N	2	MKLSIVFTALCALAYGHDVASAYNFTDSTETTETANVPVEYETAEAPVEYETAAAPAATGISRYMTEAQFKSVFPNAIALYTFKGLVDATKKYPAFANSNDATKNKRELAAFLAQTAHESDNFKAAEEYNHASYPVSQYCNPSQVKCASGKRYHGRGPIQLSWNYNYNAAGKALGHDLLNNPQLVATDKSITWQTALWYWMTPQKAGRIIHNVVTKDDGFAQSTDIINGGLECGPSAPNKGNEQQRIKYYKTLCSKLGVTPVKKVSCN
unitig_80	g14451	920	unitig_80:300359-301279	SP(Sec/SPI)	GH19(106-305)	GH19	N	2	MKTASILIAMACAAVAVEEVTAGYTYVGSGGDKAAMTQWCNWNCPGYCPSDICKADGGSNPAPAPAPPKPAPAPAPKPAPAPAPKPAPKPAPAPKPASGGSGFGKYLTEAKFKELFPQAISLYTFSGLVDAAKKYPKFANTGNEANDKRELAAFLAQTSHECDHYKAAEEYAKDTFPVTQYCNAGQVPCAAGKRYHGRGPIQLSWNYNYKAAGDAIGVDLLNKPELVSSDKSVTWQTALWYWMTPQGGKGVIHDIVANDFAQSTNIINGGLECGGPSKANEQQRIEYYKKICSALGVQPASKLSCN
unitig_80	g14452	770	unitig_80:301736-302506	SP(Sec/SPI)	GH19(49-255)	GH19	N	2	MKLSVVFTALCALAYGHELVSANNSTETVDTVDVPVEYETAAAAAATGISRYMTEAQFKSVFPNAIALYTFKGLVNATKKYPAFANSNDATKNKRELAAFLAQTAHESDNFKAAEEYNHASYPVSQYCNPSQVKCASGKRYHGRGPIQLSWNYNYKAAGNALGVDLFNKPELVAKDKTITWQTALWYWMTPQKAGRIIHNVVTKDDGFAQSTDIINGGLECGPSAPNKGNEQQRIKYYKALCSKLGVTPVKKVSCN
unitig_80	g14453	863	unitig_80:305125-305988	SP(Sec/SPI)	GH19(82-286)	GH19	N	2	MKTTQILVAMACAAVAVEEVNAGYVYIGTGGDPAAMTQWCNWNCPGYCPPDLCRADGGSNPTAAPTPNNPTPGPGTSAGFSRFLSEAKFKELFPQAIWLYTFSNLVEAAKKYPAFANTGNELNDKRELAAFLAQTAHESDYFKAAEEYAKDSYPVTQYCNPSQVPCAPGKRYHGRGPMQLSWNYNYNAAGRALGIDLLNNPDLVSSDKSITWQTALWYWMTPQKAGRIIHDVVTRDDGFAQSTDIINGGMECGPSAPYKYKELQRIEYYKRICSVFGVQPVARVSCN
unitig_80	g14455	1127	unitig_80:308355-309482	SP(Sec/SPI)	GH19(173-373)	GH19	N	2	MKNAQMLIAFASAALAAQTVSAAGYVYVGTHPDKTGMTQWCNWNCPQFCPTDMCKEGSGGDVTPAPSSSTPAVTPAPSSVAPTTEPTETPDASSAAPSATPVASSAAPSATPVASSVAPTTAPSATPVASSVAPTTAPSATPAPSSAAPTTAPSTTPAPSSGAPSTGGFSSYLDEAKFKELFPESIDLYTFAGLVDAAKKYPTFANTGNEVNDKRELAAFLAQTSHECDHYKAAEEYAKDKFPETQYCDPKTIPCAAGHRYHGRGPIQLSWNYNYKAAGDALGVDLLNKPELVGTDKTITWQTALWYWMTPQGGKGIIHDVVAKDDGFAQSTDIINGGLECGGPNQSNELQRIEYYKKICTKLGVEPVSKMSCNA
unitig_80	g14456	911	unitig_80:310453-311364	SP(Sec/SPI)	GH19(104-302)	GH19	N	2	MKNAQVLVALACATFAAEQVSAGYVYVGSTGDKAAMTQWCNWNCPGFCPGDMCKQEGGAPAPAPGPAPIVPAVNPAPAPAPGPAPAPAPAPAPAAGGSGFGKYLDEGKFKQLFPESIPLYTFAGLVDAAKKYPSFANTGNEVNDKRELAAFLAQTSHECDHYKAAEEYAKDTFPESQYCNAGQVPCAAGHRYHGRGPIQLSWNYNYKAAGDAIGVDLLNKPELVGTDKTVTWQTALWYWMTPQGGKGVIHDIVANDFAQSTNIINGGLECGGPSKNNELQRIEYYKKICATLGVEPVAKVSCN
unitig_80	g14457	926	unitig_80:312375-313301	SP(Sec/SPI)	GH19(107-307)	GH19	N	2	MKIAQVLSAVAFSAFAAETVAAAGYEYVGTSGDKAAMTQWCNWNCPGFCPGDMCKASGGAPAPAPIVPAVNPAPAPAPAPAPAPAPAPAPAPAPAPAAGGSGFGKYLDEAKFKQLFPESIDLYTFAGLVDAAKKYPSFANTGNEVNDKRELAAFLAQTSHECDHYKAAEEYAKDTFPESQYCNAGQVPCAAGHRYHGRGPIQLSWNYNYKAAGDAIGVDLLNKPELVGTDKTVTWQTALWYWMTPQGGKGIIHDVVAKDDGFAQSTNIINGGLECGGPNQSNELQRIEYYKKVCAALGVEPVSKMSCN
unitig_80	g14458	926	unitig_80:314137-315063	SP(Sec/SPI)	GH19(105-306)	GH19	N	2	MKIPQLLSAIALSAFVAETVAADGYEYVGSTGDKTAMTQWCNWNCPSYCPTDICKATGGSSTTSTTTAPTTAPAVTTAPATTAPAATTAPTTAPSTGTGSGFSSYLDEAKFKQLFPDAIDLYTFSGLVDAAKKYPTFASTGNEVNDKRELAAFLAQTSHECDHYKAAEEYAKDTFPESQYCNAGQVPCAAGHRYHGRGPIQLSWNYNYKAAGDAIGVDLLNQPELVGTDKSITWQTALWYWMTPQGGKGIIHDVATKDDGFAQSTNIINGGLECGGPNQSNELQRIEYYKKICSALGVEPVSKVSCNA
unitig_80	g14459	926	unitig_80:315458-316384	SP(Sec/SPI)	GH19(106-306)	GH19	N	2	MKIAQILIAAAACVAFAAEEVSAVPKCTVAPSPSATSAPSKTPAPSSGAPSKTPAPSSGAPSKTPAPSSGAPSKTPAPSSGAPSKTPAPSAPGNTTAPSTGGFAKYLDEAKFKELFPSAIPLYTFSGLVDAASKYPEFANTGDELDDKRELAAFLAQTSHECDHYKAAEEYAKDTYPETQYCNPKEIPCTAGKRYHGRGPIQLSWNYNYKNAGDALGVDLLNNPELVGTDKSITWQTALWYWMTPQAGKIIHDVVAEDFGESTKIINGQLECGPDAVAKKNEEQRIEYYKKVCATLGIEPVEKMSCNA
unitig_81	g14222	1439	unitig_81:103902-105341	OTHER	GT71(91-346)	N	N	1	MRRDRNTASRSPQAALKVLGGLILVIALFSLLQLGSITGSVSTATTNNALRENTPEPTTKAPTETPKQEQKKEPEVPVIPEPVVNVKTGSKGIIMCLHNRLIPLGASLIRELRCLGNNEPIEIYQCNNELSKSNIDLLHAVDSNLRIIDACKSLVDRGVFNEQLANTFRSYWIKPLALHQTEFDEVILIDADDLLLKDPAKLRDIAGYKEKGTVFFYDRVIRDANFFNRWYEPSPGAKKVHYLPYWLEHFDYERFGIPKTPPSQHVLKSDAYNDRTCHEQDSSLVLIDKSRSGKAMAVLWFLITEQRFRVEFSLGDKESFWLAYEFARAPYFFSPWGASVISSQPNGDVERYEATLCGSLCHYNPVEDNTPELLYINGRAALDFVPFNLEDVGRLRRNL…
unitig_81	g14333	2843	unitig_81:379043-381886	OTHER	GT96(518-635)	N	N	1	MLPRRQQSATRGRLPHAQSTFTVRRAILLALALVFVLAVYLNFQFLTNARLESSSSSHSSPLKPKTKSDYMHQSKQQNGKKTSAQQKALSEQLAYESRAVQHIVFTSGCADADFVHSEVLAHSARASGFAKRISHLVYGCSVPVIEDWIRRKNPKNDVETMGFPAITSETTMFGEGQLNTTIHPLVVHQWFKQELNRNVLKDDDFVMIVESDAVFTKNVDIWNLFREVDDIQDPRWFGQDAAWYWPKRSPIPQEQIERAVPAKSKALHVTEWREFAATGPYVVEVALLREVLPTVVDIWDKLDVTKRYMAFPLAGAHHAVPIGISGVLSVHNYPSRYENWDFVDDIKHNPCNESAGKDVELESYPITIRPQNFTLPQWIDGNEWNFFNQQIPPQFLQCD…
unitig_85	g14515	1579	unitig_85:49566-51145	OTHER	GT33(1-413)	GT33	GT33	3	MQYHALSLARMDPKLRVSLLGYEGERCVPDIYAMPNIDFLTFQPRMQRISRKLFVLLAPIKVLVQLFQLFWILLFTAGSIDLVLLQNPPTIPTFVVVWLCCRLKGANFVIDWHNLGYSILALSLGDRHPLVKFATWIERVFGRKADANFCVTKVMKTWLWENWRIKATVLHDKPPMFFKPTPLDEQHDLFRRVGDQLSHCNDLVEWEKNDEETILTRKPRGQRNIQSREDRPAIIISSTSWTADEDFGILLSALTTLSGRTAELSVEEFPNVLVIVTGKGPQKEMYLERIRQLAFKRIRIATMWLEAADYPSVLGSADLGVCLHTSSSGLDLPMKVLDMFGCGVPVCAVGFKCLSELVQHGRNGLIFDTSDQLADQLQDLLKGYPRSTPLLTKLASSLE…
unitig_85	g14536	2918	unitig_85:113401-116319	SP(Sec/SPI)	GH31(381-841)	GH31	GH31	3	MRGRLALLVAALWTLSVDAVDRSKFRTCDQTQFCKKHRFGRHAAFDVVAASVAQDGDTVRFELQDPQQPLPLQAKLQFVLDAETSTTPAVRLHVTEKWTDPNDPKKRWENQDVIMAAASATRGVQAISVAESGLDVKGDVRLFTTTEESKAASIIVALRLAPFGVDVYLNKEKVMTTNAEQQFHYEVRRDRTAAMEDTATPAEAEVDVHEGKTIVDYGEDGLAIYSDGTTQKKAEPASAPAPVTSNEGWEESFGGSTDKKKFGPSSIGLDIAFYGQNRGLYGIPEHASDFLLKNTVETKEGEEPKVLTDPYRLYNLDVFEYELDVPMTLYGSIPVLVAPDAKSTVGVFWHNPSETFVDIETKADGSKKSHWLSESGVLDLFFLVGSEPADFFAQYTSLT…
unitig_91	g14717	1811	unitig_91:109500-111311	OTHER	GH5_20(136-483)	N	GH5_20	2	MSRPSMSNRSSEVERIIAAAEVDTTFAGKKAIRYRGRRSTWPGALGLFVIFAGTIAGLVYYGIQEHEAVNDVLASDAAIRQRWGYGTVIDDGRPVGNVTEDIDVVNPEEYVDRKCEQPNYISKNGKIYASFTGGKEVQLNIKGVNWLGMEVSAGVPKGLWDNSREGSTLYRVGQFLSNNKFNAVRLPLSIDAALRNTEITTNLVNTNSNRALAGATRYRSFLGLIVQGLGTFNMSVVLDFHVLSALSKDADGLWYGTSIQLNDIKEAITNLAMDLCNSKYYNIMGIDLKDGLSKTATWGDGSNTDWAAAATTLGNHVVKECPKWLAFVQGVEGSSHKDKYDGDREIKSKFFAGSDLSGVKDSPIKLDTSNKLVYAPKYWTSSYLPMAYFFDSGEPKGDM…
unitig_9	g3584	1278	unitig_9:31781-33059	OTHER	GT2_Glycos_transf_2(78-219)	GT2	N	2	MPSEQLSQALLVTCASVFSVGAVVFLRWFLAPIADANRLAKESDPAQELTFEDPNDTNDKTKHHRFGSLADDATRSLTVILPAYNEQDRIIETIRDTVKYLDERKKTDASFSYEILVVDDCSTDRTVEVVQTEIKTYTVDRIRLLRLMKNHGKGGAVRKGVMRALGERILFADADNATEIRDYAKLESAMNEAKIEGVVVCGSRAHLEEQAIAKRHPLRNLLMHGFHVIVSVLGVKSIRDTQCGFKLFDRAAARLVFAPMHIERWAFDVELLYVAALRSLVVKEVAVQWHEVPGSKLSVVSATLTMLRELILIRLCYTFGIWRVEDGGFRLSRIL
unitig_9	g3587	1793	unitig_9:36053-37846	SP(Sec/SPI)	GT1(110-498)	N	GT1	2	MPIGRDASTRLLLLVLVQYAICYADIATDHVSSSSGLSMSEEISCSVDDRTCRRHATDVHEKHVLFVSIAIKSHALPLLRIASEMKQRGYSVSFATHESGREWVLSHGLAFVSAGAFPISADDLRAKLKTMTWDSSNFRGILTMFNDIYVAAARPMFDELLPQLQDQPPALIVMDIASIGAQDLAHKLGVAHIVNSPTIMFDLGGAPSYVPAWGTGFSTHMSLWNRCLNLLFPRLLSVALTPPFMQLNKMRWELDLKPYRSQHDIFKGTRVLLNTAFGLEHPQPLSPLIEPVGPILPVNTSHSQPHMNSALSSWFQKHGETSHPAEDEVVVYMNLGTLSYIDAWQAEALVDGLTMRTDAFRLKVLWVLPSDQRNVLPINMPPTFKVKSPNVVSSLDVLA…
unitig_9	g3595	851	unitig_9:52234-53085	OTHER	CE1(21-278)	N	N	1	MQLLKQTHAFGGVLKQFSHESTETKCVMKFHVFLPPQASETHKVPVLFFLAGLTCDDERLFMKAPNAMKVAAARGIAIVATDTSPRGVNIPGEDDGWDFGSGAGFYVDATEPHWKDHYRMYSYVTKELPALLAANFPISTERQAITGHSMGGHGALVLGLRNPEQYRSISALAPISHPTQCPWGIKAFTGYLGGDQEAWKAYDATLLLLKNGAFPREILIDQGLDDQFLQDKQLLVDAFEAASKEVGQKVSVRNHEGYDHSYYFIASFIEDHVTFHADALLEE
unitig_9	g3675	3428	unitig_9:231774-235202	OTHER	GT20(255-751)	N	GT20	2	MSDRLPTEREHDGKRPPLHPASFPPEKRGRPHPPADADESMERDEDEQSASGVLSDSGYSSPRQFPASRSTSTSSIGDVNAGTYTRVHLKIKAETRFGESVHCSGSSLIMGQFNPNESMTLVTTPEEYPYWTTIKPLILPRGVPHQYMYALFSGGVFNSWEPIDSERVLVPEGREMVVVEDFGVYDRETVLVPNGELSERAVVFDRKKLTEEHGEEETSTEGALSRTSSQHIRQNKLQSRYKRYTPSNYHPDPQATLYLVCYHLPVRLKKSPVDGSWSAEWNRDSLISRTEGSIAESMKARWVGCVTYQARSDSEDLSDADKQEITDILFKMDCIPVFIDRELAYDHYQGYCKSKLWPMFHNVDILDIYSSVWDRGEVTEWKEERNNGKRWEAYQKVNQ…
unitig_9	g3677	2174	unitig_9:236598-238772	OTHER	GH37(168-716)	GH37	GH37	3	MPPSVETLRCLNPVLEERFPVQKCGNCVEEAVVNEEEICLCPKEGETSGQVSRGGVRVRAKASTLGWWLSQCTLRRMAPVLVMALLLTTVWVSVKRTFPLPKTQPGVRYHAIPWHRHRPRARSSKTLPLMPPFTFDPAQLSLDAQTERIMDIYCRGPLLHAVQMANVFPDSKHFVDMPLKQNTSVFDVLVDFQRRQLALTDFQPDNELVPHVQRLHAFLDDHFDPPGADMEPITPFDYQEHVTPPLVAGIQNAELREWALALHRLWRHLGRMPKKHVTSSFLHAKPLKDVHLHRKQNVLIVPGGRFRESYYWDSYWIVHGLLVSNMKQTARGIVNNLLEYVAEFGFVPNGGRVYYLTRSQPPMLSDMVKLVARVDEQNAQRVTYDVSYLRSVVPILEQE…
unitig_9	g3685	1802	unitig_9:251658-253460	SP(Sec/SPI)	GH37(47-594)	GH37	GH37	3	MKWGLIAGICAAAASPLVSAEGATLEQLQTIFTKGDLLDAVQRHKLYEDSKHFVDMPIKANSSAELILSEFDAIKPLLPEVPTNGSTDLLKAFVDMHFDDPDAFLLPVEPTDYVDSPLPKAIDAIKDEKYKAWAVHLHKFWKVLGRKPNDKVSSTYLHPKNVPELNTNGQAEEETLIVVPGGRFRESYYWDSYWIVEGLMVSDMQTTARRLVKNLLEYVAEHGFVPNGGRIYYLNRSQPPLLSDMVRLVAKKATSGNGNQGPVQGPVQGPVQGPGDKSEWDLEYLRKVVPILEKEYDTWMKSHSTTITVDKETYTLNHYTSAWGAPRPESYREDKSLAETKFGKDSGDSAEKTLFYNDIAAAAESGWDFSSRWFRDQKTLGSIMTTDVVPVDLNAILYK…
unitig_9	g3686	1973	unitig_9:254695-256668	OTHER	GH37(127-652)	GH37	GH37	3	MMTPKDSKDAHTEIDGATEATTLLMRSPADAAPYLERAENEPDAMLPARGSRRAKAFAIAAFIMTILACGAVAIAALAGRENDTSVVAAASAASVNEAVHMPATTEQLHNIYLKGDLLDAVHRHKLYPDSKHFVDMPIKANSSPELVLSDFETLKPLLPEEPTSGSTDLLQAFVDSHFDNPDTFLLPVEPADYKDSPFPPEIEGIKDEKYKAWAIHLHKFWKVLGRKPNDQVASTYLHPKNVPELNINGQTVEDTIIVVPGGRFRESYYWDSYWIVEGLMVSDMHITARRVVKNLLEYVAEFGFVPNGGRIYYLDRSQPPLLSDMVRLVTNNKDDWDLEYLRKVVPILEKEYDTWMTTHSTVVTVDKESYTLNRYTSARGAPRPESYREDKLLAEAKFG…
unitig_9	g3696	3190	unitig_9:296603-299793	OTHER	GT60(294-587)	N	GT60	2	MSWPTRFREPARAVTEALDEVESPGNYYATGASDEYPQPGLHVDGLDLEGFPLSASSVKAIINKSHLAPYGHGEETIVNTQVRDTWELNAQTQFTLQNPAWQHFIDRITAACARDLGIDPTTHNVTAKPYKLLIYETGGKFEKHQDSEKEHGMFGTLVVVLPSVFTGGELVIHGPAGRQTESFTWDPSVGTRRTQHSESCKRDTMSYQPYGRVSARDRDRRRAGWDMRFGILMVFPVICLVVVLYEFLYLQQFTASEAQEAAALQEFAATTAAPTQDRIVRLRTEPSVTPSPAPTCSETLRSIFDNAVFPDLLKISIFDQIYLPEGEKPCIETFCELVGEAKCRRSQLVATQIDALVATGPTAARYETEKAITDEDFCLAIDSHLVFVNKWDERLIAQW…
unitig_9	g3822	1421	unitig_9:641217-642638	SP(Sec/SPI)	GH15(53-461)	N	N	1	MVFAAIKNLIFASAVAAACVSAQETGFQTDVTEYLKGGQDLYKDYLLANISPKHVDGALPGSIIAATASGANNYIYHWIRDSGLVMDVVYSLYKKGDKSLEQTFWDHATFTKKIQGLQTLEGLGEAKYNVDGTAFNEPWCRPQNDGPAVRASSFIRFANAYLANGGSLDKVVDLYNGTTGVIKPDLEYVTRVFNDDKNCDLWEEERGQHFFTTAVQRRAMHEGEEFALKLGDIGAAEYYALKATELDNKLKTYWNEQKSSLQTTLNARLHDAALPLGVVHGNLGDGLFAPQDDRVLSTIFQYAEGFINEYSLNQNTKVNAEGLPLSIAIGRYTGDVYDGSGTSKGNPWYLTTAIVAETTYRAATAFAKAGSITATDLNLKFFNGAAPAGLGLNIAAGKY…
unitig_9	g3823	1763	unitig_9:644180-645943	SP(Sec/SPI)	GH15(167-575)	N	N	1	MVFAAIKNVIVIAAVTAACVFAQEVKVGSYSFDGKTLTGSVKVQNLAFTKAVNIIYANAANTWGNTCKAAYKSGPDSSNKEEWAFNCPITAGITQFYAEYQVNGLTYYDNNGGYGNNYKVTPTTTPTPTSTATPSPVTPGFQADITTYLDGGAATFKQFLLANISPKHIDGALPGSIIAATASGANNYIYHWIRDAGLVMAVVHSYYQNGDKSLEQTFWDHATFTKTIQGKTTLTGLGEAKYNVDGTAFNDPWCRPQNDGPAVRASSFIRFANTYLANGGSLSRVVDLYNGTTGVIKPDLEYVSKNFNDANNCDLWEEQRGQHFFTIAVQRRALHEGVEFAKKVGDTGAAAYYATQAAALDAKILTFWNSGAQSLQTTLNARLLDAALPLGVVHGDVGD…
unitig_9	g4045	4918	unitig_9:1253432-1258350	OTHER	GT24(1339-1584)	GT24	GT24	3	MAMTRRSTCFQRLVTPLLTLYALSHVALVCARGINVNLTATWPSSPLYPLLETSEFLAEENPKLFWRFVDTLAAHKSAIAKKSEDADALTQFAVDLAQEVAPNTKNILELTVATRMYSVRVEMFRQLGLDSGSRLCGPDAEAWAVFYQTKRCVTAVACSPDEITAALATLESDSSQTCLAAGMNDVELEVDHKYPQSGDVTKSTVILYGLIGTSSFYKFHDEFASLAKQGEVTYIARHFPKDAPLGTALQGYGIALDIKNMEYKTIDDSKKANEEPEAGEEEEDEFDTAEDDDEDTEAEEDVDGLFFSTLIKNHGEIEQEIKEFRDALVQQHDQEQDIKAWHLKNIGIAAAREILDSKNPLKRLRVLSQDFPKHAKKLAFSRKPLSDELRQEIELRRTE…
unitig_9	g4046	2813	unitig_9:1258554-1261367	SP(Sec/SPI)	GH55(21-757)	GH28+GH55	GH55	3	MAARSVLLVTVLAAFVALCQGAYWLEGIPHKGVASFHPNATTYQVFRNVKDFGAKGDGVTDDTAAINAAISSGNRCAEGCDSSTTVPALVYFPSGTYVVSKPIIGYYFSQLVGDPTNKPVLKATADFTGIAVIDANPYTANGNWYFNTNNFYRAVRNFVIDLRATPEGTGIHWQVAQATQLQNIVFEMGSTQSQGVFIENGSGGFVSDLTFNGGKLGAFFGSQQFTARKLEFNGCQKAMQLAWNWVWTFKSLSINNCQIGVDMTAAGVGSIAIMDSSFTNTPTGLLVAALTDTDPKPANSVAIDNLATNNVTTIIANSAGTVLRAGSSGKIKVDGWARGYQIDYATGSAVENTIQGDFVPFQKPSSLLKDGKILERSRPQYEDVPASQFLSAREAGAKG…
unitig_9	g4047	2624	unitig_9:1262263-1264887	SP(Sec/SPI)	GH55(20-759)	GH28+GH55	GH55	3	MTARSVLLGTVLVVCATLCQGAYWLEDIAHSGVAPYHANGEAYQVFRNVKDFGAKGDGVTDDTEAINAAISSGDRCALGCDSSTTTPALVYFPSGTYIVSKPIIAYYFSQLVGDATNKPVLKAAANFQGMAVVDSDPYNGAANWYYNTNNFYRAVRNFVIDLRDTPSGTGIHWQVAQASQLQNVVFEMGTTQSQGIFMDNGSGGFMSDLTFNGGKIGAFLGNQQFTSRNLVFNGCKTAIIMNWNWAWTFKSLSISDCDVGIDMRQAGVGSVLIMDSSITNTPTGMIVSSSVNETALAAGTLTIDNLVTKNVLTIVASSDGKALKAGSAGDLTVAGWAKGRSIDFTTGRAAETTVKADFDPFQKPAALLKDGVLFERSRPLYEDLSASSFVSARAAGAKG…
unitig_9	g4048	2828	unitig_9:1265233-1268061	SP(Sec/SPI)	GH55(24-759)	GH28+GH55	GH55	3	MPGQRSKTSVLVALLLAACMAVCQGAYWLEGIGHNGLAPYHPSGSAYKVFRNVKDFGAKGDGVTDDTAAINAAISSGTRCELGCDSSTTTPAVVYFPAGTYLVSKPIIAYYFSQLVGDPTNKPVLKAAANFQGIAVVDSDPYVGEANWYFNTNNFYRAVRNFVIDLRATASGTGIHWQVAQATQLQNIVFEMGSTQSQGIFMDNGSGGFMTDLTFNGGRIGAFLGNQQFTSRNLVFNGCQTAVIVNWNWAWTFKSLSINNCQVGVDMRNQGVGSVVIIDSTIKNTPIGVIVNANSDVNPKSSNTLTIDNLVTNNVPKIVATPTGTTLKAGSGGAVTVAGWIKGRQIDYSTGSAVETTVQGDFTPFQKPANLLTNGKLFERSRPQYESLSASQIVSARAA…
unitig_9	g4049	2330	unitig_9:1269397-1271727	SP(Sec/SPI)	GH55(25-765)	GH55	GH55	3	MTERHSSKTTVLAFVLVSACMAVCQGAYWLEEMAHSGIAAYNANPAAYKVFRNVKDYGAKGDGVSDDTEAINKALADGGRCAFGCDSSTTTPALVYFPSGTYVVSKPIIAYYLSQLVGDAVNKPVLKAAANFEGMAVIDSDPNQNGTNWYYNTNNFYRAVRNFVIDLRATKASTGIHWQVAQASQLQNIVFEMGTTDSQGIFMDNGSGGFMSDLTFNGGKIGAFLGNQQFTTRNLIFNGCKTAIVMNWNWAWVFKSLTIKDAQIGIDMRTAGVGSVLIMDSSISNTPTGIVVSTTVVQNIQAIGTLTIDNLVTKNVPKIVASPDGEVLKAGSAGDVTVAGWARGRSIDFTTEKAAETAVKGDFTPFQKPKALLNKDGVMFERSRPLYEDVPAAKFVSAR…
unitig_507	g5524	935	unitig_507:1245365-1246300	OTHER	N	CE4	CE4	2	MAPQPPRDLVGYGRHGFDPKWPGGRRLAVQFVINYEEGGENCILNGDQASEHLLSDIVGASPYQGERHMNMESLYEYGSRVGFWRLHRLFTERKLPVTVYAVGLALEKNPDAAKAMVEAGWEVASHGYRWIDYQNVDEATEREHIRKTIEVHERLVGKRPVGIYQGKPNVNTRRLVVEEGGFLYDADAYSDDLPYWNYDFGRPHLVIPYTLNNNDMKFVAFQGFNSGDQFFTYLKDAFDVLLAEGRNGSPKMMSIGLHCRVVAHPGRIAALVRFLDYINTFHDEIWVCKREEIARHWYKNHYPQVVGVAKL
unitig_507	g5123	1352	unitig_507:271749-273101	OTHER	N	GH0	GH0	2	MHTSQALATLRRSRTANSNEPLDGGFRSLSGDNHALRRSFPTERQPLIPPKRILSCENGRQSSSSFSPDVSNKRSVSKPTWKEDANAIFHFLVHQKLNVMLLTAPFALWASLAHWGDTWIFLLNFVVLIPLANMLGEATESLAFHTGETIGGLVNATFGNAVEVVVAVLALSKGEINVVQSSLIGSVLSNLLLVLGCSFIAGGFAKKENSFNAVGASANSTLLILASFAMLLPSYIFYFSGSDSEESRVEKTLALSRVAAIFLLFMYMQLLYFQLFTHLHLFQGEGGEDEEVDLSKRASLIVLLSSTLLVALFSEYLVGSIDGFASELNVSKSFIGIVLLPIVGNAVEHVTAIKVALHDKMELAMGVAVGSATQVSLFVVPVVVIAGWIMGRPMSLAFP…
unitig_3	g2797	619	unitig_3:1936024-1936643	OTHER	N	GH5	N	1	MDGEVGNPTEYPDMGCALPNYVSRNGKIYVIGPQGRTEALTIKGVNWFGMETSATLPLGLWSNPQTGTTAYAIAAFLARNNFNSVRLPICVESLVKNIAPNKDIVNQYENRAIQLNTHLNPLKGIIKALGHRQISVMISLHTLNHV
unitig_26	g7143	2216	unitig_26:699573-701789	SP(Sec/SPI)	N	GH16	GH16	2	MPRQCRTLVLSLAVGIFTAHGVSVEYPTKSGIKTWVDPNTPDDRQVYTTSRGRKWELVMSDEFNEADRNFKPGHDHIWTSLEKPDGVNSALETYSHNMTSTKCDDDGTCYFYIKIVDDHQQLRVYNMYLNSPAYETVEFFYRAGMVQSWNKFCFQGGMVEVRAQLPGAVSSKSRNPDLSKGNSGRASTIDYYPTWPGIWMMGNLGRAIFSGSTSRVWPFSYNECNPDVFDSKNQRISACDDNPGYGLNPNQGRGAPEIDILEGGGTDISSSLQVGPGMPTKFRVISPDPTIENAYCIYSGDCKTPGANHPGVPSATYNKRGYKSWYQGLRYAANPFCASDSSKKQDYTTVAASVKTGITKNTCDVTNCPGSKDGYADLGLIDDVGPGHWGVNSNGTCFP…
unitig_43	g9337	6879	unitig_43:932207-939086	SP(Sec/SPI)	N	GH16	GH16	2	MVDLVRCVAFLAASWTLQVHAGSQQEYPIKSGIKMWVDPATPSDRQAYTNSRGRTWELVMSDEFNEPGRDFRPGKDHLWTSLEKPDGVNGAKELYSHNMTSTECDDKGNCYYYIKIIDDPQSIRTYNMYLNPPAFETVEFQYRAAMVQSWNKFCFQGGLVEVRAQLPGAVTPESGNPDLALGPTGKTKSIDWYPTWPGIWMMGNLGRAIFSASTNRMWPFSYDKCEPDVFDPDNQRISACDSNPGYGLNPNQGRGAPEIDLLEGGGTDISSSLQIAPGMPMDFRLVPPDGKKEKDGNIYCLYSGECKTIGANHPGVPSSFFNARGHKSWYQGLRYSTNPFCASDPAKKQNYATVAASIKAGIKDNVCTPATCPGSKDAYADLGLIDGTGPEHWGINTNG…
unitig_43	g9322	2228	unitig_43:893007-895235	SP(Sec/SPI)	N	GH16	GH16	2	MARVQWWRLFSVATALLTAIEAAEFSTKSGLRPWVDPDTPEDRQAYVSSRGDTWELVMSDEFNQPERSFRPGDDHMWTSLEKPDGVNAALEYYSHNMTSTLCDDNGTCYFYIKVMEDETVLRVWNDYQDVPGYKTVYFYYRAAMVQSWNKFCFQGGMMEVRAQLPGAVTPESGNPDIKGGPSARATTKLYYPTWPGIWMMGNLGRAIFSASTNRMWPFSYNECDDSVFPSANQRISACDPNPGSGMNPYQGRGAPEIDILEGGGTDISSSIQAGPGMPTDFRAIFPKDDDNSGCIYDYNCVTKGANGPDVPTKYYMSKRGHKSWYQGLRYAANNFCQPNGKYKQDYETVAASVKAGITVNVCDLETCAGSKDANAEIGLIDGVGPAHWGINSNGTCYPV…
unitig_43	g9323	2195	unitig_43:895783-897978	SP(Sec/SPI)	N	GH16	GH16	2	MAPLSPWLLSLTALSLVTATEFATKSGLRPWVDPDTPEDRQAYVSSRGDTWELVMSDEFNEPKRSFRPGDDHMWTSLDKPDGVNAALEYYSHNMTSTQCDGDTCYFYIKAMEDETVLRVWNDYQDVPGYKTVYFYYRAAMVQSWNKFCFQGGMMEVRAQLPGAVSPESGNPDVKSGKTTRATTKLYYPTWPGIWMMGNLGRAIFSASTNRMWPFSYDECNDAVFKSSNQRISACDKNPGSGLNPNQGRGAPEIDILEGGGHEVSSSIQVGPGMPGDFRPFYPTDDAAGGCIYEYNCKTKGANGPDVPTKYYMSKRGHKSWYQGMRYSANNFCQPNAKYKQDYETVAASVKAGITENSCDVTTCAGSKDANADISPIDGTSDYWGINSNGTCFPLMNAYT…
unitig_53	g10394	2198	unitig_53:137941-140139	OTHER	N	GH16	GH16	2	MTPSLLDSRFTRSMNVLLAFSAFSATQASEFISKSGLRPWVDVNTPKDLYNVTSSRGDTWELVFSDEFNVPGRDFSAGKDHVWTALELPDGVNAALEYYSINMTSTVTEPDGRGVFQIEAREEPNVTFTVFNAYTRPPSFQTYSMYYRAGMVQSWNKFCFQGGFVEVSAKLPGAVSASSGNPDLGNNKARVENIDYYPTWPGIWFMGNLGRALFTSSTNRMWPWSYDVCDDTSRTNQRISACDSNPGHGLNKNQGRGAPEIDLLEGGGVDVSTSIQIAPGMPDKFRMISPAGNEEGCFYGGNCKTVGANFPGIPTATYEKRGYKTWYQGLRYAPNTACQSESSEKQDADAVIASVKKGITDNTCSSLNVCPASHDGNSDLSLIDGKGTKHWGVNEAGGC…
unitig_43	g9339	2225	unitig_43:942013-944238	SP(Sec/SPI)	N	GH16	GH16	2	MKVDAAVLGLLASSWGYGVVSAYKEYPVKSGMKIWVDPATPKERQVYKSSRGKKWDLVMSDEFNEPGRDFRPGKDHIWTSLEKPDGVNGALELYSHNMTSTKCDDDGTCYFYIEIVDDPQTIRTYNMYLNPPAFENVEFHYRAAMVQSWNKFCFQGGMLEVRSQLPGAVSKNSGNPDLKGGPSAPVETIEYYPTWPGIWMLGNLGRAIFSASTNRMWPFSYDKCDPDVFEPSNQRISACNKNPGFGLNPGQGRGAPEIDLLEGGGKDVSSSLQIAPGMPMDFRLFPLDKTETGGGGCMYTGTCTTPGANHPGVPTAVYNKRGHKSWYQGLRYGANPFCKSDPSKIQDYKTVSSTMKAGITKNTCGVDNCPASKDGNAEVSLIDGVGPGYWGINSNGTCY…
unitig_43	g9363	2231	unitig_43:1008037-1010268	SP(Sec/SPI)	N	GH16	GH16	2	MKLDVAILGLIIASAWDHGVVSAYKEYPTKSGIKMWVDPATPTDRQLYTNSRGRTWELVMSDEFNEPGRDFRPGKDHIWTSLEKPDGVNGALELYSHNMTSTKCDDDGTCYFYIEVVDDPQTIRTYNMYLNPPAFQNVEFYYRAAMVQSWNKFCFQGGMLEVRSQLPGVVSKNSGNPDLKDGPNSRVNTIGYYPTWPGIWMLGNLGRAIFSASTNRMWPFSYDECNPDVFEPSNQRISACNKNPGFGLNPGQGRGAPEIDVLEGNGLDVSSSLQIAPGMPMDFRMFPPNAKSENGNTGCMYTSTCVTPGANHPGVPTALYDKRGHKSWYQGLRYGPSPFCKPDPSKVQDYKTVYNTMKSGITKNTCGVDNCPASKDGNAEVSLIDGVGPGYWGINQNGS…
unitig_0	g383	2466	unitig_0:995246-997712	SP(Sec/SPI)	N	GH16	GH16	2	MWRRVPELLATIVAVSLSPWTAVDASTVGNVVSDTTVSHPETDSGSGSGSGYGSFVNQTRYEINQYRTLSGILPWVDPTTPDNRQSYTSSRGDTWQLVMSDEFNVVDRNFTAGKDHLWVSLDKPDGVNGGLGYYAHDMVDIKCDKSDNGSDVCYLNMKVESSVTNITVYNQYSRPPGFQNITFFYRAAMLQTWNKFCFQGGMLEVRAQLPAVVDAKYKNPDMGKGPNARTTDIDYYPTWPGIWMMGNLGRAIFSGSTRRMWPFSYNKCEPKVFDPSNQRISACDSNPGHGLNPNQGRGAPEIDLLEGGGLAISSSIQIGPGFKKKFRMIDVNETYAEGEFKYCIYNSNCATPGANNPNVPTALYKKRGYTTWYKGLRYGTNGFCAPMAKFKQTYDQINA…
unitig_43	g9324	5084	unitig_43:898241-903325	SP(Sec/SPI)	N	GH16	GH16	2	MKPSVWTPLLLAAVVTHAAADDDGRAASGLRIWVDPDTPADKHSYVSSRGATWELVMSDEFNSPGRSFRPGRDHLWTSLEMPDTVDGGLSFYSHSMVTTVCEEDKTCVLRIGASTKARNESVYNENSDPPGYQDVTMYYTTGMIQGWNKFCFQGGMVEVRAQLPGALSNTSQNPDLKGDASDRVSNTEYYPTWPGIWMMGNLGRALFSASMERMWPYSYDRCEPDVFDPKNQRISACNEDPGFGLNPSQGRGAPEIDIIEGSGLSLTSSLQISPGMPTDFRRISDQNDSCSYNASCNETGANQVGVPTEVYASRGHKSWYQGLRYGANNLCAPQENATQSYDTVKASLEAGITENSCDLSICPASFDVNSDLTEISGSGSQRWGINANGTCYSRMNPQM…
unitig_43	g9353	2275	unitig_43:975694-977969	SP(Sec/SPI)	N	GH16	GH16	2	MKLDVTILGFLVASSWDHGVVSTYKEYPTKSGIKMWVDPATPTDRQQCTNSRGRTWELVMSDEFNEPGRDFRPGKDHIWTSLEKPDGVNGALELYSHNMTSTKCDDDGTCYFYIKVVDDPQTIRTYNMYLNPPAFQNVEFYYRAAMVQSWNKFCFQGGMLEVRSQLPGAVSKKSGNPDLKDGPNSRVKTVGYYPTWPGRGAPEIDVLEGNGLDVSSSLQIAPGMPMDFRMFPPESVDCVYTANCRTPGANHPGVPTALYDKRGHKSWYQGLRYGPSPFCKPDPSKVQDYKTVYNTMKSGITKNTCGVDNCPASKDGNAEVSLIDGVGPGYWGINQNGSCYPMINGYTGAYLCDPDNQHESCAKPRPDDQPKSNIMDPFNYQIDAISSNWHLHLGAYLDY…
unitig_26	g7147	605	unitig_26:707671-708276	OTHER	N	GH16	N	1	MYTSSRGRTWELTMSDEFNEPGRDFRPGKDHIWTSLEKPDGVNAALEIYSRSMTSTKCDDDGTCYFYIETIEDHQVISVYNMYINPPAFVNVEFFYRAAMVQSWNKFCYQGGMVEVRAQLPGAVSKKSGNPDLAEGPSGRASTVSYYPTWPGIWMMGNLGRAIFSGSTSRIWPFSYNECNPDVFEPKTSASMLVMAILAMD
unitig_2	g1087	797	unitig_2:130735-131532	OTHER	N	GT1	N	1	MTSTLVTTGVALVLTALLVLLRIWLVIVPQRIKVSQKAYATVHDKKQPTTKHTVMTMVVLGSGGHTTEILKLMKKMKRDVYTPIVFVVAETDKTSREKTMIDFKPSAQDSFVIIPRSREVGQSWSSTVWTTLRSFLVCLSEVYHHRPELVLCNGPGTCIPICAAVLLFRFLGLQRQSKIVFCESFARVQTLSLSGKLLYYVADEFVIHWPQLQAAYPKTTHLGVIC
unitig_65	g12057	3119	unitig_65:261438-264557	OTHER	N	GT2	GT2	2	MTSRNPHLRINEDEAYTPNAGYHEQMTDRAMYHDAIGQKESQRFLAPQATLSHQLSASQFEAQKVITELTKAEEAEALGRITVHGWMHKQGARKFKGPVAKSWRKRYFALENNKIYYFHDFVDCRKFFNSRNGELVVGAIDLRDAFKLEQSERLDLPARGIAIHTRHRVWLLCPETEPDFEMWFDALEFTIMNSGSGNVVKRELPNVRSYEMKGRSSYRFWYIIFVITSLIELAGIVLWFPLGIEPCEMRLKFETCDTIQLTRAEKIQCGPEPFNGAWSPPDWYKWSAGIKEVQCFREPVIAHWVSYFMFYFAEFISIFLGFLYYLGMWKPVRRGAQYLRDFKPHFAPSKWPTVDILLCHYSEPTEDTIATLDKIMNLDYPPHLFHVWICDDGYCKAKW…
unitig_4	g3004	2361	unitig_4:525693-528054	OTHER	N	GT4	GT4	2	MLRRREWLQSRAVRRRCTPFQRRQSTQTTTAGLDSLIAYGERVLKTPEPSEKVRLTHEAYAQWLRGGLPIWSGDVWRSDPPPQPARSELPVLYAPKVMPSPKDMDAPIPVIMLHALAHIELGAIDNYWDTIVRFDPHKYKLPRPFYEDFLTVADDEARHFTMVDDRLRQLGSYYGDLPATLALLEHAANTTEALAARIAVVPLVQEARGLDSGERLVHKLQSVGDKASAKIVEQIVFEERNHVSCGIKWFQHLCGNVLPEGTDPVSYFHELVLHYFPDGLPGPFDIDARLAADMPPAWYQPLEAKTRHYKGTARDPTVSASSSSQRLAAFASGKKKIVLAGSVWPERTSSAAGVRSSDLIAIFQAHGYQVLCVSPSRLNEHTERLGQEHNVHCVQADAN…
unitig_80	g14447	2968	unitig_80:291598-294566	OTHER	N	GT41	GT41	2	MASYARNRVAATPSPLNAANAPTAHATDPMLMDASTQRFTYLYNMAHQQYSMGFYEEALRLCEQLYETDAYRTENLLLLGALHFQLGNYSECIFYNQQCIRVDPNFAEAYGNLGNALKEIGDIMGAIQFYLKAIRLHPRFSDAYNNLANSYMQIGQISDAIETYKMALLLDPSLVDAHSNLGNLYKAQGRYEDAKMCYTEAIRVKPTFAIAWSNLAGVYKDVGHVELAIDHYHEAIRLAPDFADAHSNLGNVFKENGRVQEAIEAYKRAIAIRPEFAIAHGNLASAYYDAGQIDLAVHTFRHAIQLEPNFPDAYNNLGNALREMGQLEQAINCYRTALRLKPDHPHAYNNLGNALKDKGMVKEAIHCYATAARLMPQFAAAHSNLGSVLKEQGKLDQAL…
unitig_0	g20	1724	unitig_0:41332-43056	SP(Sec/SPI)	N	N	AA1	1	MGSSALFVFLLVFVVAIQLVCASNIRRYYWRVTQFPATYDGVTRLVYGINDKAGHENPIEVTLGDTVEVLVVNAIQEPTCIHWHGMKQFGTQEYDGASGITQCHIEPGHSMVYRFKPSEAGSFWWHSHDNTQYVDGLRGPLIVHDPKSDQSQVQSKPRVEDEYTVELTDWYHEQSAVLLAQLTDPVMNPSGNEPVWDTVLINNRGRFDCSKLNGSLVSLPCTNIQPLTRFMFQHGKRYLLRLINVAAFAAFDFSIDEHVFRVVAADGIPVQTSAPINSLIVNVGQRYDIVVDAHHPSKCEDNGDRFWMRATSLFGDPWTSLPPDQFPSGFNPNGLAIVEYSRQQQGQPDPASSPWDDGAKVTIPELGFKPLQTPELVTDPDRHIISFTMTSTEANPTVL…
unitig_0	g33	5804	unitig_0:64729-70533	OTHER	N	N	GT68	1	MRKNWLLKKKRPVRLLFEVFTPVILILLLAWIKAQTTEQNYLAGFGGDESDNDLFQPYGYTPAGSSYSPRYAIPETTLTGLLLYMARLSFDSNRDMQTFGDEKARAICERELVYGGRISLNKSSSYAVPSECQDHVSLYKLAIAPDNAFTRAYFFDTVKEWYPTLEINVTSNATLVVPSLEDSVVFYDTEEDLENYIKSATYGKTMEQPRIFGALVFNEFPGDASIGSYAPIDYSIRMNGTDTEVGFISHVPSTKSGDASTWFPFRRGVDTAAYKLYASGGFMTLQTLVTRFVNCMPKWDSKAKVSTGECQASSSLASASNDLDNRLLQTVKQDPSTKRALSELMGDRGMDTTIVKANSFDLPLSKGHREVLLKPLRQAPQPYLGATTSPFPSAAYSTS…
unitig_0	g34	6035	unitig_0:70930-76965	OTHER	N	N	GT68	1	MDTTELASPGHVLLQTPKGGDRPQEPPPSQQRQSNAFRFVPTLLWKNWWLKKKHPFPFLMEILTPVLFLVVLSVIKHQTTEYNVSPGFSDDNNANNLFSSFGYSLIAPLFTPQYVIPETTLTGLMLHMAKLSFVDARDMQMFVDEDAKVRCEHQVIYGGRVSLNQSSPYAVPKDCQGHVSPYKLAIAPDNAFTRAYFYETVKDWYPTLEINLTVNSTLVVPSFEDSVIFYDTEEALEEYVKSENYAKTTKQPRIYGAIVFNELPGDNNIGSYAPIDYSIRINATYVGRSDDEEKYYVPRTVFSDASSWWPFRRSLKTVSYIQYASGGFMTLQTLVARFVNCMPKWDAKTKSTKGECQATSSRAISSSALDDRFLATVAKDPATKQIIAEMTQDSSIDSS…
unitig_0	g35	5920	unitig_0:77864-83784	OTHER	N	N	GT68	1	MAEHVLMESPRSAGHNRQADQAKPNASHKRFVPILLRKNWWLKSKHPFSFLLEILTPVLFIVLMSIIKHQTTDTHVDAGFAGSNLFSSSGYSLVAPSFTSEYVIPETTLTGLLLHMANLSFANARDMQSFVDADAKARCQSAVVYGGRVSLDQSSPYAVPKDCQGHVSPYKLAIAPDNAFTRAYFYETVKDWYPTLQIDATSSATLVVPSFEDSVVFYDTEKDLEDYVKSESYAKTSDQPRIFGALVFNEFPSDSSLGTYASIDYSIRINATYVGKDQDERYVPRTISGDASKWWPFGRSVDTETYVQYASGGFMTLQTLVARFANCMPEWDAKVKKTTGECQATSSQAANSTSLNQRLLQAVLKDPAMKQVLSGLTQKMSVDSLDLQLNDATQESLLK…
unitig_0	g95	4322	unitig_0:218220-222542	OTHER	N	N	GT2	1	MDVGAEVEVLVDGVWTPGIIIDRYLSPIDVKGAVATVKFDDGTAREVSVAEDIYQSVPDVRLLQAKADEELDVDDLTSLMELNENTILAALEARFRNDKIYTNTGTILLAVNPFQKVRTLYDPTILLKYIESFEAQAAGAPSPPKRGSARRSSAAVARPRNPLPPHIYQVAGEAYRAMLSGLNGMLSDQSILVSGESGSGKTESTKFLMHYLAAQAGGASAEFNPMQSQSGSTNSQHGIAAKVLQTNILLESFGNARTLRNDNSSRFGKFIKLHFTNTGKLTGASIQTYLLEKVRLVSQSKGERNYHVFYEMSMGASPAQRKRWFLDAPAQNAMALAGDAGELPSEMRQYLYYRFLNQSQCYRRRDGVDDREMFQRVMDALEVVGFTPFEQTGIFDLLA…
unitig_0	g177	1238	unitig_0:445060-446298	OTHER	N	N	GH37	1	MSDATLTQYEDEDWKKTLKRPAKDTRVQTEDVTNVKGNEFEDYFLKRELLMGIFEKGFERPSPIQEEAIPIILAGRNVMARAKNGTGKTAAFIIPCLEKTDTSKKHIQVLILVPTRELALQTSAIVKEIGKHMGVECMVTTGGTSLKDDIMRLYNTVHILVGTPGRVMDLANKGVADLSQCSTVIMDEADKLLSPEFQPLLEQLLNHTAKSRQICLFSATFPVTVKAFKDKFIENPYEINLMDELTLKGISQFYAFVEERQKVHCLNTLFSKLDINQSIIFCNSVNRVELLAKKVTELGYSCFYIHAKMNQAHRNRVFHEFRNGATRHLVCSDLFTRGIDIQTVNVVINFDFPKNSETYLHRIGRSGRFGHLGLAINMITYEDRFNLYRIEQELGTEIR…
unitig_0	g500	3036	unitig_0:1333921-1336957	OTHER	N	N	GT0	1	MKDAVDIRALSKDPEDKKKQDAAEGKTKNPAEEPPKEEELSEEDRKLKEDLEVAVKRVSDPSEADGVKKLALEHLRREIRTSTSSMTSVPKPLKFLRPSYDTLKATYETFPAGSTKSDLADILAVLAMTMAKEGSRESLKYKLLGNSTDLGSWGHEFVRSLAGEVGEEYNARITAEGELEPNVSDLLAIVDAIVPFHMQHNAEPEAIDILIEVQQLSKLLDSGEIDEKNYQRVCLYLLACADYMSDPDDLLNLLNTAYKIFLRLEQYPDALRVALRLGSEEFVTEIFQKCQDAAVRKQLGYMLGRQRFFFEDDKDATVNDMIGNIDLSDKFLSLARDLDVMEAKTPEDIYKSHLSETGGFSRSRDSGTQPTDSARHNLASTFVNAFVNAGYGTDKLMTP…
unitig_2	g1336	4355	unitig_2:798932-803287	OTHER	N	N	GT2	1	MTTQVARGGDFASLEALRHALDQRKVDEAVHSLLLVLGDADNGTQRRRLETLQRVIHQVETLIKMQQVELTPGLCQDPVEGCLSYSQLQMYTLQTMAPQSTAYNIVRAVRMSSEPFDLEALQASCEAVMLQHEVLRTRFHTNLYGEPRQRVYTLENLLSTDEMAGRVRVVDYKGDVGSEELGDFIQRSVNLPFDLAIDAPVRFYVVQCASEWIWVAVMHHIVTDPESSGVFWKDLHVFYEQFVHTPTSRDRILQNLVSTSAYHCSYRDYAQWQRTRLQSGALSSSLHYWIQQLSKEIPALELPFDRSVDQGATSRDRPGDVVTFASTPQLQEAFSSLCASQGASMFMGSMAVFHMLLRRLSGVDDIIIGAPTSGRSHEALTGMMGYFVNTLPFRLQADQ…
unitig_2	g1463	5582	unitig_2:1047558-1053140	OTHER	N	N	GT68	1	MSATLAPVPTPSNDDASSPSAASTAALATLTDCVSTIVMTDVKYALCVMNSGLLALDSDAGALNTTESSAFSREGIVLSYIRAFEQQEGGSEDIQDVVGHCRLTCTAAGTRASSSCCQATERLRACELTPTLVTPALQACKASLDQSLAYSNDECGLAPADTAFVAIASVIVAVVVIVGGVLLYHRRRRKSPQQQGSTRGGHKNTLSNIAEQETAWHASLAQFLLQVQNLVWKNMVLRRRKPVAWLFEQVLPLLFVAALVVLANLDTIFGRNERDPVYASSDQAATFDNGTRLVCVDLSSLNPEDVGAPNSTMRSFYTSGQSVLGLFFLLSFVKFVSSTTAAMVHEKEIKMREMMKIMGVSDGMLLVAWCITHLLQTLPIVFVLTALLKYGNVFPTTPF…
unitig_2	g1695	1619	unitig_2:1538192-1539811	OTHER	N	N	GT47	1	MRVTALKTALRAATRHTDRHAAGHALRAAVAIESAQEQRSLLPLAVVLAAMGLATAVGATNTTASCESKPVAPTGPDVATHAMLREVVAKLNRIESAVANPKRSHDGLNQGVDVVLGAQWGDEGKGKLVDNLSQSYDVIARVAGGANAGHTIVHNGKKYKFHLVPSGILNPNAVCIVGNGVVVHLPSLLKELEELKRMGVDYEGRILISDRAHLVFDLHQEIDGLNEERRGRNKIGTTKKGIGPAYSSKMLRNGVRVGDLRYFDDFCDKLRDQVKFYKDNYPDLQVDVDAEIAKYREIKDVILGLTVDTVAYLNHAYVSGKKILVEGANATMLDIDFGTYPYVTSSNPSIGSVCTGGGISPNRLNGIIGIVKAYCTRVGEGPFPTELHDNVGEHLGRVG…
unitig_2	g1879	983	unitig_2:1965888-1966871	OTHER	N	N	GH18	1	MDKFQKVEKIGEGTYGVVYKAKDLVSGRVVALKKIRLEADDEGVPSTAMREISLLKELSSHPNVVHLYDVVHQQNKLYLVCEFVDQDLKKYLEGIPHRLEMLQIKSYLYQLLAGIAYCHANRVLHRDLKPQNLLIDQYGNLKLADFGLARSFGIPIRSYTHEVVTLWYRAPEILLGAKHYSTPVDAWSIGCIFAEMVNKQPLFPGDSEIDELFRIFRVLGTPDENSWPGVSNLPDYKTTFPKWRPQQLAKVVPGLDHVGLDLLSRLLVFEPSRRISARAAMAHPWFNDLHVQYQPSFRGNNNHGL
unitig_3	g2787	4708	unitig_3:1898267-1902975	OTHER	N	N	GH3	1	MADSGVAGAGGVAGDDPSENAYEKLSREVHQMQITSAIHQEWLENPKGYLLKPDFKRRMQHVGAGGKKLNSSRVLRIHLPGNTYRKRWFVLDGMILRYFKSEAEDQELGEIHLTSVNAVLPSSIADAPEHALDLVCADRIYTIAGNDREDMVRWATVLTLVLRGEYKPKLMQRPESTIIRGSSVIPRISRKTAQVSVSRFTDANGLRMTSALAEDPDGKDPIDDLKEKIITVTFDQQGPLNLQLRGTVDDEVMVCGFNESPDGSVGLAEASGVIKIGDLLISINNHYFTNIEFQHAIDLIQNAGRPLTLRFSRIDNSAQLETKRVAEGWILAKEPAAHRYRIRMLQLHGTKLKLFKPSMQGGRADQPSLTLLMDEVTDIRPINDTREAVSAFTQCYPKQ…
unitig_4	g3537	2672	unitig_4:1883879-1886551	OTHER	N	N	GH6	1	MNPQEFTDKTNECLQTARELAEEYGHAQLTPLHLTHALFDDAEGTARGLARNVSGDADGVVEETTRQLKQLPSQNPPPDIAGADSALIKVLKYASKLKKEMKDTHVACDHLVLALFSDSRVATILKANQLDEGKMKEAVKKMRGGRNVTSSNAEEMYDALNKYGQNLVSLAEAGKIDPVIGRDEEIRRVIRILCRRTKNNPVLIGEPGVGKTAIVEGLAHRIVMGDVPETLNCQLISLDMGALIAGAKYRGEFEERLKAVLKEVKDSEGKIILFIDEMHLILGAGQTSGAMDAANLLKPMLARGELRCIGATTLDEYRKHVEKDKAFERRFQQVLVKEPSVPDTVSILRGLKERYESHHGVQITDGALVAAAKLADRYIKERFMPDKAIDIVDEACANV…
unitig_9	g3590	1487	unitig_9:42207-43694	OTHER	N	N	GT2	1	MLPLRSLRLARHALRPHARCAQQPLSTGLSFSRSRNGSGSSTNTALTSMVLAAAVAGSAVATYATSATTECKAAVAKKTPATEEQKPEYLCKAEDFLYPPIQPFNTGMLQVSDKHTIYYEECGNPYGKPVVMVHGGPGGGCSEAMRRFHDPRVYRIILFDQRGCGRSTPHACLEENTTWSLVEDMERLRRHLNVEKWQVFGGSWGSTLSTTYAITHPTRVSELVLRGIFHLRKKELEFYYQSGASFLYPDRWEAYRDAIPENERHDFITAYHKRLTSDDPAVRLPAALAWTTWERTTSNLIPAADAAQNSMADAKFAEAFARIENHYFINKGFFPSDSFLLDNTYKIRHIPTVIVQGRYDVVCPMTTAWEFHKVFPEADLRVVQTAGHSALEPGIAKEL…
unitig_9	g4261	2249	unitig_9:1771607-1773856	OTHER	N	N	GH65	1	MSKVSAQVGVAVVTAAAMGMVRLRRAVYSTAKAIRPPVLEKRPHMVPFGAVPGQNRGDNPMKPILYIEDPYFYVRDDTRKNEEVIEHLRKENAYTEHKTKHLTNVRENLYNELLSHVQETDEEYPYPHGDYLYYTRTEKGSSYTFHCRKAKTGEESTSTAPEELILDENEIAKGQNHCDVSNVRPSPDHRYLAYMVDFNGYETYTGFIKDLKTGKLLPDRLENISSLQWGADSSEIFYATQDEAHRQNKLWRHKVGSSEPNECLYTENDEIFSAYFGKSRSGNYMFFMSSSSETSEVSFLDLKNPSKGLQLIAKRQKGVQYWVDHHGGHFYIVTNKGKAVNFKLVRAPVATPGVEHWQDVFPYDSKVKVDQVDCFEDFIVMNGRQDGFTQLWVIKEKAS…
unitig_7	g4339	1901	unitig_7:31996-33897	OTHER	N	N	GT25	1	MTLLAKTPTKLLAIAGAASLGYALDRQLLISTDFNKCGMMAVALLQSRQLARRGVLVPDLFEDAARRWPEKVCMAFEDRELSYKHVNEIANQMAHWGLRQGLKAGDKVALLMENRPEFVIVWLGLLKIGVVTALINTHLMADGLVHCIKIAQPSLVIVGVELLDKYAGIASELFGIASHVYGDGVTPWHMTPTYPFANSVDDTLVNMSKETPPPAIRRSKGASTNDMALLIYTSGTTGLPKAAKVNHFSIIFRSLVFHRSMSLNEFDRIYCALPLYHTSGGNLAVGMMVFSGATLCISRRFSTTKFWDEVRHHNCTVVQYIGEMCRYLMNAPPRDNDQENRVRAAFGNGMRPDVWADFQRRFKIPAVFEFYGSTEGVLGIVNPCTTPADQGHLGRRGYL…
unitig_507	g5544	2069	unitig_507:1287752-1289821	OTHER	N	N	GT29	1	MSAVQAVGYSTTLPGTERPGHGAIHRSVIPSQNPITDTVNPFCGLAKPHCESVYHNFLQSTKEFADHPCLGVQPIVAGEARPFEWLTYDQVGTRVVNLASGMMHFELLPRNAERQRMIAIYMKNSIDWIIAEQAAYSFGTVVVALYDSLGADSAEFILNQTELPTIVCTSVELAKLVAIRDKCPHLQNVIVSGSLDDALEARGKEVGLHVFTMTDLEVEGKKDPKPPQPPREEDIATIMYTSGTTGDPKGVVITHKALLSNAQGSLDYLTYFKRHYSTGSVYLSYLPLAHIYERSGQINCLRYGARIGFSQNNPLKLIDDIRALRPTVFCSVPRLLNRIHDLILAKMRHAPKVKRALFFTALNGKLKNLEKHGKTRHAFWDRTVFSKVAESMGLDQCQI…
unitig_507	g5648	6611	unitig_507:1549237-1555848	OTHER	N	N	GT2	1	MTSALAMTSVQRKRVAREDASDDETHLDDERLVIHTEDSTANDSDPASAPSHKSKTGKKISNAKAKKRVVSNAASRGIRSCFSAGTVVLLGLVWCALVFLMMRSLWLYQNVVSPLEKALGKQKAEAEAVVVVLGVAVPFVLSGLVFHWRSPRPLQSKRGSSSIVFQYLRSWRRTYVSPHFDSVDLVVIAAFAIVQMSTLVGKLMIDDFNGKIAKSGFLDRFSRSLGMNGLYGMVLSILLVARRSFVHQYLGLSSERAARYHVWCGNFAVITLTAHGVLYMFCWIQQGKLVEKLIPCMDCSSEKQAYGTRRNFSGLVAQVFLLIVALGSLERVRRNRFRWFTWTHCVNAAFVVFTGLHYYPTVYWLIPVFIVYVMYRVLSVFTRVTSGIVAMKTIGDNFV…
unitig_19	g6173	2931	unitig_19:1161561-1164492	SP(Sec/SPI)	N	N	GH81	1	MTTRKRLHGLVLCIALLFVPCATAAGTVRRWRDFVFGKIRQDGVEYFDFDVTADTYRIIVSFDRGPLEGLTPPKMLLKYGSFPSTTDYDQMMLLNSTGDFYQARVNNLRSGRYFISLVGPDLFNSLVSFVGGVNSLFYFVSVWHFGCSDPAWTGSKCTVPVLPSAPIASSITTGVNSVYYPSTQSEFNGCLDAKTSTLYFSYDVPHPKWDLVYTLSTSAASELRVAASVNLRDPAEVAKNKDTKSVTLAAGLGDRSAELRIPAPLKGQWMVMVTGKPSGTASCKTGTGVNFKLKAEHQEDCNKVDKARFQTTPSLPKVDLCGIGYTRMNPMRNEPTKAGHIIDADFECSVPKTGGGKQAMNQTQPVVGYIVEVPKMYAGSNLQLAALVTANIQSFQVYA…
unitig_28	g6543	3959	unitig_28:471553-475512	OTHER	N	N	GT2	1	MDVGTPVWALDDGIWREATVLAVDERAGTVECSLNETADDDQLVHDGDDVDDFIPVGRRRRNSRRGSMGTMDKPVPLANVLPRNHAEVYHTVEDLTKLVHLHEPAILQVLRKRFQHGLIYTSTGSILVALNPFRKLDLYSDTVKAKYYTEGGDEEAAKRLSPHVYSVADKSFRTMLSTRSKDQKCDQTILVSGESGAGKTETTKLIMNYLAYVSTHRKVRRSPSLTRSTSNMSKSSGGGGEPTIHDRVLESNPILEAFGNARTNRNNNSSRFGKFIKLGFGASGEMLGASISTYLLERVRLVSQGRGERNYHIFYEMIGGSSSSERDELRLLDVEQYKYLNQSGCVARLDGVDDGQSYQYTRHAMNSLGMPMEEQMGVMRVVAAVLRLGNIVFATEKGK…
unitig_28	g6616	6380	unitig_28:652417-658797	OTHER	N	N	GT68	1	MVPWTEGVLKLLGSAQLGMRALLRKNALVKARHALATLSELLNPLLCILLFAALKTLEPDMDIPSGWATETANKTHTESDVGSAWTLYATNNLLGDVNATLAGLGREGLPNATTGFNLSSITASPMGLLALTSGLDLPRFYFTETTMPGLLLNLGLQSLLEGERLDTLEPSDLFMCFLLLGLGGYTSLDPTSLYAVPRFCGDRVVPYKIAITPDTEYTRKYFTAIMDAWYPRTPLVAPVLGISPLTTASFLDSRVFFQNETALEDYLSSEEYGLDLDHPKIYAAIAFQEFPEEKEAIGDAGGHSIEFSLRFNSTFTDTNFPNSVPRTIKRRTRANALVKSVRSQAAMTYATRGFMTLQTAVMRVLNCLPAWDAQTETVMNPNACQLQKARMQPDPEHDK…
unitig_28	g6740	11772	unitig_28:978122-989894	OTHER	N	N	GH18	1	MKRLFQRPGSTASIRAKQSAPSSPNELGSSPDAQQKQRTRRSYSPERLMQSLSFGGSKTSKEKAESPPSVAEAAPFAAISTVKPQPASPRSTPDDLREQVAAYAAATTEESQFDAIKAIYEMICVEDDTMRIQMSEVDARVLVGVCSQRLRVDFQRRLERINSYKLEGQVKSETDNAELELSIATVAVVDRVLKDTSSTHVGGIIKERLPSTVVKVLQASDNGALKLDSRIVDHCLSLLMTLVQFSDTARELFETSTLHRLFFFKFASLKHQHVGLQIVETLAKSIQRDMRRKLISHVEEYQCLFGLLEAIVDGRSFEKVVIITGSVLRSAYDDGIVSLHKQLRTAHYYDKLLLAFRSVLDRDLVSVEAAKDQVSRIKQRHTSIRSAISELCLSGCEEA…
unitig_28	g6853	2150	unitig_28:1253922-1256072	SP(Sec/SPI)	N	N	CBM21	1	MALSRVTSLLVTLAVLSVSALAQDSGIHIFYQTTWTNPKIHYSINEGNWTTSPGVDMKASSNASLPAADGWFQFDADPSAQTIEFTFNDGNGTWDSDDRMNHQVSGNGVYTFGGANVLGVCGVFENKCTGLAYNESTENRRWQTPPRDDPTWKEEYQDMRSLQGYAHVEYSADRKSATVDVRTFLRDSKDVSCMYQFNGKAGFTSTFKATSSLKDALEVVTTCTKSTTNEQWTLKLDPVNFVWQSTPVDQPESMEKGQKGAIVDLFGWPYKDIEAECKDFLGKAGYMGVKINPPQETVLSDVWMKEGQRNPWYLIYQPVSYRLFSRMGSRDELRSMIETCRANGVRVYADAVINHMSPGGNDVNPTHRSGSAESCSKWGAHSSAIGSPYFTHTGQFQVN…
unitig_28	g6912	1679	unitig_28:1472475-1474154	OTHER	N	N	CBM13	1	MFSKVKLRFQTNRPKQGDTPSSYAKPRKVMSAPRVFKSNSGSGMELNPDERNSCEFLDHGLTIFVIGASGDLAKKKTYPSLFALYLAGYLPEHAVIVGYARSSKSDEEFREHLDSYLKVAKDDTTTLEKKASFLAKCIYRYGGYDSAEDVGKVSQEMELLENEKGKDVSNRLFYFAIPPSVFVPIGTSIKKAALTTRGWNRLIVEKPFGHDLSSFDELSRDMSALYSEDEIYRIDHYLGKEMVQNLLVLRFANSIFEPMWNRNYISSVVITFKEDIGTQGRGGYFDSYGIIRDVMQNHLLQVLSLIAMEPPVRASGTDYSNYIRDEKVKVLNCIQPISLDETVIGQYQGDPAQNEPGYLEDPTVPKGSVTPTFATCVLRVNNARWDGVPFIMKAGKALN…
unitig_26	g7148	1403	unitig_26:708366-709769	OTHER	N	N	GH16	1	MPPKFRPIPPDYDTEGSAIGCIYSGNCKTIGANHPGVPSAVYKKRGFNSWYQGLRYSANPFCASDSSKKQDYDTVAASIKKGIPKNTCDITTCPASKDGYADIGLIDGVGPGHWGINSNGTCFPVINAYTGAYLCDPDNQFEMCASPRPDNVPKTSVMPEFNYQMDAISSNWPVHVGAYLDYLVYQVEWVTGKNGYVRWMLDGHPIFEITSDAFSNVGQDADKTNPQKIMLEEPMYLIMNVALSTTWGARPPNPGKVCRGDGSDPATNAISDEFPMYLKVDYIRLYQDLGSDLEADNYMQVGCDPASHPTREWILGHIDSYEDWDNLMVDVAGGAYCRTDDDCTIGATNNTQAVRLVTGKCENKRCKCMHGNSWGGPRCTAAIKETQSSTSKSSKVSGF…
unitig_26	g7203	2291	unitig_26:848079-850370	OTHER	N	N	GH6	1	MWRRQLRTSRQALRLASVRGFSARGGPGPSQPWINPDNVPRGESLTKYGRDLTEVAKNGKLDPVIGREEQIRRAVQILSRRTKNNPVLIGEPGVGKTAIAEGLAQRIALGEVPESIKNKRVVSLDLAALVAGAKFRGEFEERLKAVLKDVEETQGEVILFIDELHTLVGAGGGEGSVDAANMLKPALARGSLHCMGATTLDEYRKYIEKDAALARRFQSVLVPEPTVEDTITILRGLKEKYEVHHGVRIADSALVSAATLANRYLTERKMPDKAIDLMDEAASRLRLQQESKPEPIDKLDREIILRRIEIEALRKETDAASKKRMVALEQEVEQLSQELRVLMDEWNAEKDRLEHMKESKRKLEEARRELVAAQNNGNYARAGELLHAIIPKLEQEVAE…
unitig_6	g7490	12072	unitig_6:185274-197346	OTHER	N	N	GH18	1	MKKLLGGLFQKQRDAHGPPATTPTHGAASPSPVPSTAASTASSTPANSKQRVWSPSGHHGEPSHKTGVRSSWETFFASSVRTTPPPSSSASANSSTQRVVQPAKVFNQNLEVLMRETAAKIKLVINKIVHEADFQDEFAQLCGFVNLAADKLLENGDCSVVLLRNYFVSPAGTALCEQTAFPSLVLDFVDKVRIHVIKLELKQLHASDSKGAQSESLPCPISASDLERPIRFLMSCVQAIASDNSLMDMFRCELPNLVYLVTEDYPASMVYLRDMACQALATIPDKNFTAALVWYLKDCSMVTKSVRMMVKYSEADIVSTNTAADALQVLASATKSPVFDASTTDQAPIAAAVSDALGLNTDSSEQVSEVTTVEAEVDGDADASPKATRHYVLTHYDPL…
unitig_6	g7908	5882	unitig_6:1209309-1215191	OTHER	N	N	GT68	1	MTEKRKITLGTHVRTLLWKSWLLKKRHPVATVLEIILPVLFIILLSGLKGLTTNVNVPAGWSDTSSSATDKTVGRSYTMTDYSGGFGAWNLGMDVGWIGSSERRYLVTETTMSGLLMYLSMRSADEMRNVDDFKTKADRISCTSQVGFFGAVNTDTTAANAIPANCRDHVTPYKIAIAPDNTFTRKYFLETMKVWYPQVAISKSNYNSASPVKIPAFEDSVVFFKNEAELEAYITSTEYGKTADTPKIYSAVVFDKYPMDDASIGQPSSIEYSLRFNATLGKRGASGDVPRTIGEPAFESPFQRTISTEPYSRYAMLGFMTLQTAVTRFVNCMPVWDASTKSTTGACQHQKAMATSDPALDVQLFQRIANDFFIKMALPFAFNDPTTAATELMSISSAE…
unitig_39	g8647	1592	unitig_39:477105-478697	OTHER	N	N	GT8	1	MPSVQAVSTGLAARVDAVPAQDGAFATIFYDYGEDSDAMLLAIRVLMRSIRDSQTKYRKLVIVPQDGLLPTSKQRFQQDDPSIEIVRADIPNIFRRNSVMDPRAQLLHMRNKLVLWDDPVLAKLQRIVYLDPENLVLNNFDEIFACAQFCAVDNGQSIVYSNSLLVVSPESIAARNLYSDAIDSFMISGREYNYIGITQGFLPGLFQALEESPLFNVDQDEADDEFEKEAAKSVVRRLPFYYSINHMVFYERMNWDLYKCKDKNKSSKQIPGPLLSYKYSGATIKPWFWMPYVYFEVNWHWLDMRERLQEDHVGFFFSKLISQSVLFVLSWFAYVAICLKLRSEPNGRMRRLSSWNLPGPTTTPALSMDLLNSNVVRKACQFSCNVLYAISSTPIFSSF…
unitig_43	g8988	3385	unitig_43:20914-24299	OTHER	N	N	GT13	1	MADQQPPATPAPTEAKDALPPAAPATVAVEAGEEKKLSKNALKKAMRAQKDGGKPKKDKDPNRWAPKKDKEPKKKETKVEETPFVNLTPKGKKKDMTSPMAPAYSPVAVESAWQDWWEQAGFFTCTDEKIKNAKKDERFVMVIPPPNVTGSLHLGHALTVAIQDALTRWHRMLGHATLWVPGTDHAGIATQSVVEKRLLKEEDKSRHDLGREKFLERVWDWKNQYESRIHQQFRSVGCSVDWTRVYFSMDDNCSRAVRHAFCKLWEDKLIYRATKMINWSCKLKTALSEIEVDYIDIEKRTKMIVPGHNPDRKYEFGVLTSFGYVVEGSDEQLIVATTRLETMLGDTGVAVHPEDPRYTHLHGKFVIHPFNGRRIPIVLDAELVDMSFGTGAVKLTPAH…
unitig_43	g9157	1333	unitig_43:457262-458595	OTHER	N	N	GH5	1	MPSSSPLDGIKSPRDGSSYGSTAVRDPSSMNWFLHRLYLRGEFKECLRVIEDVLKRHQGLSEYPIYVKALILRHSGRIQESLQLFQAATCLNPDNKENLKQVGRSLYLLGKHTAAIEVYEEIISIGKSEDWEIYHSIGLCYMYLKEYEKAIESFQQANAINRHDATFLQLGKVHTLREDFKAAINVYLEALEFSPENPEILTTLGLLYLRIGENFRAFDYLGNSLTHDPRSAKTILAAGSIIQDHGDMDVALVKYRVAAVQTPNSAQLWNNIGMCFFGKQRYVASVACLKRALYLDPFEWITSYNLGLVHLNTGQYASAFHYFSAAINLKPDFPSSYMYLAITLGRLDDFENACSAFEKAIEMERDHMFHLNYAITLYNNDEMERAKVQFDRFEEIFEA…
unitig_35	g9485	3518	unitig_35:52174-55692	OTHER	N	N	GT0	1	MPPAPSMGHAAAPPPPFAASADVTMAELERPVKNVEDKWKLLPYFLQLRGLVKQHIDSFNYFTSVDMKNIVRAKANNMVRSDADPKFFLQYTDIHIGSPSIEEEAFVSSSVTPHQCRLRDRTYAAPVYVSVRYRRGNKIVTNNKVLIGRIPIMLRSANCVLTEKGEAELAKLKECPYDPGGYFIVKGVEKVVLIHEQLSKNRVIIEEDAKQNVCASITSSTHERKSRTNIFINKHRVYLKSNSFGSDIPIVIVFRGMGVESDQEIVSLIGSEPDISDALTASFEEASDLKVFTQLQALEYIGSKMNAITKAGTMGGRHRSHGHNQDRSLADAARSALANLVLNHVPCEDYNFRLKSIYVAHIVRRIILTDKDRTRLDDKDYYGNKRLELAGQLLSLLFE…
unitig_35	g9868	4487	unitig_35:1063041-1067528	OTHER	N	N	GT2	1	MAPNTTESTARARGQSAALGLSIGTRCYIPDKERIWLPVTVEQVNPQEQTATFVVDPEANDGSEDEKSIELSLAGQVHFPLQNAPARTPGGYEDMIDLNHLHEAAILYNLKRRFLARLPYTYTGTICLAVNPYQWIDELYSHGLHAKYLAARSQKQLPPHVYAVSVAAFKHMSGEALNQSILVSGESGAGKTETTKILMDNLAQIGVSSSADAEQTTIQRILDVNPLLESFGNAKTKRNDNSSRFGKFTQLQFHRKGQNMVLTGAKCETYLLEKTRVVTQEAGERNYHVFYQIFHGSSAAEKGEWGFLADEPITNYTYIADDDANMSAKDQRNFERTKHALSLLGLSSEEQNALFRVLAGVLHLGQVVFEPNPDNDEASHVTESSVMVAADLLGLDTTE…
unitig_412	g9942	3614	unitig_412:30511-34125	OTHER	N	N	GT0	1	MGWDSHLDSDNEHDDQYEGHDLDGGSGMGLHMGACVSQEDAWAVISAYFEEKGLVRQQLDSFDEFIQNTMQELVDDSRSIRINPEAQYNPGQAKANTDTIYQISFGQIYLSKPTMTEADGSTSVMFPHEARLRNLTYAAPLYVDVVCQKYQAPSSGPANLDEMEPYEQVETPKEFIGMVPIMLRSQYCVLTHKTDKELTELNECVYDQGGYFIINGSEKVLIAQERMSNNHVYCFRKSGTSKYSWVCETRSHVEHGVRPTSTMYVQMYQRSGGKSAITGNQIRSVIPYIRQDIPVVIIFRALGFVADREILEHICYDFSDAELMERFKPSLEEAFVIQEQEVALDFIGRRGSAINVSKADRIRYAQEILQKEMLPHVGVEDHNETKKAYFLGYVVHKLL…
unitig_412	g10061	1505	unitig_412:290312-291817	OTHER	N	N	GT4	1	MVAMGDSSGSSFLLHACILLLLLILTLLQIMFFAFLPEIELHADFCNATVASKTLTAATSPELRTPMHLFYRSLYLSPREIASREKDAREKAERERHAALITDIMKNSPKIRGEKDGAMDAERLTKQETEGEKLDVKKGFFLQAMGQGHDALNSTSTYCINLITPNDSPGVLQDFELYLNALPSSRPVYAFKGHTDLPASVIDLYLERHPIDKKYYRYFNAPHDKTIWMMQNAEFFDRHELANPDVGVMVIKNRIGLKKVLEYRHRHNMGYTVFYTKHTSHDVYQPEIERDWTSFLHLAGWSPFKNTRVILQAWARHPEWPKLVLRVIKADICSWIDETYGPSGEWRLANVDYKCGSEPLDMKNELQNKIGLHLCPSETEGFGHYINEARSAGALILTT…
unitig_53	g10533	5489	unitig_53:486305-491794	OTHER	N	N	GT68	1	MTSSSASDASYSLLSACLENVFARDLAYAVCLMNSGLFELSGQSLDDNAPGNVGLVAALANTTASSQEYASTLLANGGNVKVGQCRLLCTDTSLLGASSSCCQAASNVHNCEPTTSSVASCKGVLEQAFGFDQQCGLSGENIGLVVGTVLVVILVLTMVILARKHARRQGKKAIAALEGRLAAGVATRWEAVMASWHQISNLVWKNVVLRRRKPVAFVFEQFLPVLLVGALVFLANLDNIFPAIEPTTSTTGSSEALFDSSTTLLCTALTDVNESDIGAPNETMTTFYTSGQTVLGMFLLISYIKFVSTTTTTMVIEKETRIREVMKIMGLSDLTLLFSWTLTSALLSTPLAFVIAAELKFGNVFPGAEYATLVFLFWSFSMSIVAFSYFITPFFNKSR…
unitig_56	g10885	2666	unitig_56:426874-429540	OTHER	N	N	GT22	1	MATEAELTAQIAAKGEEIRVLKSAKDESKKEELQAAIAQLLALKTQFKEVTGKDYGPPPKQPKEKKKAADAAPEEPKDPNKKSKKELNKERKKAAKAAIKAGGDLEEEKKEEKAAAAPVVKKEGKAAKPAAAAPPVAAPVFTGAVGCVLPTPKADQDGAIVFSSQSSALPLASYVVAVLSQQTQGFQNHIDEKTIEPTLTFVNGDVISGDFAVARYLCRAKPSLGLFGIENNAVVVSQVDSWLDFALSRFSDAKSTNVAKGLALLDVVLKERTFLVAYALSLADIAVWSRLHALKLDVSSYANVSRWWKYLSSQSIFAGAEAALKALPAVKKPQQKPAADKKPVKGGDKPASQKGKNTGSCPPLQGAVDGQVVTRFPPEPSGYLHIGHLKACLLNDYYA…
unitig_386	g11333	1976	unitig_386:852523-854499	OTHER	N	N	GT29	1	MGGTNSVEQPMSEIDFASYKGKRYAQELPDTKEEKRGPIYVSKQVECDPKKLTSFEVFLTGRALDNGTRRCYGTRNLEDGEYEWMTYNDVYDRMAAIAAGLKEFAGLERQNMVGIYSKNRAEWCLSAHACDRMAYVHVPIYDTLGADVLPFIVNHAELTTLFCSRDLFDTVIKCKDECQPLKYIVQFEEVDEEQQQVAEKNGLQIKSLREIEEMGEKRPIPADPPLPEDIATLCYTSGTTGNPKGVVLLHKTLAIIGVLMEDRLDLPSEVVHISYLPLAHVFEHAVLSVVLRVGGCVGFYQGDVHKLTEDIAALRPTVFVSVPRLLNRIYDKITQGVESAGGIKKLMFDQGYAAKKEGLKKGSKTHAVWDCLVFSRLRQVLGGRVNSIFSGSAPLDPEV…
unitig_386	g11342	1979	unitig_386:868377-870356	OTHER	N	N	GT29	1	MGMGPSKSLFDEALPTYTEVPGSKTEAHGFIHVADAETGYKPYMTLYTNLMERRRVDDGSRQIFGWREKDPVTGVAGPYIWVTYNEFLEQVEALSSGMVHELQTKRQEAVGVFSKNRYEWSLVEHSANRMSYQLVPLYDTLGPEAVPFILNHTEMRVIFCGKEQFKALMAAVEKSPAVKMVVQFEDVSDEDRKEAESKNLVLKSLKELMEVGKSKPVEADPPTPDDIATICYTSGTTGNPKGAMLSHGNMVSAVAATYALHPMTPEDVHLSYLPLAHVLERAVQSVVLGGGGSVGFYQGEIPKLMDDLAALQPTLFPSVPRVMNRVHDKILQGVEKAGGLKKFMFNWAYAAKKKNLAQGYIHHAFWDALVFNKIKQLMGGKVRLMMNGSAPISQDCKEF…
unitig_386	g11351	1991	unitig_386:880980-882971	OTHER	N	N	GT29	1	MGASASTELPMSEIDFETYKGARYSQEVPNTREANRGPIYVTKPRYVDEKKLTLYENLLTGVAIQNGERPCYGTRTKVNGQPGPYEWLTYNQVLAHTETVASGLTKFAGLQRAGMVGIFSKNRVEWCLTAHACDRMSYILVPLYDTLGPDAVPYIVNHTELTTLVCALEQFDTVLKCKDECPTLQYVVQFENVTEKQRQQAAQKGIQLKSFAEIEELGKSFPVPADPPTPQDVTTICYTSGTTGNPKGVILTHHGLTILGYLTEQRLQLHPDIVHISYLPLPHVFERSVITSAVHLGAASGFYSGDVLTLMDDIAELKPTIFVSVPRLFNRVYDKIVQGVAAAGGLKKVLFDQAYAAKKAGLAEGHKTHALWDALIFSKIRQVLGGRVNMLLSGSAPLS…
unitig_386	g11352	1970	unitig_386:883605-885575	OTHER	N	N	GT29	1	MGGSYSTEELPAPASFSQEVANTKEATRGAIRVTKPCYADPKTLTLYENFRLGLAMDRGLRRCYGTRAVADGQPGEYEWMTFADVAARSETIASGLTKFAGLQRQGMVGIFSKNRVEWCLTAHACDRMSYILVPLYDTLGPDAVPYILNHTELTTLVCAREQFDTVLKCKDACPSLQYVVQYEQLTEKQRQQAQEKNVIVKSLSEIEDLGKNHPIAAEPPTPEDIATICYTSGTTGNPKGAVLLHNSMTQLGVITVERLGLHSDMVHISYLPLPHVFERAFITASVRLGAAAGFYRGDVLTLMDDIAALQPTIFVSVPRLFNRIYDKITQGVAAAGGIKQALFEQAYAAKKAALADGYKTHAFWDMLVFNKIRQVLGGRVTFMLSGSAPLSAEVKEFMA…
unitig_386	g11353	1991	unitig_386:886330-888321	OTHER	N	N	GT29	1	MGGATSTELPMSEIEFESYQGHRYSIEMPNTREATRGPVYMTEMLELDPLKLTLYECLLSGLAMENGSRPLYGTRKIVDGQPGEYEFLTYQQVFDRVEAVAAGLTKFAGVKRQEMVGIFSKNRLEWCVSAHACDRMAYVLVPLYDTLGPEAVPYIVNQTELTTLLCAGELLTKVLSLKEKCPTLKNIVSFDEPTEEQRQLAKQNDLELVSFKDMEALGEQHPIPADPGLADDISTICYTSGTTGNPKGVILLQRNLATIASITEKRLNLNSDIVHISYLPLPHVFERLVIASINRLGGCAGFYRGDIATLMDDVVALKPTQFCAVPRVFNRLYDKITQGVEAAGGVKKLIFDQAYASKKAYLAEGYTTHALWDSIVFAKLREILGGRVNFMLSGSAPLS…
unitig_386	g11354	1997	unitig_386:888777-890774	OTHER	N	N	GT29	1	MGGAQSTLPAMTDVDFETYEGRRFSVEVPNTREATRGAARVDKPVYLNESELTLYKNLLAGVAVQHGNRPLYGTRAVNADGTRGEYEWMTYNEVLARTDVIAAGLTKFAGLTRKSMVGIYSKNRVEWCLSAHACDRMSYILVPLYDTLGPDAVPYIVNHTDQTLLICANEQFDNVLKCKDVCPTLKYIVQFEHVTDEQRQQAMKKGVELKSFREIEELGEKNPIPADPPSPEDIATLCYTSGTTGNPKGVILTQKNITVLGWIIRDRLAITADDVHISYLPLPHSLERAVISTLVGMGGSVGFYCGNVLTLMDDVAVLKPTGFISVPRLFNRIYDKINDRVNNAGVVTKMLFDQAYASKKAYLAEGHKTHALWDTLVFSKIRAMLGGRLRLILSGSAPL…
unitig_386	g11356	1997	unitig_386:892844-894841	OTHER	N	N	GT29	1	MGGSCSTLPSMTEIDFESYRGHRYSTEVPNTRDATHGAARQTETIALDESKLTMYETLLKGAAVDNGTRALYGTRAINADGTRGEYEWLTYNEVVARTDVIAAGLAKFAGLQRKSMVGIFSKNRVEWCLSAHACDRMSYVLVPVYDTLGPEAVPYIVNHTEQTLLICAKEQFDTVLKCKDTCPTLQYIVQFEELTQEQRQRAEAQGVQVKSFREIEELGKSHPLPADPPSPEDISTISYTSGTTGNPKGVIMLHKNLAVLTVMYADHLRLTQDTVHMSYLPLPHVLERCSVSTVVGIGGSIGFYSGDVLKLMDDMAILKPTCFITVPRLLNRIYDRINQKISTAGGVSQFLFNHAYSSKQASLADGYKTHAVWDRLVFSKIRAMLGGRVEFVLSAAAPL…
unitig_386	g11357	1997	unitig_386:895228-897225	OTHER	N	N	GT29	1	MGATCSTETPLTDVDFETYKGHRYTQEVPNSRDATHSAARYAEKTEWDESKLTLYQNLLTGAAKDNGTRALYGTRAVNADGSRGEYEWLTYNDVIARMDVIAAGLTKFAGLVRQSMVGIYSKNRVEWCLSAHACDRMSYILVPLYDTLGPDAVPYIVNHTEQTLLICANEQFATVLKCKDECPTLKYVVQFEDVTDEQRQEAEAKGLELKSLREIEELGEKNPIPADPPTPEDITTLCYTSGTTGKPKGVILLHKNLTCIGWIIRGRLGLVADDVHISYLPLPHVFERGCVSTMISLGAAIGFYSGDVLKLMDDMAVLKPTVFAAVPRLLNRIYDKINLKISLAGGLSKAIFDHAYASKQGYLPKGYTTHGLWDRVVFSKIREMLGGRIRFVLAAAAPL…
unitig_386	g11358	1994	unitig_386:897864-899858	OTHER	N	N	GT29	1	MGANASTELSMTTVDFESYKGIRYAQEVPNSREANRGPIFVTKPMYADESKLTLYTNFLAGVAIDGGDRRLYGTRKIVNGQAREYEWITYNQALASIDAIAAGLTKFAGLKRNDMVGIFSKNRVEWCLSSHACDRMTYPLVPLYDTLGVDAVPYIVNHTELTTLIHAGELFNVVLECKDACPSLKYLIQYEDVTEEQRQQAAQKGLQITSLREIEALGKRNPLPADPPTPEDIATICYTSGTTGNPKGVVLTHRNMAFMGFLTHERMGLHKDVVHISYLPLPHVFERAVITSTVRLGACAGFFTGDVLTLMDDIAELKPTIFVSVPRLFNRVYDKITQGVAVAGGLKKLLFDQAYAAKKAAIADGHKTHAFWDALVFSKIRQVLGGRVDIMLSGSAPLS…
unitig_386	g11360	1997	unitig_386:901036-903033	OTHER	N	N	GT29	1	MGGTCSTAELAMSSIDFDSYKGIRYTEEVPNSREENRGPIYLAKPINVDETKLTLYENLLSGVSLENGNRRVYGTRRVVDGQPGEYEWITYKQALERSVTIAAGLTKFAGLKRNDLVGIFSKNRVEWCLSSHACDRMTYALVPLYDTLGADAVPYILNHTQLSTVIFAQEQFNVVLECKDSCPAVKFLVQYEDVTDEQRQLAEEKGVEIKSLQEIEALGKANPVPADPPAPEDIATICYTSGTTGNPKGVVLTHRTMAFLGVLTQERLRLHKDIVHISYLPLPHVFERAVITAMLNLGASAGFYCGNVLTLMDDIAELKPTIFVSVPRLFNRVYDKISQRVEAAGGIKKALFDQAYAGKKAALASGQKTHAFWDALVFSKIRQLLGGRVDTMLSGSAPL…
unitig_386	g11361	1994	unitig_386:903760-905754	OTHER	N	N	GT29	1	MGVNTSTELPMSAIDFETYQGLRYTQEVPNSRESNRGPIYVTKPIHVGQNMLTMYDNLLTGVGIENGTRRLYGMRKIVNGQPREYEWMTYNQAFAHVEAIAAGLTKFAGLKRNDMVGIFSKNRVEWCLSSHACDRMTYTLVPLYDTLGVDAVPFIVNHTELTTIIYASELLSVVLECKDACPTLRYLIQYEDVTDEQRRLAGEKGLKLMSFAELEALGKSHPLPADPPMPEDIATICYTSGTTGNPKGVVLSHFNMAMLGAMTRDRVPFHKDVVHISYLPLPHVFERAIMTSVVFLGAAAGFYQGEVLTLMDDIAELKPTIFVSVPRLYNRVYDKITQGVAVAGGLKKMMFDKAYEAKKTGIADGRKTHALWDTLVFSKIRKVLGGRIDTMVSGSAPLS…
unitig_386	g11363	1994	unitig_386:907086-909080	OTHER	N	N	GT29	1	MGAESSTDLPMSAIDFETYQGLRYTQEVPNSREPSRGPIYVTKPLYVDESKLTLYTNFLTGVAIDNGTRNLYGTRKIVNGQAREYEWITYNQALAYVEAIASGLTKFARLKRGDMVGIFSKNRAEWCLSSHACDRMTYTLVPLYDTLGADAVPYIVNHTELTTIIYASELFNVVLECVDACPTLKYIVQYEDVTEAQRRMAAEKGLELKSLAELEALGKSHPLPADPPTPEDIATICYTSGTTGNPKGVVLKHRNMAIIGSMLQELGKFHSDTVHMSYLPLPHVFERAIMSLIVYLGAAAGFYQGDVLTLMDDMVALQPTLFISVPRLYNRVYDKITQGVAVAGGLKKMMFDQAYAAKKAARAEGYKTHALWDALVFSKVRQVLGGRIDTMISGSAPLS…
unitig_386	g11365	1994	unitig_386:910435-912429	OTHER	N	N	GT29	1	MGAESSTDLPMSAIDFETYQGLRYTQEVPNSREPSRGPIYVTKPLYVDESKLTLYTNFLTGVAIDNGTRNLYGTRKIVNGQAREYEWITYNQALAYVEAIASGLTKFARLKRGDMVGIFSKNRAEWCLSSHACDRMTYTLVPLYDTLGADAVPYIVNHTELTTIIYASELFNVVLECVDACPTLKYIVQYEDVTEAQRRMAAEKGLELKSLAELEALGKSHPLPADPPTPEDIATICYTSGTTGNPKGVVLKHRNMAIIGSMLQELGKFHSDTVHMSYLPLPHVFERAIMSLIVYLGAAAGFYQGDVLTLMDDMVALQPTLFISVPRLYNRVYDKITQGVAVAGGLKKMMFDQAYAAKKAARAEGYKTHALWDALVFSKVRQVLGGRIDTMISGSAPLS…
unitig_386	g11367	1994	unitig_386:913784-915778	OTHER	N	N	GT29	1	MGAESSTDLPMSAIDFETYQGLRYTQEVPNSREPSRGPIYVTKPLYVDESKLTLYTNFLTGVAIDNGTRNLYGTRKIVNGQAREYEWITYNQALAYVEAIASGLTKFARLKRGDMVGIFSKNRAEWCLSSHACDRMTYTLVPLYDTLGADAVPYIVNHTELTTIIYASELFNVVLECVDACPTLKYIVQYEDVTEAQRRMAAEKGLELKSLAELEALGKSHPLPADPPTPEDIATICYTSGTTGNPKGVVLKHRNMAIIGSMLQELGKFHSDTVHMSYLPLPHVFERAIMSLIVYLGAAAGFYQGDVLTLMDDMVALQPTLFISVPRLYNRVYDKITQGVAVAGGLKKMMFDQAYAAKKAARAEGYKTHALWDALVFSKVRQVLGGRIDTMISGSAPLS…
unitig_386	g11369	1859	unitig_386:917134-918993	OTHER	N	N	GT29	1	MWMKASSRFTPTSLRGVAIDNGTRNLYGTRKIVNGQAREYEWITYNQALAYVEAIASGLTKFARLKRGDMVGIFSKNRAEWCLSSHACDRMTYTLVPLYDTLGADAVPYIVNHTELTTIIYASELFNVVLECVDACPTLKYIVQYEDVTEAQRRMAAEKGLELKSLAELEALGKSHPLPANPPTPEDIATICYTSGTTGNPKGVVLKHRNMAIIGSMLQELGKFHSDTVHMSYLPLPHVFERAIMSLIVYLGAAAGFYQGDVLTLMDDMVALQPTLFISVPRLYNRVYDKITQGVAVAGGLKKMMFDQAYAAKKAARAEGYKTHALWDALVFSKVRQVLGGRIDTMISGSAPLSAEVKEFMAVAFGCDFLEGYGLSETGAVVSAPLRHTPLGAHVGMPL…
unitig_386	g11370	1964	unitig_386:920487-922451	OTHER	N	N	GT29	1	MSAIDFETYQGLRYTQEVPNSREPSRGPIYVTKPLYVDESKLTLYTNFLTGVAIDNGTRNLYGTRKIVNGQAREYEWITYNQALAYVEAIASGLTKFARLKRGDMVGIFSKNRAEWCLSSHACDRMTYTLVPLYDTLGADAVPYIVNHTELTTIIYASELFNVVLECVDACPTLKYIVQYEDVTEAQRRMAAEKGLELKSLAELEALGKSHPLPADPPTPEDIATICYTSGTTGNPKGVVLKHRNMAIIGSMLQELGKFHSDTVHMSYLPLPHVFERAIMSLIVYLGAAAGFYQGDVLTLMDDMVALQPTLFISVPRLYNRVYDKITQGVAVAGGLKKMMFDQAYAAKKAARAEGYKTHALWDALVFSKVRQVLGGRIDTMISGSAPLSAEVKEFMAVA…
unitig_65	g12028	4264	unitig_65:160586-164850	OTHER	N	N	GT2	1	MEGVRVFVPDNEHVWLPGVITQSAGNGKHLVVRLDKVIGPQDPQALNAIPAEQELASMMGTEREINLDDAALVKALASRHTTVSNTGADADAGEDGNGISLPLQNALDSARASTGFEDMITIDHLHEASILHNLRHRFFHKLPYTYTGKICIAVNPYQWLNLYDKSIMASFSDGKREGKSPHVYAVSMEAFYNMRHQRENQSILVSGESGAGKTETTKIVMSHLAALAENSNSKVIQQIIQANPLLESFGNAKTVRNDNSSRFGKFTELQFGSDGKLIGAFSRTYLLEKSRVTTQADGERNFHIFYQLLKRRADFPELDLTALDAFKYVSGSAMADIKAAALEEEGDLTRTTEALELIGIPSDLQKEIFQILASVLHLGETTFAVRDGDVDASTVVDLK…
unitig_65	g12162	1755	unitig_65:459615-461370	OTHER	N	N	GT2	1	MAEADAWKAKGNAALSAGNAQEAVDCYSKAIALNPNDHVFFSNRSAAYLSLSDAQHALEDAEACIKVKGDWAKGYSRKGAALHALRRYEEAIEAYEAGLKVEPGNAACASGVEEVKKVVLQSSSFNPFANAFGPDMFGKIATNPRLAPLLSDPELVAKLTELQRDPTKINVHLQDPRIMSVLGELMGLNVNMGEDADDVPPASSYAPKTKEPERPKTPEPEPMDEDLTEEEIQAREARKAAEEAKQKGNTFYKAKQFAEAVECYNEAIAKDPTNIAYYSNLAAVRLEMGEYDACIDDCKKAIEVGRSNRADYQLIAKVYVRIGNAWVKKGETAENLERAIEAYENAQVEFRTKDVEKKVKTLQQKLKKAKELAYIDPEKALAAKNEGNDAFKAGDFPKA…
unitig_18	g13974	4087	unitig_18:382006-386093	OTHER	N	N	GT31	1	MRAPVTLPSFTCQTTSFALVMLLLEITASVLFFTLHQISKVHDGTFLLCAVLSIISIACGVLGICRSTPAVLTSLILAIATTFGFILLGVLCIVFTFDVHSSVATYLNKSLLPITQDYNNELLADTKLYLSLCASMLLISALLHGIFCHHLSKVLGGRRSSIAFLQTFSLIVLPFSLFLMIGGQYIVDTGTLASAPYTGIIIFAGGSMMLTIALLSFVGGSFEYRRLLSICCLLSYIAGTLFVGLSIVYFAVKGQVQDQILLHWEELRVMLPPTFQARYDRDQFIELTQTNLKLVACAGIVCGLFIFHEAGVCMSLMHHATRFKRQMAHDKQTIRRHEAQNNDSEASDHPHTPVDPHVIQRSQWSQRFDMSKRRQRICMRVVAFFVVIAVALIFGVMCA…
unitig_18	g13998	4014	unitig_18:433694-437708	OTHER	N	N	GT13	1	MAMLLRAATARRALAARGWPRHARRFAQVVGAVELPSDIHKRVREQPLSATFDPAAVEHGWQEYWQRVIQEKRRALGDDAKTFSMVLPPPNVTGALHIGHALTITIQDALARWHHMRGFKVNWIPGLDHAGIATQSVVERKLLKEEGKSKYDLGRDAFIDRVWQWNEQYGGRIMDQIDVLGAVVNKDQSYFTLDEKRSEAVIEAFVQLHERGLVYRKRRMVNWCPILKTAISDIEVDAESLTGSTMKTLPGRSNPVEFGVMHRILYKVVDSDEYLHVDTTRPETIFGDVAVAVHPEDPRYQRFHGKHVVHPFSGKHIPIVTDDVLVNMELGTGVVKVTPAHDPKDYECGLRHDLSEPVVIDDNGKMCGDIDPDFIGLDRFDAREKVVDQLKEKELYVEK…
unitig_387	g14006	2296	unitig_387:1-2297	OTHER	N	N	GT29	1	MGAESSTDLPMSAIDFETYQGLRYTQEVPNSREPSRGPIYVTKPLYVDESKLTLYTNFLTGVAIDNGTRNLYEAIASGLTKFARLKRGDMVGIFSKNRAEWCLSSHACDRMTYTLVPLYDTLGADAVPYIVNHTELTTIIYASELFNVVLECVDACPTLKYIVQYEDVTEAQRRMAAEKGLELKSLAELEALGKSHPLPADPPTPEDIATICYTSGTTGNPKGVVLKHRNMAIIGSMLQELGKFHSDTVHMSYLPLPHVFERAIMSLIVYLGAAAGFYQGDVLTLMDDMVALQPTLFISVPRLYNRVYDKITQGVAVAGGLKKMMFDQAYAAKKAARAEGYKTHALWDALVFSKVRQVLGGRIDTMISGSAPLSAEVKEFMAVAFGCDFLEGYGLSETG…
unitig_387	g14008	1460	unitig_387:3841-5301	OTHER	N	N	GT29	1	MVGIFSKNRAEWCLSSHACDRMTYTLVPLYDTLGADAVPYIVNHTELTTIIYASELFNVVLECVDACPTLKYIVQYEDVTEAQRRMAAEKGLELKSLAELEALGKSHPLPADPPTPEDIATICYTSGTTGNPKGVVLKHRNMAIIGSMLQELGKFHSDTVHMSYLPLPHVFERAIMSLIVYLGAAAGFYQGDVLTLMDDMVALQPTLFISVPRLYNRVYDKITQGVAVAGGLKKMMFDQAYAAKKAARAEGYKTHALWDALVFSKVRQVLGGRIDTMISGSAPLSAEVKEFMAVAFGCDFLEGYGLSETGAVVSAPLRHTPLGAHVGMPLPNLLVRLEDVPEMGYTSNDKPRPRGEIICKGPNVFSGYYKEPEKTAEAIDQDGWFHTGDIGCWNADGTL…
unitig_387	g14010	1994	unitig_387:6997-8991	OTHER	N	N	GT29	1	MGAESSTDLPMSAIDFETYQGLRYTQEVPNSREPSRGPIYVTKPLYVDESKLTLYTNFLTGVAIDNGTRNLYGTRKIVNGQAREYEWITYNQALAYVEAIASGLTKFARLKRGDMVGIFSKNRAEWCLSSHACDRMTYTLVPLYDTLGADAVPYIVNHTELTTIIYASELFNVVLECVDACPTLKYIVQYEDVTEAQRRMAAEKGLELKSLAELEALGKSHPLPADPPTPEDIATICYTSGTTGNPKGVVLKHRNMAIIGSMLQELGKFHSDTVHMSYLPLPHVFERAIMSLIVYLGAAAGFYQGDVLTLMDDMVALQPTLFISVPRLYNRVYDKITQGVAVAGGLKKMMFDQAYAAKKAARAEGYKTHALWDALVFSKVRQVLGGRIDTMISGSAPLS…
unitig_387	g14012	1994	unitig_387:10346-12340	OTHER	N	N	GT29	1	MGAESSTDLPMSAIDFETYQGLRYTQEVPNSREPSRGPIYVTKPLYVDESKLTLYTNFLTGVAIDNGTRNLYGTRKIVNGQAREYEWITYNQALAYVEAIASGLTKFARLKRGDMVGIFSKNRAEWCLSSHACDRMTYTLVPLYDTLGADAVPYIVNHTELTTIIYASELFNVVLECVDACPTLKYIVQYEDVTEAQRRMAAEKGLELKSLAELEALGKSHPLPADPPTPEDIATICYTSGTTGNPKGVVLKHRNMAIIGSMLQELGKFHSDTVHMSYLPLPHVFERAIMSLIVYLGAAAGFYQGDVLTLMDDMVALQPTLFISVPRLYNRVYDKITQGVAVAGGLKKMMFDQAYAAKKAARAEGYKTHALWDALVFSKVRQVLGGRIDTMISGSAPLS…
unitig_387	g14014	1994	unitig_387:13695-15689	OTHER	N	N	GT29	1	MGAESSTDLPMSAIDFETYQGLRYTQEVPNSREPSRGPIYVTKPLYVDESKLTLYTNFLTGVAIDNGTRNLYGTRKIVNGQAREYEWITYNQALAYVEAIASGLTKFARLKRGDMVGIFSKNRAEWCLSSHACDRMTYTLVPLYDTLGADAVPYIVNHTELTTIIYASELFNVVLECVDACPTLKYIVQYEDVTEAQRRMAAEKGLELKSLAELEALGKSHPLPADPPTPEDIATICYTSGTTGNPKGVVLKHRNMAIIGSMLQELGKFHSDTVHMSYLPLPHVFERAIMSLIVYLGAAAGFYQGDVLTLMDDMVALQPTLFISVPRLYNRVYDKITQGVAVAGGLKKMMFDQAYAAKKAARAEGYKTHALWDALVFSKVRQVLGGRIDTMISGSAPLS…
unitig_387	g14016	1994	unitig_387:17044-19038	OTHER	N	N	GT29	1	MGAESSTDLPMSAIDFETYQGLRYTQEVPNSREPSRGPIYVTKPLYVDESKLTLYTNFLTGVAIDNGTRNLYGTRKIVNGQAREYEWITYNQALAYVEAIASGLTKFARLKRGDMVGIFSKNRAEWCLSSHACDRMTYTLVPLYDTLGADAVPYIVNHTELTTIIYASELFNVVLECVDACPTLKYIVQYEDVTEAQRRMAAEKGLELKSLAELEALGKSHPLPADPPTPEDIATICYTSGTTGNPKGVVLKHRNMAIIGSMLQELGKFHSDTVHMSYLPLPHVFERAIMSLIVYLGAAAGFYQGDVLTLMDDMVALQPTLFISVPRLYNRVYDKITQGVAVAGGLKKMMFDQAYAAKKAARAEGYKTHALWDALVFSKVRQVLGGRIDTMISGSAPLS…
unitig_387	g14018	1988	unitig_387:20093-22081	OTHER	N	N	GT29	1	MGVNASTELPMSTIDFETYKGLRYTQEVPNSREPNRGPIYVTKPLYVHDKLTLHDNFLAGVAIENGTRNLYGTRKIVHGQPREYEWMTYNQALEHVEAIASGLTKFAGLKRGGMVGIFSKNRVEWCLSSHACDRMTYTLVPLYDTLDPEAVPFIVNHTEMETLFFAREQFKVLLACKDACPTLKYIVQFEDVTDEQRRLAAEKGLDLKSLNEIESLGTNHPLPADPPTPEDVATICYTSGTTGNPKGVVLTHLNMGVLGAMVRERIAFKKDTVHISYLPLPHVFERAVLVALVNLGACAGFYCGDVLTLMEDIAELKPTLFISVPRLYNRVYDKIMQGVAAAGGLKKLMFDQAYAAKKAAIADGHKTHAFWDALVFSKIRQVLGGRVELMLTGSAPLNV…
unitig_81	g14223	5999	unitig_81:105618-111617	OTHER	N	N	GT68	1	MLRPPIDPKAQSAFCLVELMSASNDSREVPSSSRATSVTHIRTLLWKNWLLKRRHFIATFLEVAIPCVFVLVLGILKKETDDVSVPAGWSDDNATAVDDTIGTAYNLFDPIGAFNRWVPTLLPRFYMHEGSMTGLLLSLGAQSIADGYRLGELPETDRTKCTQFVSVNGYISTNLSSPYQVPTACGGRVAPYKIGIVPDTDFTRQYFLKTMDQWYPRIKFGNLTGGVEIPSFRDSVEFFKSEEDLEDYVKGKEYGEDATHPRIYGAIVFDKYPADSDIGKFESIEYTIRMNSTLGRGQVIGVIPPTNGDPPAFSPFQKSIKVDYYSRYAVTGFMTLQTLVTRFVTCMPKWDGSKKTTDGKCQHAQATAIASDELDDRLLTSLNEDARIKLALSAFSSGS…
unitig_81	g14225	5948	unitig_81:114887-120835	OTHER	N	N	GT68	1	MDAPAQPQVVRNTPLQESPDASTPSTALSTQRTTWTHVKTLLAKNWLLKRRHPVATFLEVAIPCLFILLLSVLKHRTKDVTVPSGWSDTVGMPGNESFATTYNLFDAEGGYNLWIPTALPRFYQHESSMTGLLLALGARSIADGIRMNELSTSNLTACTQAVATQGFISTNISSPYKVPEVCASKVSPYKIGVAPDTPFTRDYFLKTMDEWYPRIKLWNSSDAPQIPSFRDAVEFFATAEALEDYVKGDTYGDSVTHPRIFGAIVFNQFPVDSAIGKFESIEYTLRLNSTMTFDGDLGFIPPTYGDPLQVSAFQKALKTDYYSSYALTGFMTLQTLVTRFVTCMPKWDTAKKTTTGDCQRSQSTATPSDGLDVRLLSTLNDDANIRMALSALGNENSSG…
unitig_81	g14235	6047	unitig_81:138744-144791	OTHER	N	N	GT68	1	MLTRDESIPIMNVNALGREESLPMMTAAPFNRVESTPFMTTPAAPKEEVPNKLSSRRTTWTHVKTLLAKNWLLKRRHGFATFLEVALPCLFILLLGVLKGLTTDVNVPAGWSTDDGTKVDDSIGTSYNFFTPTGSVIPWVPTPLPKFYMHEGSLSGLLLSLGNQSIIDGIRLDELSATDLAKCKQAVAIQGYISTNSSSPYKVPDICGGKVAPYKIGIAPDTAFTRDYFLNVMDQWYPRIKLSNSTKDGVEIPSLRDAVEFFKTAQDLEDYVKGKEYGDGASRPRIYGALVFDKVPSESNIGKFESIEYTIRMNSTTGRNNVEGVTPSTGGDPPELSPFRKALEVDHYSRYAVTGFMALQTLVTRFVTCMPKWDASKKTTNGECQRVQSTAVASDELDD…
unitig_81	g14236	6047	unitig_81:146170-152217	OTHER	N	N	GT68	1	MLTRDESIPIMNANALGREESLHMMTTAPFNRVESTPFMTTPAAPKDEVPNKLSSRRTTWTHVKTLLAKNWLLKRRHGFATFLEVALPCLFILLLGVLKRLVTDVDVPAGWSTDEGTPADDSIGTSYNFFTPNGTLIPWVPTSLPKFYMHEGSLSGLLLSLGTQSIFDGIRLDELSTTDLAQCIQAVAMQGHISTNSSSPYKVPDACGGKVAPYKIGIAPNTAFTRDYFLNVMDQWYPRIKFINSTRSGVEVPSFRDAVEFFDTAQDLEAYVQGQEYGDGASRPRIYGALVFDKVPSDSNIGKFESIEYTIRMNSTTGRNNLEGVTPRTNGDPAEVSQFRKSLEIDHYSRYAVTGFMTLQTLVTRFVTCMPKWDASKKTTTGECQRVQSTAVASDELDD…
unitig_81	g14237	5951	unitig_81:153492-159443	OTHER	N	N	GT68	1	MLASLSRSESTPIMTAPIAINDKGSTPLSSRRTTWIHVKTLLSKNGLLKRRHAVATLLEVAIPCIFILLLGVLKKQTANVNVPAGWSDDSDHGTSYNFFDPTGSTIAWVPTPLPRFYMHEGSMSGLLLSLGSQSVFDGVRLDELSASNLAQCTQSVAVQGYISTNQSSPYKVPDACAEKVAPYKIGVAPDTAFTRDYFLKTMDQWYPRIKISNMTDDGVEIPSFRDSVEFFTTARDLEDYVKGKEYGEGALHPRLYGAIVFDKIPSDRNIGKFESIEYTIRMNSTLGEDGVLGVIPRTNDGPPEVSALRKALKGDYYSRYAVTGFMTLQTLVTRFVTCMPKWDASKKTTTGECQRPQATAISSDDLDDRLLSSLNDDARIQFALSALLSGNGTSMVFNI…
unitig_81	g14295	5879	unitig_81:297617-303496	OTHER	N	N	GT68	1	MGSTTSGAGNAALPTSERLAAQRTTVTYVKTLMWKNWLLKKRHPVATALEVLIPAIFILLVGFLKKAMDDSSIPAGWSDDAKGGTSYNLFTPSGGYIDAIATSTPQFYMHEATMTGLILSLGSQAFKDGLKMQELSTTDLAACKKGLEVYGAVTANASSPHKIPDACGGKVVPYKLAIAPDNVFTREYFMQTMDVWYPRIKLANGTDVPQIPSLRESIEFYSTADALETYVSSTEYGSGPEYPRIYGAIVFDQFPSDSEVGKFTSIEYTIRMNSTVGSTGDIGLIPRTVGNPPELSPFQRDLKTDHYSRYAVSGFMSLQTLVTRFVTCMPTWESGKKSTPGKCQRELSTADSSDELDERLLSTFDDDSRMKSALSTFTNGTSNFSSVLESAPADSKEAL…
unitig_80	g14362	3405	unitig_80:31914-35319	OTHER	N	N	AA1	1	MIAQTNKPTLVQWEELSFVIMDAPNNSNLHLYLKELKKYNVTELVRACEVTYGREGVEAAGIRVHEMEFPDGEPPDAEILVRSSVRHDEKKCAGRSSKSAMMKSRHLASWNTEFKCELSKDHNAIVGRVLARMRCEISSKHQEDLANAVVGAIELLLIRIKKQVLKGNAIPAATRTNSQGCPVIHTPIFWPPLRMKPSVSFVFLFVVAAAIQLVCASNIRRYHWRVTQFPAAYDGVTRLVYGINNRPGHESPIEITLGDTIEVHVVNALQEPTCIHWHGMKQYGTPQYDGTSGITQCSIKPGRSMVYRFKPSEAGTFWWHGHDDTQYTEGLRGPLIVHDPKNHQSQSQSRPRVDEEYTVQMADWYHNGGLVWDTVLINDRGRFNCSELSEPVASLPCTD…
unitig_80	g14363	1670	unitig_80:41937-43607	SP(Sec/SPI)	N	N	AA1	1	MKPSVSFVFLFVVAAAIQLVCASNIRRYHWRVTQFPAAYDGVTRLVYGINNRPGHESPIEITLGDTIEVHVVNALQEPTCIHWHGMKQYGTPQYDGTSGITQCSIKPGRSMVYRFKPSEAGTFWWHGHDDTQYTEGLRGPLIVHDPKNHQSQSQSRPRVDEEYTVQMADWYHNGGLVWDTVLINDRGRFNCSELSEPVASLPCTDVQPLTRFKFQHGKRYLLRLINVAAHAAFEFSIDEHEFRVVAADGNPVQPSATINSLIINVAQRYEIIVDAHRPNKCGSDTDRFWMRATSLFNPPWTPPLNPPPSGFNPNGLAIVEYGNQQQYHLEPTSSPWDDAAKVTIPEFGFKPLQAPELVADPERHIVSFTMTTTEENPAFLAYISIDGSAQESFVMPPRP…
unitig_80	g14364	1670	unitig_80:44827-46497	SP(Sec/SPI)	N	N	AA1	1	MKPSVSFVFLFVVAAAIQLVCASNIRRYHWRVTQFPAAYDGVTRLVYGINNRPGHESPIEITLGDTIEVHVVNALQEPTCIHWHGMKQYGTPQYDGTSGITQCSIKPGRSMVYRFKPSEAGTFWWHGHDDTQYTEGLRGPLIVHDPKNHQSQSQSRPRVDEEYTVQMADWYHNGGLVWDTVLINDRGRFNCSELSEPVASLPCTDVQPLTRFKFQHGKRYLLRLINVAAHAAFEFSIDEHEFRVVAADGNPVQPSATINSLIINVAQRYEIIVDAHRPNKCGSDTDRFWMRATSLFNPPWTPPLNPPPSGFNPNGLAIVEYGNQQQYHLEPTSSPWDDAAKVTIPEFGFKPLQAPELVADPERHIVSFTMTTTEENPAFLAYISIDGSAQESFVMPPRP…
unitig_80	g14365	1670	unitig_80:47717-49387	SP(Sec/SPI)	N	N	AA1	1	MKPSVSFVFLFVVAAAIQLVCASNIRRYHWRVTQFPAAYDGVTRLVYGINNRPGHESPIEITLGDTIEVHVVNALQEPTCIHWHGMKQYGTPQYDGTSGITQCSIKPGRSMVYRFKPSEAGTFWWHGHDDTQYTEGLRGPLIVHDPKNHQSQSQSRPRVDEEYTVQMADWYHNGGLVWDTVLINDRGRFNCSELSEPVASLPCTDVQPLTRFKFQHGKRYLLRLINVAAHAAFEFSIDEHEFRVVAADGNPVQPSATINSLIINVAQRYEIIVDAHRPNKCGSDTDRFWMRATSLFNPPWTPPLNPPPSGFNPNGLAIVEYGNQQQYHLEPTSSPWDDAAKVTIPEFGFKPLQAPELVADPERHIVSFTMTTTEENPAFLAYISIDGSAQESFVMPPRP…
unitig_85	g14605	4220	unitig_85:292219-296439	OTHER	N	N	GH38	1	MSPSPPNSALAMDTTPARINKFDGTNFHTWKFKMQMVLEERDVWEVVSGEVKLEQCQTPADQAIFHKKSRKALAMICLAMEDSQLPLVRSASGAHDAWSRLEGHFEKKSLANKLFLRRRFFTTMMEEGDDVLGHINKLKTLAEQLDAVGASVSEEDLVITLLGSLSESYQFLITALESRSDTLTWELVTSRLLHEDMKRKEQGGDGTTPGSAFMTSDWKRKGRPVKKSGACNHCGKMGHWIAECPSRIQDNGNSRQRFQRANVVRDEDPGEYLFSVGEVQDLNKSNSAWLIDSGATQHMAHSKVFMKNYKKIDPVDVHLADDGVVQAIGIGDIVMSMKTSSGMKKGVLTSVWHIPKLSRNLFSVGRFTKDVAPVTFDSTSCFVNLKGAKWTIGSRIGKG…
unitig_85	g14606	4220	unitig_85:299541-303761	OTHER	N	N	GH38	1	MSPSPPDSALAMDTTPARINKFDGTNFHTWKFKMQMVLEERDVWEVVSGEVKLEQCQTPADQAIFHKKSRKALAMICLAMEDSQLPLVRSASGAHDAWSRLEGHFEKKSLANKLFLRRRFFTTMMEEGDDVLGHINKLKTLAEQLDAVGASVSEEDLVITLLGSLSESYQFLITALESRSDTLTWELVTSRLLHEDMKRKEQGGDGTTPGSAFMTSDWKRKGRPVKKSGACNHCGKMGHWIAECPSRIQDNGNSRQRFQRANVVRDEDPGEYLFSVGEVQDLNKSNSAWLIDSGATQHMAHSKVFMKNYKKIDPVDVHLADDGVVQAIGIGDIVMSMKTSSGMKKGVLTSVWHIPKLSRNLFSVGRFTKDVAPVTFDSTSCFVNLKGAKWTIGSRIGKG…
unitig_103	g14788	1332	unitig_103:47031-48363	OTHER	N	N	GT22	1	MSSYYKPTVVIDNGTGYTKLGYAGNAEPSYIIPSTIAVGGADSSVVRSRQGIDDLDFYIGNEALDHASTHQVNYPISQGIIQNWDNMEKLWQRCMFQYLRCEPEEHYVLLTEPPLNPPENREATAEIMFETFNVPGLYIAVQAVLALYASWPKIKDPSQRSLTGTVIDSGDGVTHVIPVADGYVIGSCIRHIPLAGRDVTHFIQKMLRDRGEPVPPEDSLEVAKRVKEMHSYVCSDIAKEFKKYDQKPDKYVMQYGDVHGRTKQPWQIDVGYERFLAPEIFFNPEIFSTDFTTPLPNVVDEAILKCPIDTRRGLYKNIVLSGGSTMFKDFGRRLQRDIKRLVDDRQRENLALHSKFAQASADELDVNVISHRMQRFAVWFGGSMVASTPDFYRVCHTKA…
unitig_76	g14926	1993	unitig_76:915-2908	OTHER	N	N	GT29	1	MGAESSTDLPMSAIDFETYQGLRYTQEVPNSREPSRGPIYVTKPLYVDESKLTLYTNFLTGVAIDNGTRNLYGTRKIVNGQAREYEWITYNQALAYVEAIASGLTKFARLKRGDMVGIFSKNRAEWCLSSHACDRMTYTLVPLYDTLGADAVPYIVNHTELTTIIYASELFNVVLECVDACPTLKYIVQYEDVTEAQRRMAAEKGLELKSLAELEALGKSHPLPADPPTPEDIATICYTSGTTGKPKGVVLKHRNMAIIGSMLQELGKFHSDTVHMSYLPLPHVFERAIMSLIVYLGAAAGFYQGDVLTLMDDMVALQPTLFISVPRLYNRVYDKITQGVAVAGGLKKMMFDQAYAAKKAARAEGYKTHALWDALVFSKVRQVLGGRIDTMISGSAPLS…
unitig_76	g14928	1854	unitig_76:4406-6260	OTHER	N	N	GT29	1	MKASSRFTTNFLTGVAIDNGTRNLYGTRKIVNGQAREYEWITYNQALAYVEAIASGLTKFARLKRGDMVGIFSKNRAEWCLSSHACDRMTYTLVPLYDTLGADAVPYIVNHTELTTIIYASELFNVVLECVDACPTLKYIVQYEDVTEAQRRMAAEKGLELKSLAELEALGKSHPLPADPPTPEDIATICYTSGTTGNPKGVVLKHRNMAIIGSMLQELGKFHSDTVHMSYLPLPHVFERAIMSLIVYLGAAAGFYQGDVLTLMDDMVALQPTLFISVPRLYNRVYDKITQGVAVAGGLKKMMFDQAYAAKKAARAEGYKTHALLGRFWCSRSAEVKEFMAVAFGCDFLEGYGLSETGAVVSAPLRHTPLGAHVGMPLPNLLVRLEDVPEMGYTSNDKP…
unitig_76	g14930	1993	unitig_76:7614-9607	OTHER	N	N	GT29	1	MGAESSTDLPMSAIDFETYQGLRYTQEVPNSREPSRGPIYVTKPLYVDESKLTLYTNFLTGVAIDNGTRNLYGTRKIVNGQAREYEWITYNQALAYVEAIASGLTKFARLKRGDMVGIFSKNRAEWCLSSHACDRMTYTLVPLYDTLGADAVPYIVNHTELTTIIYASELFNVVLECVDACPTLKYIVQYEDVTEAQRRMAAEKGLELKSLAELEALGKSHPLPADPPTPEDIATICYTSGTTGNPKGVVLKHRNMAIIGSMLQELGKFHSDTVHMSYLPLPHVFERAIMSLIVYLGAAAGFYQGDVLTLMDDMVALQPTLFISVPRLYNRVYDKITQGVAVAGGLKKMMFDQAYAAKKAARAEGYKLMRFGTLWCSRSAEVKEFMAVAFGCDFLEGYG…
unitig_76	g14932	1994	unitig_76:10961-12955	OTHER	N	N	GT29	1	MGAESSTDLPMSAIDFETYQGLRYTQEVPNSREPSRGPIYVTKPLYVDESKLTLYTNFLTGVAIDNGTRNLYGTRKIVNGQAREYEWITYNQALAYVEAIASGLTKFARLKRGDMVGIFSKNRAEWCLSSHACDRMTYTLVPLYDTLGADAVPYIVNHTELTTIIYASELFNVVLECVDACPTLKYIVQYEDVTEAQRRMAAEKGLELKSLAELEALGKSHPLPADPPTPEDIATICYTSGTTGNPKGVVLKHRNMAIIGSMLQELGKFHSDTVHMSYLPLPHVFERAIMSLIVYLGAAAGFYQGDVLTLMDDMVALQPTLFISVPRLYNRVYDKITQGVAVAGGLKKMMFDQAYAAKKAARAEGYKTHALWDALVFSKVRQVLGGRIDTMISGSAPLS…
unitig_76	g14934	4845	unitig_76:14803-19648	OTHER	N	N	GT29	1	MQPTLFISVPRLYNRVYDKITQGVAVAGGLKKMMFDQAYAAKKAARAEATKLMRFGTLCVLEGPSSARWSHRYDDLRLGPSQCRVKEFMAVAFGCDFLEGYGLSETGAVVSAPLRHTPLGAHVGMPLPNLLVRLEDVPEMGYTSNDKPRPRGEIICKGPNVFSGYYKEPEKTAEAIDQDGWFHTGDIGCWTLMIVNGQAREYEWITYNQALAYVEAIASGLTKFARLKRGDMVGIFSKNRAEWCLSSHACDRMTYTLVPLYDTLGADAVPYIVNHTELTTIIYASELFNVVLECVDACPTLKYIVQYEDVTEAQRRMAAEKGLELKSLAELEALGKSHPLPADPPTPEDIATICYTSGTTGNPKGVVLKHRNMAIIGSMLQELGKFHSDTVHMSYLPLP…
unitig_36	g14971	4220	unitig_36:15148-19368	OTHER	N	N	GH38	1	MSPSPPDSAFAMDTTPARINKFDGTNFHTWKFKMQMVLEERDVWEVVSGEVKLEQCQTPADQAIFHKKSRKALAMICLAMEDSQLPLVRSASGAHDAWSRLEGHFEKKSLANKLFLRRRFFTTMMEEGDDVLGHINKLKTLAEQLDAVGASVSEEDLVITLLGSLSESYQFLITALESRSDTLTWELVTSRLLHEDMKRKEQGGDGTTPGSAFMTSDWKRKGRPVKKSGACNHCGKMGHWIAECPSRIQDNGNSRQRFQRANVVRDEDPGEYLFSVGEVQDLNKSNSAWLIDSGATQHMAHSKGFMKNYKKIDPVDVHLADDGVVQAIGIGDIVMSMKTSSGMKKGVLTSVWHIPKLSRNLFSVGRFTKDVAPVTFDSTSCFVNLKGAKWTIGSRIGKG…
unitig_494	g14976	1397	unitig_494:253-1650	OTHER	N	N	GT29	1	MAAEKGLELKSLAELEALGKSHPLPADPPTPEDIATICYTSGTTGNPKGVVLKHRNMAIIGSMLQELGKFHSDTVHMSYLPLPHVFERAIMSLIVYLGAAAGFYQGDVLTLMDDMVALQPTLFISVPRLYNRVYDKITQGVAVAGGLKKMMFDQAYAAKKAARAEGYKTHALWDALVFSKVRQVLGGRIDTMISGSAPLSAEVKEFMAVAFGCDFLEGYGLSETGAVVSAPLRHTPLGAHVGMPLPNLLVRLEDVPEMGYTSNDKPRPRGEIICKGPNVFSGYYKEPEKTAEAIDQDGWFHTGDIGCWNADGTLSIIDRKKNIFKLSQGEYIAAEKIENIYAKSKYVAQIFVYGDSYQSMLVAVAVPDPEVAEAWGTSKGLSREDSTAAKLVNDSEFQR…
unitig_494	g14980	1992	unitig_494:6921-8913	OTHER	N	N	GT29	1	MGAESSTDLPMSAIDFETYQGLRYTQEVPNSREPSRGPIYVTKPLYVDESKLTLYTNFLTGVAIDNGTRNLYGTRKIVNGQAREYEWITYNQALAYVEAIASGLTKFARLKRGDMVGIFSKNRAEWCLSSHACDRMTYTLVPLYDTLGADAVPYIVNHTELTTIIYASELFNVVLECVDACPTLKYIVQYEDVTEAQRRMAAEKGLELKSLAELEALGKSHPLPADPPTPEDIATICYTSGTTGNPKGVVLKHRNMAIIGSMLQELGKFHSDTVHMSYLPLPHVFERAIMSLIVYLGAAAGFYQGDVLTLMDDMVALQPTLFISVPRLYNRVYDKITQGVAVAGGLKKMMFDQAYAAKKAARAEGYKTHALWDALVFSKVRQVLGGRIDTMISGSAPLS…
unitig_494	g14982	1994	unitig_494:10268-12262	OTHER	N	N	GT29	1	MGAESSTDLPMSAIDFETYQGLRYTQEVPNSREPSRGPIYVTKPLYVDESKLTLYTNFLTGVAIDNGTRNLYGTRKIVNGQAREYEWITYNQALAYVEAIASGLTKFARLKRGDMVGIFSKNRAEWCLSSHACDRMTYTLVPLYDTLGADAVPYIVNHTELTTIIYASELFNVVLECVDACPTLKYIVQYEDVTEAQRRMAAEKGLELKSLAELEALGKSHPLPADPPTPEDIATICYTSGTTGNPKGVVLKHRNMAIIGSMLQELGKFHSDTVHMSYLPLPHVFERAIMSLIVYLGAAAGFYQGDVLTLMDDMVALQPTLFISVPRLYNRVYDKITQGVAVAGGLKKMMFDQAYAAKKAARAEGYKTHALWDALVFSKVRQVLGGRIDTMISGSAPLS…
unitig_494	g14984	1589	unitig_494:13615-15204	OTHER	N	N	GT29	1	MTYTLVPLYDTLGADAVPYIVNHTELTTIIYASELFNVVLECVDACPTLKYIVQYEDVTEAQRRMAAEKGLELKSLAELEALGKSHPLPADPPTPEDIATICYTSGTTGNPKGVVLKHRNMAIIGSMLQELGKFHSDTVHMSYLPLPHVFERAIMSLIVYLGAAAGFYQGDVLTLMDDMVALQPTLFISVPRLYNRVYDKITQGVAVAGGLKKMMFDQAYAAKKAARAEGYKTHALWDALVFSKVRQVLGGRIDTMISGSAPLSAEVKEFMAVAFGCDFLEGYGLSETGAVVSAPLRHTPLGAHVGMPLPNLLVRLEDVPEMGYTSNDKPRPRGEIICKGPNVFSGYYKEPEKTAEAIDQDGWFHTGDIGCWNADGTLSIIDRKKNIFKLSQGEYIAAE…
